# Supplementary material
Source: publisher figshare collection journal article supplement (https://acs.figshare.com/ndownloader/files/7293101)
Supplement: Supplementary file 1 [file 7293101]

## Sheet: Supplementary Table ST1
Protein	Label	log2FC	SE	Tvalue	DF	pvalue	adj.pvalue	issue	MissingPercentage	ImputationPercentage
sp|A5Z2X5|YP010_YEAST	C2-C1	0.804922	3.57616	0.22508	8	0.82756	0.999512	NA	0	0
sp|D6VTK4|STE2_YEAST	C2-C1	0.0875198	0.174462	0.501656	8	0.629422	0.999512	NA	0	0
sp|O13297|CET1_YEAST	C2-C1	-0.0673664	0.070319	-0.958012	8	0.36611	0.999512	NA	0	0
sp|O13329|FOB1_YEAST	C2-C1	0.726816	0.538558	1.34956	8	0.214102	0.999512	NA	0	0
sp|O13516|RS9A_YEAST	C2-C1	-0.267996	0.278577	-0.962015	8	0.364214	0.999512	NA	0	0
sp|O13520|YP044_YEAST	C2-C1	-4.9559	0.881246	-5.62374	8	0.000496334	0.169881	NA	0	0
sp|O13525|COQ4_YEAST	C2-C1	3.5543	0.964982	3.68328	8	0.0061898	0.999512	NA	0	0
sp|O13539|THP2_YEAST	C2-C1	0.295773	0.802721	0.368463	8	0.722087	0.999512	NA	0	0
sp|O13547|CCW14_YEAST	C2-C1	-0.0895911	0.158398	-0.565608	8	0.587169	0.999512	NA	0	0
sp|O13563|RPN13_YEAST	C2-C1	-0.0786558	0.0700902	-1.12221	8	0.294323	0.999512	NA	0	0
sp|O13577|DIF1_YEAST	C2-C1	0.794485	0.589581	1.34754	6	0.226461	0.999512	NA	0	0
sp|O13585|YP089_YEAST	C2-C1	-0.138166	0.156276	-0.884112	8	0.402424	0.999512	NA	0	0
sp|O14455|RL36B_YEAST	C2-C1	-0.226091	0.271694	-0.83215	8	0.429463	0.999512	NA	0	0
sp|O14467|MBF1_YEAST	C2-C1	0.156777	0.177281	0.88434	8	0.402308	0.999512	NA	0	0
sp|O14468|YO304_YEAST	C2-C1	-0.300319	0.521122	-0.576294	8	0.580264	0.999512	NA	0	0
sp|O43137|YB085_YEAST	C2-C1	-0.169534	0.0630527	-2.68877	8	0.0275493	0.999512	NA	0	0
sp|O60200|MDM35_YEAST	C2-C1	1.29568	1.20793	1.07265	8	0.314715	0.999512	NA	0	0
sp|O74700|TIM9_YEAST	C2-C1	0.0038606	0.136238	0.0283371	8	0.978087	0.999512	NA	0	0
sp|P00127|QCR6_YEAST	C2-C1	-0.016673	0.202932	-0.0821605	8	0.936538	0.999512	NA	0	0
sp|P00128|QCR7_YEAST	C2-C1	0.0389318	0.0662507	0.587643	8	0.572981	0.999512	NA	0	0
sp|P00330|ADH1_YEAST	C2-C1	0.0535051	0.0717341	0.74588	8	0.477082	0.999512	NA	0	0
sp|P00358|G3P2_YEAST	C2-C1	0.271212	0.326066	0.831771	8	0.429665	0.999512	NA	0	0
sp|P00359|G3P3_YEAST	C2-C1	0.200646	0.254631	0.787989	8	0.453416	0.999512	NA	0.0333333	0.0333333
sp|P00360|G3P1_YEAST	C2-C1	-0.0163484	0.0594996	-0.274764	8	0.79046	0.999512	NA	0	0
sp|P00410|COX2_YEAST	C2-C1	0.0481592	0.355593	0.135433	8	0.895615	0.999512	NA	0	0
sp|P00424|COX5A_YEAST	C2-C1	0.150571	0.332976	0.452199	8	0.663135	0.999512	NA	0	0
sp|P00425|COX5B_YEAST	C2-C1	-0.220374	0.19082	-1.15488	8	0.281469	0.999512	NA	0	0
sp|P00427|COX6_YEAST	C2-C1	0.0378576	0.118314	0.319975	8	0.757184	0.999512	NA	0	0
sp|P00431|CCPR_YEAST	C2-C1	-0.00848413	0.0612718	-0.138467	8	0.893293	0.999512	NA	0	0
sp|P00445|SODC_YEAST	C2-C1	0.0398211	0.110188	0.361393	8	0.727164	0.999512	NA	0	0
sp|P00447|SODM_YEAST	C2-C1	-0.0408992	0.112623	-0.363153	8	0.725899	0.999512	NA	0	0
sp|P00498|HIS1_YEAST	C2-C1	-0.0206872	0.11466	-0.180421	8	0.861309	0.999512	NA	0	0
sp|P00546|CDK1_YEAST	C2-C1	-0.177396	0.0701602	-2.52844	8	0.0353413	0.999512	NA	0	0
sp|P00549|KPYK1_YEAST	C2-C1	0.0294378	0.0538552	0.546611	8	0.599556	0.999512	NA	0	0
sp|P00560|PGK_YEAST	C2-C1	0.0393128	0.0556437	0.70651	8	0.499927	0.999512	NA	0	0
sp|P00572|KTHY_YEAST	C2-C1	-0.212911	0.164182	-1.2968	8	0.23085	0.999512	NA	0	0
sp|P00635|PPA5_YEAST	C2-C1	-0.127839	0.119112	-1.07327	8	0.314456	0.999512	NA	0	0
sp|P00724|INV2_YEAST	C2-C1	0.130135	0.0520494	2.50022	8	0.0369297	0.999512	NA	0.0208333	0.0208333
sp|P00729|CBPY_YEAST	C2-C1	-0.0703545	0.108598	-0.647841	8	0.535234	0.999512	NA	0	0
sp|P00761|TRYP_PIG	C2-C1	0.0552706	0.0875994	0.630947	8	0.545674	0.999512	NA	0	0
sp|P00812|ARGI_YEAST	C2-C1	-0.183887	0.10776	-1.70644	8	0.126315	0.999512	NA	0	0
sp|P00815|HIS2_YEAST	C2-C1	0.0220879	0.0527303	0.418885	8	0.68632	0.999512	NA	0.00438597	0.00438597
sp|P00817|IPYR_YEAST	C2-C1	-0.0490802	0.0531512	-0.923406	8	0.382802	0.999512	NA	0	0
sp|P00830|ATPB_YEAST	C2-C1	0.00212312	0.0458233	0.0463327	8	0.964181	0.999512	NA	0.0178571	0.0178571
sp|P00890|CISY1_YEAST	C2-C1	-0.0227993	0.0232808	-0.979317	8	0.356106	0.999512	NA	0	0
sp|P00899|TRPE_YEAST	C2-C1	0.00433853	0.0682352	0.063582	8	0.950863	0.999512	NA	0	0
sp|P00924|ENO1_YEAST	C2-C1	0.102062	0.050014	2.04067	8	0.0755955	0.999512	NA	0	0
sp|P00925|ENO2_YEAST	C2-C1	0.0332324	0.0536824	0.619056	8	0.553095	0.999512	NA	0	0
sp|P00927|THDH_YEAST	C2-C1	0.00646466	0.0555985	0.116274	8	0.910301	0.999512	NA	0	0
sp|P00931|TRP_YEAST	C2-C1	-0.0280277	0.0499474	-0.561144	8	0.590067	0.999512	NA	0	0
sp|P00937|TRPG_YEAST	C2-C1	0.0488047	0.0994775	0.49061	8	0.636875	0.999512	NA	0	0
sp|P00942|TPIS_YEAST	C2-C1	0.000421762	0.08517	0.004952	8	0.99617	0.999512	NA	0.0238095	0.0238095
sp|P00950|PMG1_YEAST	C2-C1	0.010212	0.0790983	0.129106	8	0.900461	0.999512	NA	0	0
sp|P00958|SYMC_YEAST	C2-C1	-0.0547479	0.028525	-1.9193	8	0.0912142	0.999512	NA	0	0
sp|P01094|IPA3_YEAST	C2-C1	-0.158544	0.944305	-0.167895	8	0.870833	0.999512	NA	0	0
sp|P01097|ATIF_YEAST	C2-C1	-0.258918	0.212213	-1.22009	8	0.257175	0.999512	NA	0	0
sp|P01098|STF1_YEAST	C2-C1	1.42541	1.16896	1.21939	8	0.257427	0.999512	NA	0	0
sp|P01119|RAS1_YEAST	C2-C1	-0.0845437	0.166467	-0.507871	8	0.625247	0.999512	NA	0	0
sp|P01120|RAS2_YEAST	C2-C1	-0.101735	0.111787	-0.910086	8	0.389374	0.999512	NA	0	0
sp|P01123|YPT1_YEAST	C2-C1	-0.359816	0.271559	-1.325	8	0.221764	0.999512	NA	0	0
sp|P02309|H4_YEAST	C2-C1	-0.0431044	0.0893784	-0.482269	8	0.642534	0.999512	NA	0	0
sp|P02381|RMAR_YEAST	C2-C1	-0.171786	0.170835	-1.00557	8	0.344066	0.999512	NA	0	0
sp|P02400|RLA4_YEAST	C2-C1	-0.0259188	0.162822	-0.159185	8	0.877469	0.999512	NA	0	0
sp|P02406|RL28_YEAST	C2-C1	-0.188006	0.0885942	-2.1221	8	0.0666069	0.999512	NA	0	0
sp|P02557|TBB_YEAST	C2-C1	0.0963653	0.0776474	1.24106	8	0.249739	0.999512	NA	0	0
sp|P02829|HSP82_YEAST	C2-C1	-0.0689455	0.171435	-0.402168	8	0.698092	0.999512	NA	0	0
sp|P02992|EFTU_YEAST	C2-C1	-0.0415362	0.0695955	-0.596824	8	0.567127	0.999512	NA	0.0166667	0.0166667
sp|P02994|EF1A_YEAST	C2-C1	0.0618741	0.0638695	0.968759	8	0.361038	0.999512	NA	0	0
sp|P03871|REP1_YEAST	C2-C1	-0.083349	0.137964	-0.604137	8	0.562489	0.999512	NA	0	0
sp|P03872|REP2_YEAST	C2-C1	-0.0275104	0.0777735	-0.353725	8	0.732686	0.999512	NA	0	0
sp|P03874|CBP2_YEAST	C2-C1	0.0544237	0.121975	0.446187	8	0.667292	0.999512	NA	0	0
sp|P03876|AI2M_YEAST	C2-C1	1.89541	1.30236	1.45536	8	0.183657	0.999512	NA	0	0
sp|P03965|CARB_YEAST	C2-C1	0.0310593	0.0538039	0.577269	8	0.579636	0.999512	NA	0.00520833	0.00520833
sp|P04037|COX4_YEAST	C2-C1	0.000441757	0.190235	0.00232217	8	0.998204	0.999533	NA	0	0
sp|P04039|COX8_YEAST	C2-C1	-0.0661116	0.108771	-0.607802	8	0.560173	0.999512	NA	0	0
sp|P04046|PUR1_YEAST	C2-C1	0.0720059	0.0559413	1.28717	8	0.234025	0.999512	NA	0	0
sp|P04050|RPB1_YEAST	C2-C1	0.0128461	0.0513301	0.250264	8	0.808691	0.999512	NA	0.00340136	0.00340136
sp|P04051|RPC1_YEAST	C2-C1	-0.0942929	0.0405267	-2.32668	8	0.0484117	0.999512	NA	0	0
sp|P04076|ARLY_YEAST	C2-C1	-0.0497749	0.06037	-0.824498	8	0.43355	0.999512	NA	0	0
sp|P04147|PABP_YEAST	C2-C1	-0.0714254	0.0526476	-1.35667	8	0.211927	0.999512	NA	0	0
sp|P04161|PUR3_YEAST	C2-C1	0.045774	0.144034	0.317801	8	0.758773	0.999512	NA	0	0
sp|P04449|RL24A_YEAST	C2-C1	-0.105171	0.161271	-0.652139	8	0.532597	0.999512	NA	0	0
sp|P04456|RL25_YEAST	C2-C1	-0.0562115	0.055209	-1.01816	8	0.338403	0.999512	NA	0	0
sp|P04650|RL39_YEAST	C2-C1	0.121106	0.144934	0.835593	8	0.427633	0.999512	NA	0	0
sp|P04710|ADT1_YEAST	C2-C1	-0.465471	0.450917	-1.03228	8	0.332137	0.999512	NA	0	0
sp|P04786|TOP1_YEAST	C2-C1	-0.125579	0.0694609	-1.80791	8	0.108236	0.999512	NA	0	0
sp|P04801|SYTC_YEAST	C2-C1	-0.00895629	0.0547962	-0.163447	8	0.87422	0.999512	NA	0.00396825	0.00396825
sp|P04802|SYDC_YEAST	C2-C1	-0.0415798	0.0497247	-0.8362	8	0.427311	0.999512	NA	0.00490196	0.00490196
sp|P04803|SYWM_YEAST	C2-C1	-0.042732	0.312895	-0.13657	8	0.894745	0.999512	NA	0.111111	0.111111
sp|P04806|HXKA_YEAST	C2-C1	-0.0267904	0.11677	-0.229429	8	0.824293	0.999512	NA	0	0
sp|P04807|HXKB_YEAST	C2-C1	0.0817224	0.0628992	1.29926	8	0.230046	0.999512	NA	0	0
sp|P04817|CAN1_YEAST	C2-C1	0.189152	0.210286	0.899495	7	0.398275	0.999512	NA	0	0
sp|P04819|DNLI1_YEAST	C2-C1	0.0914639	0.09912	0.922759	8	0.383119	0.999512	NA	0	0
sp|P04821|CDC25_YEAST	C2-C1	0.0445245	0.104181	0.427378	8	0.680375	0.999512	NA	0	0
sp|P04840|VDAC1_YEAST	C2-C1	0.0146289	0.0661081	0.221287	8	0.830412	0.999512	NA	0	0
sp|P05030|PMA1_YEAST	C2-C1	0.00508002	0.153483	0.0330983	8	0.974407	0.999512	NA	0	0
sp|P05066|PHR_YEAST	C2-C1	4.28724	0.692745	6.18876	8	0.000262627	0.123599	NA	0	0
sp|P05085|ARGR2_YEAST	C2-C1	-1.01247	1.5352	-0.659502	8	0.528098	0.999512	NA	0	0
sp|P05317|RLA0_YEAST	C2-C1	-0.00476763	0.0635885	-0.0749763	8	0.942075	0.999512	NA	0.0119048	0.0119048
sp|P05318|RLA1_YEAST	C2-C1	-0.269558	0.248451	-1.08495	8	0.309552	0.999512	NA	0	0
sp|P05319|RLA2_YEAST	C2-C1	0.0609969	0.123499	0.493908	8	0.634645	0.999512	NA	0	0
sp|P05373|HEM2_YEAST	C2-C1	-0.0126822	0.0587438	-0.215889	8	0.834477	0.999512	NA	0	0
sp|P05374|CHO2_YEAST	C2-C1	0.0805151	0.0582229	1.38288	8	0.204073	0.999512	NA	0.0128205	0.0128205
sp|P05375|PEM2_YEAST	C2-C1	0.00869066	0.270155	0.0321692	8	0.975125	0.999512	NA	0	0
sp|P05453|ERF3_YEAST	C2-C1	-0.102535	0.0587986	-1.74384	8	0.119346	0.999512	NA	0	0
sp|P05626|ATPF_YEAST	C2-C1	-0.0255202	0.0790823	-0.322705	8	0.755191	0.999512	NA	0	0
sp|P05694|METE_YEAST	C2-C1	0.00555012	0.0556122	0.0998004	8	0.922958	0.999512	NA	0.00396825	0.00396825
sp|P05737|RL7A_YEAST	C2-C1	0.0502586	0.262945	0.191137	8	0.85318	0.999512	NA	0	0
sp|P05738|RL9A_YEAST	C2-C1	-0.0250335	0.168215	-0.148818	8	0.88538	0.999512	NA	0	0
sp|P05739|RL6B_YEAST	C2-C1	0.0381994	0.0901629	0.423671	8	0.682967	0.999512	NA	0	0
sp|P05740|RL17A_YEAST	C2-C1	-0.0776226	0.221116	-0.351049	8	0.734617	0.999512	NA	0	0
sp|P05743|RL26A_YEAST	C2-C1	0.0359616	0.163135	0.220442	8	0.831049	0.999512	NA	0	0
sp|P05744|RL33A_YEAST	C2-C1	-0.00546848	0.293113	-0.0186566	8	0.985572	0.999512	NA	0	0
sp|P05745|RL36A_YEAST	C2-C1	-0.291835	0.315477	-0.925058	8	0.381992	0.999512	NA	0	0
sp|P05748|RL15A_YEAST	C2-C1	0.173523	0.22746	0.762871	8	0.467436	0.999512	NA	0	0
sp|P05749|RL22A_YEAST	C2-C1	0.236676	0.275822	0.858072	8	0.415819	0.999512	NA	0	0
sp|P05750|RS3_YEAST	C2-C1	-0.145775	0.0734078	-1.98583	8	0.0823026	0.999512	NA	0	0
sp|P05755|RS9B_YEAST	C2-C1	-0.272783	0.239705	-1.13799	8	0.288054	0.999512	NA	0	0
sp|P05756|RS13_YEAST	C2-C1	0.00935507	0.101498	0.0921702	8	0.928829	0.999512	NA	0	0
sp|P05759|RS27A_YEAST	C2-C1	-0.0313516	0.149547	-0.209643	8	0.839187	0.999512	NA	0	0
sp|P05986|KAPC_YEAST	C2-C1	-0.0259628	0.0393599	-0.659626	8	0.528023	0.999512	NA	0	0
sp|P06100|NOT2_YEAST	C2-C1	-0.199374	0.113368	-1.75864	8	0.116687	0.999512	NA	0	0
sp|P06101|CDC37_YEAST	C2-C1	0.0222413	0.0529317	0.420188	8	0.685406	0.999512	NA	0	0
sp|P06102|NOT3_YEAST	C2-C1	-0.107471	0.0907438	-1.18434	8	0.270271	0.999512	NA	0.00980392	0.00980392
sp|P06103|EIF3B_YEAST	C2-C1	0.028178	0.0735344	0.383194	8	0.711557	0.999512	NA	0	0
sp|P06105|SC160_YEAST	C2-C1	0.021855	0.0398533	0.548387	8	0.598392	0.999512	NA	0.00248756	0.00248756
sp|P06168|ILV5_YEAST	C2-C1	-0.0184493	0.0551448	-0.33456	8	0.746559	0.999512	NA	0.00694444	0.00694444
sp|P06169|PDC1_YEAST	C2-C1	-0.0289154	0.0466788	-0.619454	8	0.552846	0.999512	NA	0	0
sp|P06174|HEM4_YEAST	C2-C1	-0.095215	0.104167	-0.914057	8	0.387406	0.999512	NA	0	0
sp|P06197|PIS_YEAST	C2-C1	-0.0818293	0.0703501	-1.16317	8	0.278278	0.999512	NA	0	0
sp|P06208|LEU1_YEAST	C2-C1	0.0378113	0.0680377	0.555741	8	0.593585	0.999512	NA	0	0
sp|P06242|KIN28_YEAST	C2-C1	-0.76013	0.792992	-0.95856	8	0.36585	0.999512	NA	0	0
sp|P06244|KAPA_YEAST	C2-C1	0.1032	0.0888408	1.16163	8	0.278868	0.999512	NA	0	0
sp|P06245|KAPB_YEAST	C2-C1	-0.0228249	0.120834	-0.188895	8	0.85488	0.999512	NA	0	0
sp|P06633|HIS7_YEAST	C2-C1	0.0445539	0.0943664	0.472137	8	0.64944	0.999512	NA	0	0
sp|P06634|DED1_YEAST	C2-C1	-0.00863311	0.0687074	-0.12565	8	0.903109	0.999512	NA	0	0
sp|P06701|SIR3_YEAST	C2-C1	0.06485	0.391898	0.165477	8	0.872674	0.999512	NA	0	0
sp|P06704|CDC31_YEAST	C2-C1	-0.188666	0.129659	-1.45509	8	0.183732	0.999512	NA	0	0
sp|P06738|PHSG_YEAST	C2-C1	0.0541881	0.0417453	1.29807	8	0.230436	0.999512	NA	0	0
sp|P06773|DCTD_YEAST	C2-C1	-0.266887	0.177714	-1.50178	8	0.171553	0.999512	NA	0	0
sp|P06775|HIP1_YEAST	C2-C1	-0.017976	0.29905	-0.0601103	8	0.953542	0.999512	NA	0	0
sp|P06776|PDE2_YEAST	C2-C1	1.21523	0.806424	1.50694	8	0.170251	0.999512	NA	0	0
sp|P06778|RAD52_YEAST	C2-C1	0.133559	1.82233	0.07329	8	0.943375	0.999512	NA	0	0
sp|P06779|RAD7_YEAST	C2-C1	0.0195457	0.968954	0.0201719	8	0.9844	0.999512	NA	0	0
sp|P06780|RHO1_YEAST	C2-C1	-0.0274387	0.0537863	-0.510143	8	0.623725	0.999512	NA	0	0
sp|P06781|RHO2_YEAST	C2-C1	0.225267	0.182151	1.2367	8	0.25127	0.999512	NA	0	0
sp|P06782|SNF1_YEAST	C2-C1	0.0813731	0.044016	1.84872	8	0.101677	0.999512	NA	0	0
sp|P06784|STE7_YEAST	C2-C1	-1.76876	0.578087	-3.05968	8	0.0155901	0.999512	NA	0	0
sp|P06785|TYSY_YEAST	C2-C1	-0.0693831	0.137631	-0.504125	8	0.627762	0.999512	NA	0	0
sp|P06786|TOP2_YEAST	C2-C1	0.0192648	0.0544079	0.354082	8	0.732429	0.999512	NA	0	0
sp|P06787|CALM_YEAST	C2-C1	-0.0332587	0.0599726	-0.554566	8	0.594352	0.999512	NA	0.047619	0.047619
sp|P06839|RAD3_YEAST	C2-C1	1.5036	0.611226	2.45998	8	0.03932	0.999512	NA	0.0416667	0.0416667
sp|P06843|SPT2_YEAST	C2-C1	0.282497	0.603348	0.468216	8	0.652122	0.999512	NA	0	0
sp|P06844|SPT3_YEAST	C2-C1	-0.10705	0.321388	-0.333087	8	0.74763	0.999512	NA	0	0
sp|P07143|CY1_YEAST	C2-C1	-0.0742528	0.124614	-0.595862	8	0.567739	0.999512	NA	0	0
sp|P07149|FAS1_YEAST	C2-C1	-0.00190512	0.0314397	-0.060596	8	0.953167	0.999512	NA	0.00165017	0.00165017
sp|P07170|KAD2_YEAST	C2-C1	-0.0407802	0.161481	-0.252538	8	0.806993	0.999512	NA	0	0
sp|P07172|HIS8_YEAST	C2-C1	-0.0737555	0.168888	-0.436713	8	0.673867	0.999512	NA	0.0138889	0.0138889
sp|P07213|TOM70_YEAST	C2-C1	0.026919	0.0444829	0.605155	8	0.561845	0.999512	NA	0	0
sp|P07236|SYTM_YEAST	C2-C1	1.73376	0.975447	1.7774	8	0.113399	0.999512	NA	0	0
sp|P07244|PUR2_YEAST	C2-C1	0.00171527	0.0562188	0.0305105	8	0.976407	0.999512	NA	0.00724638	0.00724638
sp|P07245|C1TC_YEAST	C2-C1	-0.0507317	0.037553	-1.35094	8	0.213679	0.999512	NA	0	0
sp|P07246|ADH3_YEAST	C2-C1	0.0195745	0.0924622	0.211702	8	0.837633	0.999512	NA	0	0
sp|P07251|ATPA_YEAST	C2-C1	-0.00408708	0.0438919	-0.0931171	8	0.9281	0.999512	NA	0	0
sp|P07253|CBP6_YEAST	C2-C1	0.147426	0.268463	0.549148	8	0.597893	0.999512	NA	0	0
sp|P07255|COX9_YEAST	C2-C1	0.00994274	0.152582	0.0651633	8	0.949643	0.999512	NA	0	0
sp|P07256|QCR1_YEAST	C2-C1	-0.0415054	0.0371584	-1.11698	8	0.296422	0.999512	NA	0	0
sp|P07257|QCR2_YEAST	C2-C1	0.0109948	0.0534981	0.205518	8	0.842301	0.999512	NA	0	0
sp|P07258|CARA_YEAST	C2-C1	-0.140026	0.0895546	-1.56358	8	0.156544	0.999512	NA	0	0
sp|P07259|PYR1_YEAST	C2-C1	-0.00455738	0.0426945	-0.106744	8	0.91762	0.999512	NA	0	0
sp|P07260|IF4E_YEAST	C2-C1	-0.0302171	0.101661	-0.297235	8	0.773859	0.999512	NA	0	0
sp|P07262|DHE4_YEAST	C2-C1	0.0167705	0.0559883	0.299536	8	0.772165	0.999512	NA	0	0
sp|P07263|SYH_YEAST	C2-C1	-0.0646537	0.0557326	-1.16007	8	0.279468	0.999512	NA	0.015873	0.015873
sp|P07264|LEUC_YEAST	C2-C1	0.0216159	0.0400641	0.539533	8	0.604207	0.999512	NA	0	0
sp|P07266|MRS1_YEAST	C2-C1	-0.278378	0.204759	-1.35954	8	0.211054	0.999512	NA	0	0
sp|P07267|CARP_YEAST	C2-C1	0.0200469	0.0491057	0.40824	8	0.693806	0.999512	NA	0	0
sp|P07269|PHO2_YEAST	C2-C1	0.0460403	0.274672	0.167619	8	0.871043	0.999512	NA	0	0
sp|P07270|PHO4_YEAST	C2-C1	-0.0618771	0.174273	-0.355058	8	0.731725	0.999512	NA	0	0
sp|P07271|PIF1_YEAST	C2-C1	0.42002	0.430726	0.975143	8	0.35805	0.999512	NA	0	0
sp|P07273|TFS2_YEAST	C2-C1	-0.0624784	0.106749	-0.585282	8	0.574492	0.999512	NA	0	0
sp|P07274|PROF_YEAST	C2-C1	-0.211048	0.262906	-0.802749	8	0.445311	0.999512	NA	0	0
sp|P07275|PUT2_YEAST	C2-C1	-0.0785834	0.0401242	-1.9585	8	0.0858563	0.999512	NA	0	0
sp|P07276|RAD2_YEAST	C2-C1	-0.159179	0.860982	-0.184881	8	0.857924	0.999512	NA	0	0
sp|P07277|KIME_YEAST	C2-C1	0.0369243	0.0764501	0.482985	8	0.642046	0.999512	NA	0	0
sp|P07278|KAPR_YEAST	C2-C1	0.0678652	0.0817312	0.830346	8	0.430424	0.999512	NA	0	0
sp|P07283|PMM_YEAST	C2-C1	-0.0131	0.0624445	-0.209787	8	0.839078	0.999512	NA	0	0
sp|P07284|SYSC_YEAST	C2-C1	0.0364251	0.0581619	0.62627	8	0.548586	0.999512	NA	0	0
sp|P07285|TRPD_YEAST	C2-C1	0.0802938	0.0659238	1.21798	8	0.257933	0.999512	NA	0	0
sp|P07342|ILVB_YEAST	C2-C1	4.3e-05	0.0626253	0.000687131	8	0.999469	0.999734	NA	0	0
sp|P07347|ARD1_YEAST	C2-C1	-0.0209069	0.122535	-0.170619	8	0.868759	0.999512	NA	0	0
sp|P07390|PT494_YEAST	C2-C1	-0.145799	0.224052	-0.65074	8	0.533454	0.999512	NA	0	0
sp|P07560|SEC4_YEAST	C2-C1	0.0174693	0.0295101	0.591977	8	0.570213	0.999512	NA	0	0
sp|P07702|LYS2_YEAST	C2-C1	-0.00669323	0.0757266	-0.0883867	8	0.931742	0.999512	NA	0	0
sp|P07703|RPAC1_YEAST	C2-C1	-0.022531	0.0792725	-0.284222	8	0.783458	0.999512	NA	0	0
sp|P07806|SYV_YEAST	C2-C1	0.0316853	0.0671571	0.471808	8	0.649664	0.999512	NA	0	0
sp|P07807|DYR_YEAST	C2-C1	0.109139	0.128729	0.847817	8	0.42118	0.999512	NA	0	0
sp|P07834|CDC4_YEAST	C2-C1	2.48146	1.42292	1.74392	8	0.11933	0.999512	NA	0	0
sp|P07866|LTE1_YEAST	C2-C1	-0.0630813	0.359095	-0.175668	8	0.86492	0.999512	NA	0	0
sp|P07884|MOD5_YEAST	C2-C1	-0.602043	0.40722	-1.47842	8	0.177552	0.999512	NA	0	0
sp|P07991|OAT_YEAST	C2-C1	-0.0804783	0.0386134	-2.08421	8	0.0706518	0.999512	NA	0	0
sp|P08004|CHS1_YEAST	C2-C1	0.0850135	0.0704071	1.20746	8	0.261741	0.999512	NA	0	0
sp|P08018|PBS2_YEAST	C2-C1	-0.0139768	0.189653	-0.0736966	8	0.943061	0.999512	NA	0	0
sp|P08067|UCRI_YEAST	C2-C1	0.00910091	0.063801	0.142645	8	0.890098	0.999512	NA	0	0
sp|P08417|FUMH_YEAST	C2-C1	0.0142393	0.0563478	0.252703	8	0.806869	0.999512	NA	0	0
sp|P08425|SYFM_YEAST	C2-C1	-0.292875	0.54491	-0.537474	8	0.605563	0.999512	NA	0	0
sp|P08432|DCOR_YEAST	C2-C1	-0.150981	0.385542	-0.391607	8	0.705573	0.999512	NA	0	0
sp|P08456|PSS_YEAST	C2-C1	0.0169166	0.0720512	0.234785	8	0.820273	0.999512	NA	0	0
sp|P08459|SPS2_YEAST	C2-C1	0.30115	0.643096	0.468282	8	0.652077	0.999512	NA	0	0
sp|P08466|NUC1_YEAST	C2-C1	0.197734	0.162812	1.2145	8	0.259188	0.999512	NA	0	0
sp|P08518|RPB2_YEAST	C2-C1	0.0106775	0.063496	0.16816	8	0.870631	0.999512	NA	0	0
sp|P08524|FPPS_YEAST	C2-C1	0.0190605	0.0795314	0.23966	8	0.81662	0.999512	NA	0	0
sp|P08525|QCR8_YEAST	C2-C1	-0.400675	0.372373	-1.076	7	0.317607	0.999512	NA	0	0
sp|P08536|MET3_YEAST	C2-C1	0.103169	1.733	0.0595319	8	0.953989	0.999512	NA	0	0
sp|P08539|GPA1_YEAST	C2-C1	0.0550029	0.0834208	0.659343	8	0.528195	0.999512	NA	0	0
sp|P08566|ARO1_YEAST	C2-C1	0.0129575	0.0559755	0.231486	8	0.822748	0.999512	NA	0.00273224	0.00273224
sp|P08638|LEUR_YEAST	C2-C1	-1.26985	0.995209	-1.27597	8	0.237765	0.999512	NA	0	0
sp|P08678|CYAA_YEAST	C2-C1	0.0594495	0.0867321	0.685438	8	0.512436	0.999512	NA	0.0111111	0.0111111
sp|P08679|CISY2_YEAST	C2-C1	0.342954	0.690419	0.496733	8	0.632738	0.999512	NA	0.0555556	0.0555556
sp|P08964|MYO1_YEAST	C2-C1	-0.0556278	0.0742827	-0.748866	8	0.475377	0.999512	NA	0.0151515	0.0151515
sp|P09032|EI2BG_YEAST	C2-C1	0.027009	0.0994706	0.271528	8	0.79286	0.999512	NA	0	0
sp|P09064|IF2B_YEAST	C2-C1	-0.0806682	0.0994225	-0.811368	8	0.440624	0.999512	NA	0	0
sp|P09119|CDC6_YEAST	C2-C1	0.563349	0.469363	1.20024	8	0.264378	0.999512	NA	0	0
sp|P09232|PRTB_YEAST	C2-C1	-0.309152	0.169767	-1.82104	8	0.106083	0.999512	NA	0	0
sp|P09435|HSP73_YEAST	C2-C1	1.96807	1.46583	1.34263	8	0.216241	0.999512	NA	0	0
sp|P09436|SYIC_YEAST	C2-C1	-0.0146888	0.04687	-0.313394	8	0.761997	0.999512	NA	0	0
sp|P09440|C1TM_YEAST	C2-C1	-0.0160981	0.0397226	-0.405264	8	0.695905	0.999512	NA	0	0
sp|P09457|ATPO_YEAST	C2-C1	0.00696705	0.0404557	0.172215	8	0.867546	0.999512	NA	0	0
sp|P09547|SWI1_YEAST	C2-C1	-0.00807827	0.103502	-0.0780494	8	0.939706	0.999512	NA	0.0555556	0.0555556
sp|P09620|KEX1_YEAST	C2-C1	0.0196191	0.0724717	0.270714	8	0.793464	0.999512	NA	0	0
sp|P09624|DLDH_YEAST	C2-C1	-0.016229	0.0519202	-0.312575	8	0.762596	0.999512	NA	0.00694444	0.00694444
sp|P09733|TBA1_YEAST	C2-C1	0.0441078	0.081543	0.540915	8	0.603297	0.999512	NA	0	0
sp|P09734|TBA3_YEAST	C2-C1	0.0827085	0.0539481	1.53311	8	0.163789	0.999512	NA	0	0
sp|P09798|CDC16_YEAST	C2-C1	-0.217107	0.568544	-0.381866	8	0.712504	0.999512	NA	0	0
sp|P09880|TRNL_YEAST	C2-C1	-0.0151322	0.0669131	-0.226147	8	0.826758	0.999512	NA	0	0
sp|P09937|SPS4_YEAST	C2-C1	-0.720682	1.79731	-0.400978	8	0.698933	0.999512	NA	0	0
sp|P09938|RIR2_YEAST	C2-C1	-0.0398125	0.0470988	-0.845297	8	0.422504	0.999512	NA	0	0
sp|P09950|HEM1_YEAST	C2-C1	-0.201672	0.229151	-0.880082	8	0.404476	0.999512	NA	0	0
sp|P09959|SWI6_YEAST	C2-C1	0.0104587	0.120818	0.0865661	8	0.933144	0.999512	NA	0	0
sp|P0C0V8|RS21A_YEAST	C2-C1	0.291353	0.223802	1.30183	8	0.229206	0.999512	NA	0	0
sp|P0C2H8|RL31A_YEAST	C2-C1	-0.358204	0.242953	-1.47437	8	0.178611	0.999512	NA	0	0
sp|P0C2H9|RL31B_YEAST	C2-C1	-0.441784	0.283228	-1.55982	8	0.157423	0.999512	NA	0	0
sp|P0C5N3|YG41A_YEAST	C2-C1	1.42782	1.49671	0.953973	8	0.368029	0.999512	NA	0	0
sp|P0C5P5|YK165_YEAST	C2-C1	0.39959	0.67006	0.596349	8	0.567429	0.999512	NA	0	0
sp|P0CS90|HSP77_YEAST	C2-C1	-0.0337217	0.0423563	-0.796144	8	0.448926	0.999512	NA	0	0
sp|P0CT04|IPB2_YEAST	C2-C1	0.0890196	0.0923817	0.963607	8	0.363462	0.999512	NA	0	0
sp|P10080|SSBP1_YEAST	C2-C1	-0.0119629	0.150739	-0.0793615	8	0.938694	0.999512	NA	0	0
sp|P10081|IF4A_YEAST	C2-C1	-0.0051378	0.0729554	-0.0704239	8	0.945585	0.999512	NA	0	0
sp|P10127|ADH4_YEAST	C2-C1	0.0196127	0.047896	0.409486	8	0.692928	0.999512	NA	0	0
sp|P10356|YEY2_YEAST	C2-C1	0.0788207	0.1894	0.416161	8	0.688233	0.999512	NA	0.0238095	0.0238095
sp|P10363|PRI1_YEAST	C2-C1	-0.12432	0.129307	-0.961433	8	0.364489	0.999512	NA	0.0333333	0.0333333
sp|P10507|MPPB_YEAST	C2-C1	0.00707475	0.12362	0.0572296	8	0.955766	0.999512	NA	0	0
sp|P10591|HSP71_YEAST	C2-C1	0.0501758	0.104419	0.480524	8	0.64372	0.999512	NA	0	0
sp|P10592|HSP72_YEAST	C2-C1	-0.0460131	0.09503	-0.484196	8	0.641224	0.999512	NA	0	0
sp|P10614|CP51_YEAST	C2-C1	0.0407916	0.0738208	0.552577	8	0.595651	0.999512	NA	0	0
sp|P10622|RLA3_YEAST	C2-C1	-0.183385	0.189853	-0.965934	8	0.362366	0.999512	NA	0	0
sp|P10659|METK1_YEAST	C2-C1	-0.00876412	0.065269	-0.134277	8	0.8965	0.999512	NA	0	0
sp|P10662|RT01_YEAST	C2-C1	-0.00988725	0.0457318	-0.216201	8	0.834242	0.999512	NA	0	0
sp|P10663|RT02_YEAST	C2-C1	0.806948	0.64272	1.25552	8	0.244719	0.999512	NA	0	0
sp|P10664|RL4A_YEAST	C2-C1	0.146708	0.118055	1.24271	8	0.249163	0.999512	NA	0	0
sp|P10823|GPA2_YEAST	C2-C1	-0.185171	0.17801	-1.04023	8	0.328647	0.999512	NA	0	0
sp|P10834|PET54_YEAST	C2-C1	-0.0836775	3.11488	-0.0268638	8	0.979226	0.999512	NA	0	0
sp|P10849|MTF2_YEAST	C2-C1	-0.797594	0.583749	-1.36633	8	0.209002	0.999512	NA	0	0
sp|P10863|TIR1_YEAST	C2-C1	1.24165	1.44966	0.856506	8	0.416634	0.999512	NA	0	0
sp|P10869|AK_YEAST	C2-C1	0.00818783	0.0580846	0.140964	8	0.891383	0.999512	NA	0	0
sp|P10961|HSF_YEAST	C2-C1	0.577271	0.177756	3.24754	8	0.0117442	0.999512	NA	0.0277778	0.0277778
sp|P10962|MAK16_YEAST	C2-C1	-0.0651843	0.0909685	-0.716559	8	0.494031	0.999512	NA	0	0
sp|P10964|RPA1_YEAST	C2-C1	-0.011762	0.0249877	-0.470714	8	0.650412	0.999512	NA	0	0
sp|P11075|SEC7_YEAST	C2-C1	-0.0435865	0.0455825	-0.956212	8	0.366964	0.999512	NA	0	0
sp|P11076|ARF1_YEAST	C2-C1	-0.41053	0.157631	-2.60437	8	0.0314039	0.999512	NA	0	0
sp|P11154|PYC1_YEAST	C2-C1	0.0950405	0.171013	0.55575	8	0.593579	0.999512	NA	0	0
sp|P11325|SYLM_YEAST	C2-C1	0.10483	0.263279	0.398169	8	0.70092	0.999512	NA	0	0
sp|P11353|HEM6_YEAST	C2-C1	-0.167497	0.0765246	-2.18879	8	0.0600338	0.999512	NA	0	0
sp|P11412|G6PD_YEAST	C2-C1	-0.0696723	0.0586129	-1.18869	8	0.268649	0.999512	NA	0	0
sp|P11433|CDC24_YEAST	C2-C1	0.0784828	0.0951002	0.825264	8	0.433139	0.999512	NA	0	0
sp|P11484|HSP75_YEAST	C2-C1	0.0269081	0.0852636	0.315587	8	0.760391	0.999512	NA	0	0
sp|P11491|PPB_YEAST	C2-C1	0.0611539	0.0707595	0.86425	8	0.412612	0.999512	NA	0	0
sp|P11632|NHP6A_YEAST	C2-C1	0.0704084	0.14408	0.488675	8	0.638186	0.999512	NA	0	0
sp|P11633|NHP6B_YEAST	C2-C1	0.33192	0.448825	0.73953	8	0.48072	0.999512	NA	0	0
sp|P11655|SEC12_YEAST	C2-C1	-0.0841874	0.0975562	-0.862963	8	0.413279	0.999512	NA	0	0
sp|P11745|RNA1_YEAST	C2-C1	-0.0766867	0.0706372	-1.08564	8	0.309265	0.999512	NA	0	0
sp|P11746|MCM1_YEAST	C2-C1	-0.343236	0.401974	-0.853875	8	0.418007	0.999512	NA	0	0
sp|P11792|SCH9_YEAST	C2-C1	0.00267556	0.198268	0.0134947	8	0.989564	0.999512	NA	0	0
sp|P11914|MPPA_YEAST	C2-C1	0.029184	0.0906123	0.322075	8	0.755651	0.999512	NA	0	0
sp|P11938|RAP1_YEAST	C2-C1	-0.0523907	0.0611634	-0.856569	8	0.416601	0.999512	NA	0	0
sp|P11972|SST2_YEAST	C2-C1	-0.0615904	0.0737767	-0.834821	8	0.428043	0.999512	NA	0	0
sp|P11978|SIR4_YEAST	C2-C1	-0.380548	0.248142	-1.53359	8	0.163673	0.999512	NA	0	0
sp|P12383|PDR1_YEAST	C2-C1	0.131956	0.132393	0.996696	8	0.3481	0.999512	NA	0	0
sp|P12385|ERF1_YEAST	C2-C1	0.0138666	0.0480711	0.28846	8	0.780328	0.999512	NA	0	0
sp|P12611|WHI2_YEAST	C2-C1	-0.179741	0.255572	-0.70329	8	0.501826	0.999512	NA	0	0
sp|P12612|TCPA_YEAST	C2-C1	-0.0103381	0.0413764	-0.249855	8	0.808996	0.999512	NA	0	0
sp|P12630|BAR1_YEAST	C2-C1	-0.0046474	0.0607808	-0.0764617	8	0.940929	0.999512	NA	0	0
sp|P12683|HMDH1_YEAST	C2-C1	0.0166033	0.044084	0.376628	8	0.716243	0.999512	NA	0	0
sp|P12684|HMDH2_YEAST	C2-C1	-0.0704523	0.04736	-1.48759	8	0.175176	0.999512	NA	0	0
sp|P12686|RT13_YEAST	C2-C1	-0.297649	0.245078	-1.21451	8	0.259184	0.999512	NA	0	0
sp|P12687|RM02_YEAST	C2-C1	0.343009	0.213854	1.60393	8	0.147396	0.999512	NA	0	0
sp|P12688|YPK1_YEAST	C2-C1	0.0114361	0.0820601	0.139362	8	0.892609	0.999512	NA	0	0
sp|P12689|REV1_YEAST	C2-C1	0.768083	0.772671	0.994062	8	0.349305	0.999512	NA	0	0
sp|P12695|ODP2_YEAST	C2-C1	0.0547512	0.058884	0.929815	8	0.379669	0.999512	NA	0	0
sp|P12709|G6PI_YEAST	C2-C1	0.0230099	0.0329005	0.699378	8	0.504139	0.999512	NA	0.0190476	0.0190476
sp|P12753|RAD50_YEAST	C2-C1	0.128424	0.377188	0.340476	8	0.742266	0.999512	NA	0	0
sp|P12754|EI2BD_YEAST	C2-C1	-0.00855631	0.0652129	-0.131206	8	0.898852	0.999512	NA	0.047619	0.047619
sp|P12866|STE6_YEAST	C2-C1	0.00575562	0.289318	0.0198937	8	0.984615	0.999512	NA	0	0
sp|P12868|PEP5_YEAST	C2-C1	-0.218512	0.104826	-2.08452	8	0.0706173	0.999512	NA	0	0
sp|P12887|UNG_YEAST	C2-C1	-0.0285782	0.103688	-0.275618	8	0.789827	0.999512	NA	0	0
sp|P12904|AAKG_YEAST	C2-C1	0.154507	0.085502	1.80705	8	0.108378	0.999512	NA	0	0
sp|P12945|NAT1_YEAST	C2-C1	-0.0148623	0.0574147	-0.258858	8	0.802281	0.999512	NA	0	0
sp|P12954|SRS2_YEAST	C2-C1	-0.670462	0.652751	-1.02713	8	0.334409	0.999512	NA	0	0
sp|P12962|CAF20_YEAST	C2-C1	0.184959	0.287644	0.643014	8	0.538204	0.999512	NA	0	0
sp|P13134|KEX2_YEAST	C2-C1	-0.0511667	0.26498	-0.193097	8	0.851695	0.999512	NA	0	0
sp|P13185|KIN1_YEAST	C2-C1	0.0401817	0.126324	0.318084	8	0.758566	0.999512	NA	0	0
sp|P13186|KIN2_YEAST	C2-C1	-0.116941	0.285797	-0.409174	8	0.693147	0.999512	NA	0.0333333	0.0333333
sp|P13188|SYQ_YEAST	C2-C1	0.0386052	0.0595334	0.648462	8	0.534852	0.999512	NA	0.00347222	0.00347222
sp|P13259|PCY1_YEAST	C2-C1	0.22287	0.161518	1.37984	8	0.204969	0.999512	NA	0	0
sp|P13298|PYRE_YEAST	C2-C1	-0.0618566	0.0950688	-0.650651	8	0.533509	0.999512	NA	0	0
sp|P13382|DPOA_YEAST	C2-C1	0.0308086	0.125744	0.245011	8	0.812616	0.999512	NA	0.0111111	0.0111111
sp|P13393|TBP_YEAST	C2-C1	-0.0442532	0.0794576	-0.55694	8	0.592803	0.999512	NA	0	0
sp|P13433|RPOM_YEAST	C2-C1	0.427847	0.270292	1.58291	8	0.1521	0.999512	NA	0.0185185	0.0185185
sp|P13517|CAPZB_YEAST	C2-C1	-0.0725693	0.0781458	-0.92864	8	0.380242	0.999512	NA	0	0
sp|P13574|STE12_YEAST	C2-C1	0.0605221	0.0571222	1.05952	8	0.320301	0.999512	NA	0	0
sp|P13586|ATC1_YEAST	C2-C1	-0.0503922	0.0918071	-0.548892	8	0.598061	0.999512	NA	0	0
sp|P13663|DHAS_YEAST	C2-C1	-0.0175394	0.034908	-0.502446	8	0.62889	0.999512	NA	0	0
sp|P13712|MSI1_YEAST	C2-C1	0.154724	0.184819	0.837167	8	0.426798	0.999512	NA	0	0
sp|P13856|RSR1_YEAST	C2-C1	-0.130596	0.0878152	-1.48717	8	0.175285	0.999512	NA	0	0
sp|P14020|DPM1_YEAST	C2-C1	0.0113226	0.110084	0.102854	8	0.92061	0.999512	NA	0	0
sp|P14063|RM31_YEAST	C2-C1	-0.242733	0.299666	-0.810012	8	0.44136	0.999512	NA	0	0
sp|P14065|GCY1_YEAST	C2-C1	0.0400787	0.123258	0.325162	8	0.753399	0.999512	NA	0	0
sp|P14120|RL30_YEAST	C2-C1	-0.0691431	0.0866331	-0.798114	8	0.447846	0.999512	NA	0	0
sp|P14126|RL3_YEAST	C2-C1	-0.142127	0.112917	-1.25869	8	0.24363	0.999512	NA	0	0
sp|P14164|ABF1_YEAST	C2-C1	0.0695366	0.12733	0.546113	8	0.599882	0.999512	NA	0	0
sp|P14306|CPYI_YEAST	C2-C1	-0.137421	0.091498	-1.5019	8	0.171523	0.999512	NA	0	0
sp|P14540|ALF_YEAST	C2-C1	0.0788937	0.0731235	1.07891	8	0.31208	0.999512	NA	0	0
sp|P14680|YAK1_YEAST	C2-C1	0.216602	0.897453	0.241352	8	0.815353	0.999512	NA	0	0
sp|P14681|KSS1_YEAST	C2-C1	-0.0424601	0.209051	-0.203108	8	0.844121	0.999512	NA	0	0
sp|P14682|UBC3_YEAST	C2-C1	-0.0490762	0.0897368	-0.54689	8	0.599373	0.999512	NA	0	0
sp|P14693|SAM35_YEAST	C2-C1	0.0356112	0.267026	0.133362	8	0.897201	0.999512	NA	0.0333333	0.0333333
sp|P14736|RAD4_YEAST	C2-C1	0.452661	0.532297	0.850393	8	0.419829	0.999512	NA	0	0
sp|P14741|EI2BA_YEAST	C2-C1	-0.0329455	0.110031	-0.29942	8	0.772251	0.999512	NA	0	0
sp|P14742|GFA1_YEAST	C2-C1	0.0573662	0.0614399	0.933696	8	0.377781	0.999512	NA	0.00520833	0.00520833
sp|P14743|NMT_YEAST	C2-C1	-0.00300316	0.106488	-0.0282019	8	0.978192	0.999512	NA	0	0
sp|P14747|PP2B2_YEAST	C2-C1	-0.0743498	0.204589	-0.363412	8	0.725713	0.999512	NA	0.0166667	0.0166667
sp|P14772|BPT1_YEAST	C2-C1	0.107722	0.0887403	1.21391	8	0.259401	0.999512	NA	0	0
sp|P14832|CYPH_YEAST	C2-C1	-0.0326819	0.0734092	-0.445201	8	0.667975	0.999512	NA	0	0
sp|P14843|AROF_YEAST	C2-C1	-0.00342844	0.0895337	-0.0382921	8	0.970393	0.999512	NA	0.0151515	0.0151515
sp|P14904|AMPL_YEAST	C2-C1	-0.0179132	0.0916538	-0.195444	8	0.849918	0.999512	NA	0	0
sp|P14906|SEC63_YEAST	C2-C1	0.107419	0.0727875	1.47579	8	0.178241	0.999512	NA	0	0
sp|P14907|NSP1_YEAST	C2-C1	0.0266214	0.0529686	0.502588	8	0.628795	0.999512	NA	0	0
sp|P14908|MTF1_YEAST	C2-C1	-0.83002	0.515016	-1.61164	8	0.145706	0.999512	NA	0	0
sp|P14922|CYC8_YEAST	C2-C1	-0.0106986	0.0915846	-0.116817	8	0.909884	0.999512	NA	0	0
sp|P15019|TAL1_YEAST	C2-C1	0.00593167	0.056339	0.105285	8	0.918741	0.999512	NA	0	0
sp|P15108|HSC82_YEAST	C2-C1	-0.0921241	0.0924081	-0.996927	8	0.347995	0.999512	NA	0	0
sp|P15179|SYDM_YEAST	C2-C1	-0.318473	0.745904	-0.426963	8	0.680665	0.999512	NA	0	0
sp|P15180|SYKC_YEAST	C2-C1	-0.0113384	0.0614277	-0.184581	8	0.858151	0.999512	NA	0	0
sp|P15274|AMPD_YEAST	C2-C1	-0.00543782	0.050813	-0.107016	8	0.917411	0.999512	NA	0	0
sp|P15303|SEC23_YEAST	C2-C1	-0.0383941	0.0566702	-0.6775	8	0.517199	0.999512	NA	0.0166667	0.0166667
sp|P15315|CUP2_YEAST	C2-C1	-0.215125	0.305992	-0.703041	8	0.501973	0.999512	NA	0	0
sp|P15367|SEC11_YEAST	C2-C1	-0.171803	0.0830488	-2.0687	8	0.0723748	0.999512	NA	0.0416667	0.0416667
sp|P15424|MS116_YEAST	C2-C1	0.00139747	0.0788543	0.0177222	8	0.986294	0.999512	NA	0	0
sp|P15436|DPOD_YEAST	C2-C1	-0.150043	0.217019	-0.691385	8	0.508886	0.999512	NA	0	0
sp|P15442|GCN2_YEAST	C2-C1	-0.208247	0.156361	-1.33184	8	0.219608	0.999512	NA	0	0
sp|P15454|KGUA_YEAST	C2-C1	0.0269746	0.0474924	0.567976	8	0.585635	0.999512	NA	0.0185185	0.0185185
sp|P15496|IDI1_YEAST	C2-C1	0.0366806	0.104281	0.351748	8	0.734112	0.999512	NA	0	0
sp|P15565|TRM1_YEAST	C2-C1	0.0732748	0.0628897	1.16513	8	0.277528	0.999512	NA	0.0111111	0.0111111
sp|P15624|SYFB_YEAST	C2-C1	0.0245938	0.0743735	0.33068	8	0.749381	0.999512	NA	0	0
sp|P15625|SYFA_YEAST	C2-C1	-0.0077561	0.0488308	-0.158836	8	0.877734	0.999512	NA	0.00694444	0.00694444
sp|P15646|FBRL_YEAST	C2-C1	-0.0271465	0.159938	-0.169732	8	0.869435	0.999512	NA	0.00980392	0.00980392
sp|P15700|KCY_YEAST	C2-C1	-0.108163	0.0475366	-2.27536	8	0.0524498	0.999512	NA	0	0
sp|P15703|BGL2_YEAST	C2-C1	0.0476128	0.043309	1.09938	8	0.303584	0.999512	NA	0	0
sp|P15705|STI1_YEAST	C2-C1	-0.0421186	0.119418	-0.352698	8	0.733427	0.999512	NA	0	0
sp|P15731|UBC4_YEAST	C2-C1	-0.821844	0.645744	-1.27271	8	0.238861	0.999512	NA	0	0
sp|P15790|CSK21_YEAST	C2-C1	0.33393	0.220591	1.5138	8	0.168537	0.999512	NA	0	0
sp|P15801|DPOG_YEAST	C2-C1	0.117676	0.120189	0.97909	8	0.356212	0.999512	NA	0	0
sp|P15873|PCNA_YEAST	C2-C1	0.0623929	0.0438478	1.42294	8	0.192556	0.999512	NA	0	0
sp|P15891|ABP1_YEAST	C2-C1	-0.0314104	0.0672164	-0.467303	8	0.652747	0.999512	NA	0	0
sp|P15992|HSP26_YEAST	C2-C1	-0.0135884	0.0371151	-0.366116	8	0.723771	0.999512	NA	0	0
sp|P16120|THRC_YEAST	C2-C1	-0.0190433	0.0826279	-0.230471	8	0.82351	0.999512	NA	0	0
sp|P16140|VATB_YEAST	C2-C1	0.0482307	0.0577334	0.835404	8	0.427733	0.999512	NA	0.00793651	0.00793651
sp|P16370|RPB3_YEAST	C2-C1	-0.0938673	0.0779705	-1.20388	8	0.263045	0.999512	NA	0	0
sp|P16387|ODPA_YEAST	C2-C1	0.0102174	0.0731021	0.139769	8	0.892297	0.999512	NA	0	0
sp|P16451|ODPX_YEAST	C2-C1	0.102806	0.0909994	1.12974	8	0.291317	0.999512	NA	0	0
sp|P16467|PDC5_YEAST	C2-C1	-0.0965625	0.149549	-0.645692	8	0.536555	0.999512	NA	0.0128205	0.0128205
sp|P16474|GRP78_YEAST	C2-C1	-0.0937265	0.0722575	-1.29712	8	0.230746	0.999512	NA	0	0
sp|P16521|EF3A_YEAST	C2-C1	0.0345923	0.04252	0.813553	8	0.439442	0.999512	NA	0.00462963	0.00462963
sp|P16547|OM45_YEAST	C2-C1	-0.0859962	0.217905	-0.39465	8	0.703414	0.999512	NA	0	0
sp|P16550|APA1_YEAST	C2-C1	-0.0543573	0.0454846	-1.19507	8	0.266283	0.999512	NA	0	0
sp|P16603|NCPR_YEAST	C2-C1	0.0152914	0.0262948	0.581535	8	0.576894	0.999512	NA	0.0151515	0.0151515
sp|P16622|HEMH_YEAST	C2-C1	-0.126797	0.0596756	-2.12477	8	0.0663309	0.999512	NA	0	0
sp|P16639|ATE1_YEAST	C2-C1	-2.197	2.24566	-0.978331	8	0.356564	0.999512	NA	0	0
sp|P16649|TUP1_YEAST	C2-C1	0.0106391	0.103154	0.103138	8	0.920392	0.999512	NA	0	0
sp|P16661|ALG1_YEAST	C2-C1	-0.108276	0.276213	-0.392	8	0.705294	0.999512	NA	0	0
sp|P16664|RGP1_YEAST	C2-C1	1.58083	2.29185	0.689762	8	0.509854	0.999512	NA	0	0
sp|P16861|PFKA1_YEAST	C2-C1	-0.037605	0.0246998	-1.52248	8	0.166386	0.999512	NA	0	0
sp|P16862|PFKA2_YEAST	C2-C1	-0.0722984	0.110347	-0.655189	8	0.53073	0.999512	NA	0	0
sp|P16892|FUS3_YEAST	C2-C1	0.0712011	0.107652	0.661402	8	0.526941	0.999512	NA	0	0
sp|P17064|FCY2_YEAST	C2-C1	0.155265	0.243479	0.637692	8	0.541492	0.999512	NA	0	0
sp|P17065|SEC2_YEAST	C2-C1	-0.674184	1.08678	-0.620352	8	0.552284	0.999512	NA	0	0
sp|P17076|RL8A_YEAST	C2-C1	0.0145531	0.195482	0.0744471	8	0.942482	0.999512	NA	0	0
sp|P17106|CBF1_YEAST	C2-C1	-0.0190508	0.119497	-0.159424	8	0.877286	0.999512	NA	0	0
sp|P17121|SAC7_YEAST	C2-C1	1.05056	0.908254	1.15668	8	0.280771	0.999512	NA	0	0
sp|P17157|PHO85_YEAST	C2-C1	-0.0808387	0.215694	-0.374784	8	0.717562	0.999512	NA	0	0
sp|P17255|VATA_YEAST	C2-C1	0.0387889	0.041334	0.938426	8	0.375489	0.999512	NA	0	0
sp|P17423|KHSE_YEAST	C2-C1	0.0409561	0.055692	0.735404	8	0.483094	0.999512	NA	0	0
sp|P17442|PHO81_YEAST	C2-C1	-0.028801	0.0675941	-0.426087	8	0.681277	0.999512	NA	0	0
sp|P17505|MDHM_YEAST	C2-C1	-0.0948595	0.071849	-1.32026	8	0.223269	0.999512	NA	0	0
sp|P17536|TPM1_YEAST	C2-C1	-0.209371	0.203399	-1.02936	8	0.333424	0.999512	NA	0	0
sp|P17555|CAP_YEAST	C2-C1	-0.0489949	0.0554038	-0.884324	8	0.402316	0.999512	NA	0.00724638	0.00724638
sp|P17558|RTPT_YEAST	C2-C1	-0.126739	0.173928	-0.728686	8	0.486975	0.999512	NA	0	0
sp|P17629|HPR1_YEAST	C2-C1	0.0736382	0.147224	0.500178	8	0.630417	0.999512	NA	0	0
sp|P17649|GABAT_YEAST	C2-C1	0.0878231	0.0392102	2.2398	8	0.0554425	0.999512	NA	0	0
sp|P17695|GLRX2_YEAST	C2-C1	-0.312877	0.227227	-1.37694	8	0.205831	0.999512	NA	0	0
sp|P17709|HXKG_YEAST	C2-C1	0.0495333	0.0616719	0.803176	8	0.445079	0.999512	NA	0	0
sp|P17883|SKI3_YEAST	C2-C1	-0.027948	0.0386168	-0.723726	8	0.489853	0.999512	NA	0	0
sp|P17890|RPC7_YEAST	C2-C1	0.0382015	0.164804	0.231799	8	0.822513	0.999512	NA	0	0
sp|P17891|CLC1_YEAST	C2-C1	0.0680585	0.120161	0.566392	8	0.586661	0.999512	NA	0	0
sp|P17898|CPT1_YEAST	C2-C1	0.6118	0.886347	0.690249	8	0.509563	0.999512	NA	0	0
sp|P17967|PDI_YEAST	C2-C1	0.0420532	0.0568664	0.739509	8	0.480732	0.999512	NA	0.0104167	0.0104167
sp|P18238|ADT3_YEAST	C2-C1	0.13949	0.314312	0.443796	8	0.668948	0.999512	NA	0	0
sp|P18239|ADT2_YEAST	C2-C1	-0.0152299	0.0736582	-0.206764	8	0.841359	0.999512	NA	0	0
sp|P18411|FUN14_YEAST	C2-C1	0.174399	0.285866	0.610071	8	0.558742	0.999512	NA	0	0
sp|P18414|ERD2_YEAST	C2-C1	-1.61268	2.79124	-0.577763	8	0.579318	0.999512	NA	0	0
sp|P18480|SNF5_YEAST	C2-C1	-0.027622	0.173881	-0.158856	8	0.877719	0.999512	NA	0.0277778	0.0277778
sp|P18494|GLN3_YEAST	C2-C1	0.221747	1.17344	0.188972	8	0.854821	0.999512	NA	0	0
sp|P18496|ATP10_YEAST	C2-C1	0.129794	0.161755	0.802414	8	0.445494	0.999512	NA	0	0
sp|P18544|ARGD_YEAST	C2-C1	-0.188676	0.348406	-0.541542	8	0.602885	0.999512	NA	0	0
sp|P18562|UPP_YEAST	C2-C1	0.0141732	0.0645849	0.219451	8	0.831795	0.999512	NA	0	0
sp|P18759|SEC18_YEAST	C2-C1	-0.0460305	0.0704865	-0.65304	8	0.532045	0.999512	NA	0	0
sp|P18851|GBB_YEAST	C2-C1	0.0808515	0.151849	0.532448	8	0.608882	0.999512	NA	0	0
sp|P18852|GBG_YEAST	C2-C1	-0.122378	0.185863	-0.658428	8	0.528753	0.999512	NA	0	0
sp|P18888|SNF6_YEAST	C2-C1	-0.209918	0.172957	-1.2137	8	0.259475	0.999512	NA	0	0
sp|P18898|PGTB1_YEAST	C2-C1	0.181905	0.825451	0.22037	8	0.831102	0.999512	NA	0	0
sp|P18899|DDR48_YEAST	C2-C1	-0.469635	0.305961	-1.53495	8	0.163343	0.999512	NA	0	0
sp|P18900|COQ1_YEAST	C2-C1	-0.101713	0.0902601	-1.12689	8	0.292454	0.999512	NA	0	0
sp|P18961|YPK2_YEAST	C2-C1	0.11667	0.102894	1.13389	8	0.289675	0.999512	NA	0	0
sp|P18962|DAP2_YEAST	C2-C1	0.0712682	0.16733	0.425913	8	0.681399	0.999512	NA	0	0
sp|P18963|IRA1_YEAST	C2-C1	0.0189996	0.0873805	0.217435	8	0.833312	0.999512	NA	0	0
sp|P19073|CDC42_YEAST	C2-C1	-0.267003	0.237255	-1.12538	8	0.293054	0.999512	NA	0	0
sp|P19097|FAS2_YEAST	C2-C1	-0.0042887	0.0179881	-0.238419	8	0.81755	0.999512	NA	0.0057971	0.0057971
sp|P19146|ARF2_YEAST	C2-C1	-0.0378098	0.0590069	-0.640768	8	0.53959	0.999512	NA	0	0
sp|P19158|IRA2_YEAST	C2-C1	0.376513	0.17796	2.11571	8	0.0672724	0.999512	NA	0.0416667	0.0416667
sp|P19211|IF5A2_YEAST	C2-C1	-0.1354	0.100618	-1.34569	8	0.215294	0.999512	NA	0	0
sp|P19262|ODO2_YEAST	C2-C1	-0.0480979	0.056003	-0.858845	8	0.415417	0.999512	NA	0	0
sp|P19263|MED14_YEAST	C2-C1	-0.395451	0.13464	-2.93709	8	0.018793	0.999512	NA	0.0185185	0.0185185
sp|P19358|METK2_YEAST	C2-C1	-0.0080749	0.0812024	-0.0994416	8	0.923234	0.999512	NA	0	0
sp|P19414|ACON_YEAST	C2-C1	-0.0546615	0.0482316	-1.13331	8	0.289902	0.999512	NA	0	0
sp|P19454|CSK22_YEAST	C2-C1	0.0415764	0.101128	0.411125	8	0.691774	0.999512	NA	0.0166667	0.0166667
sp|P19524|MYO2_YEAST	C2-C1	0.110224	0.0446524	2.46848	8	0.038802	0.999512	NA	0	0
sp|P19658|EXO70_YEAST	C2-C1	0.0539722	0.103448	0.521732	8	0.615989	0.999512	NA	0	0
sp|P19659|MED15_YEAST	C2-C1	-0.103686	0.14027	-0.739187	8	0.480917	0.999512	NA	0.0185185	0.0185185
sp|P19735|PRP6_YEAST	C2-C1	-0.010928	0.101427	-0.107742	8	0.916854	0.999512	NA	0	0
sp|P19736|PRP9_YEAST	C2-C1	0.154926	0.82635	0.187483	8	0.85595	0.999512	NA	0	0
sp|P19812|UBR1_YEAST	C2-C1	0.0155756	0.145398	0.107124	8	0.917328	0.999512	NA	0.0196078	0.0196078
sp|P19880|YAP1_YEAST	C2-C1	-0.0880689	0.102039	-0.863091	8	0.413213	0.999512	NA	0	0
sp|P19881|PNPP_YEAST	C2-C1	0.0541096	0.0818446	0.661126	8	0.527109	0.999512	NA	0.0128205	0.0128205
sp|P19882|HSP60_YEAST	C2-C1	-0.0167993	0.0411642	-0.408103	8	0.693902	0.999512	NA	0	0
sp|P19955|RT31_YEAST	C2-C1	0.115846	0.181485	0.638323	8	0.541102	0.999512	NA	0	0
sp|P19956|RM44_YEAST	C2-C1	0.576613	0.365645	1.57698	8	0.153452	0.999512	NA	0	0
sp|P20049|TYR1_YEAST	C2-C1	0.00402745	0.151182	0.0266397	8	0.9794	0.999512	NA	0	0
sp|P20051|PYRC_YEAST	C2-C1	0.0559813	0.0669273	0.836449	8	0.427179	0.999512	NA	0	0
sp|P20053|PRP4_YEAST	C2-C1	1.30902	1.74446	0.750385	8	0.474512	0.999512	NA	0	0
sp|P20081|FKBP_YEAST	C2-C1	-0.0438969	0.0799092	-0.549335	8	0.597771	0.999512	NA	0	0
sp|P20084|RM33_YEAST	C2-C1	-0.0427139	0.294013	-0.145279	8	0.888084	0.999512	NA	0	0
sp|P20095|PRP2_YEAST	C2-C1	-1.34176	0.71237	-1.88352	8	0.0963829	0.999512	NA	0	0
sp|P20107|ZRC1_YEAST	C2-C1	-0.016424	0.0890444	-0.184447	8	0.858252	0.999512	NA	0	0
sp|P20133|PGTB2_YEAST	C2-C1	0.123605	0.331475	0.372895	8	0.718913	0.999512	NA	0	0
sp|P20134|SFL1_YEAST	C2-C1	-0.402266	0.391934	-1.02636	8	0.33475	0.999512	NA	0	0
sp|P20424|SRP54_YEAST	C2-C1	-0.0293288	0.0670263	-0.437571	8	0.67327	0.999512	NA	0.00877193	0.00877193
sp|P20433|RPB4_YEAST	C2-C1	0.114202	0.179641	0.635724	8	0.54271	0.999512	NA	0	0
sp|P20434|RPAB1_YEAST	C2-C1	0.120498	0.123206	0.978023	8	0.356708	0.999512	NA	0	0
sp|P20435|RPAB2_YEAST	C2-C1	-0.0634121	0.135376	-0.468413	8	0.651987	0.999512	NA	0	0
sp|P20436|RPAB3_YEAST	C2-C1	0.0322655	0.151871	0.212454	8	0.837066	0.999512	NA	0	0
sp|P20437|CG11_YEAST	C2-C1	0.477346	2.00963	0.23753	8	0.818216	0.999512	NA	0	0
sp|P20447|DBP3_YEAST	C2-C1	0.0250262	0.0574785	0.435401	8	0.674779	0.999512	NA	0	0
sp|P20448|DBP4_YEAST	C2-C1	-0.00481712	0.0511545	-0.0941679	8	0.927292	0.999512	NA	0	0
sp|P20449|DBP5_YEAST	C2-C1	0.0464532	0.0413796	1.12261	8	0.294161	0.999512	NA	0	0
sp|P20457|PRI2_YEAST	C2-C1	-0.344232	0.95953	-0.358751	8	0.729065	0.999512	NA	0	0
sp|P20459|IF2A_YEAST	C2-C1	0.0384419	0.0415832	0.924457	8	0.382287	0.999512	NA	0.0333333	0.0333333
sp|P20484|MAK11_YEAST	C2-C1	0.0111061	0.0736168	0.150864	8	0.883818	0.999512	NA	0	0
sp|P20485|KICH_YEAST	C2-C1	-0.0768361	0.117392	-0.654526	8	0.531136	0.999512	NA	0	0
sp|P20486|CKS1_YEAST	C2-C1	-0.192222	0.0594549	-3.23308	8	0.0120015	0.999512	NA	0	0
sp|P20604|PP11_YEAST	C2-C1	-0.0890071	0.088728	-1.00315	8	0.345164	0.999512	NA	0	0
sp|P20606|SAR1_YEAST	C2-C1	0.0356782	0.0987587	0.361266	8	0.727255	0.999512	NA	0	0
sp|P20676|NUP1_YEAST	C2-C1	0.156994	0.123921	1.26689	8	0.240831	0.999512	NA	0.0128205	0.0128205
sp|P20795|VPS33_YEAST	C2-C1	-0.110841	0.167256	-0.662702	8	0.52615	0.999512	NA	0.0277778	0.0277778
sp|P20967|ODO1_YEAST	C2-C1	-0.0498085	0.0392214	-1.26993	8	0.2398	0.999512	NA	0	0
sp|P21147|ACO1_YEAST	C2-C1	-0.0261586	0.0769469	-0.339957	8	0.742642	0.999512	NA	0.0238095	0.0238095
sp|P21182|DCAM_YEAST	C2-C1	-0.168599	0.1621	-1.04009	8	0.328707	0.999512	NA	0	0
sp|P21192|ACE2_YEAST	C2-C1	-0.810973	0.715798	-1.13296	8	0.29004	0.999512	NA	0	0
sp|P21242|PSA7_YEAST	C2-C1	0.0155207	0.115772	0.134063	8	0.896664	0.999512	NA	0.0208333	0.0208333
sp|P21243|PSA1_YEAST	C2-C1	-0.0281613	0.0600668	-0.468832	8	0.6517	0.999512	NA	0	0
sp|P21264|PUR6_YEAST	C2-C1	0.00734793	0.0665072	0.110483	8	0.914748	0.999512	NA	0	0
sp|P21268|FAR1_YEAST	C2-C1	-0.402363	0.969388	-0.415069	8	0.688999	0.999512	NA	0	0
sp|P21269|CCA1_YEAST	C2-C1	-0.148259	0.0726198	-2.04158	8	0.0754891	0.999512	NA	0.0138889	0.0138889
sp|P21304|PWP1_YEAST	C2-C1	-0.0697706	0.115774	-0.602643	8	0.563434	0.999512	NA	0	0
sp|P21306|ATP5E_YEAST	C2-C1	-0.443256	0.365695	-1.21209	8	0.260058	0.999512	NA	0.0416667	0.0416667
sp|P21339|MSB1_YEAST	C2-C1	0.378885	0.109985	3.44489	8	0.00876041	0.999512	NA	0.0333333	0.0333333
sp|P21372|PRP5_YEAST	C2-C1	-0.285398	0.118317	-2.41215	8	0.0423658	0.999512	NA	0	0
sp|P21373|UTR1_YEAST	C2-C1	-0.147567	0.264338	-0.558249	8	0.59195	0.999512	NA	0.0416667	0.0416667
sp|P21374|ISY1_YEAST	C2-C1	-0.540974	0.416895	-1.29763	8	0.23058	0.999512	NA	0	0
sp|P21375|OSM1_YEAST	C2-C1	0.0116378	0.050676	0.229652	8	0.824125	0.999512	NA	0	0
sp|P21524|RIR1_YEAST	C2-C1	-0.00392814	0.0733729	-0.0535367	8	0.958617	0.999512	NA	0	0
sp|P21538|REB1_YEAST	C2-C1	0.0361331	0.100026	0.361237	8	0.727276	0.999512	NA	0	0
sp|P21560|CBP3_YEAST	C2-C1	0.045521	0.106221	0.428552	8	0.679555	0.999512	NA	0	0
sp|P21576|VPS1_YEAST	C2-C1	-0.0177647	0.0275993	-0.643665	8	0.537803	0.999512	NA	0	0
sp|P21623|DIT1_YEAST	C2-C1	1.11397	0.739432	1.50652	8	0.170358	0.999512	NA	0	0
sp|P21734|UBC1_YEAST	C2-C1	0.0239402	0.119873	0.199714	8	0.846688	0.999512	NA	0	0
sp|P21771|RT28_YEAST	C2-C1	-0.0408674	0.208807	-0.195718	8	0.84971	0.999512	NA	0	0
sp|P21801|SDHB_YEAST	C2-C1	0.0141169	0.101461	0.139136	8	0.892782	0.999512	NA	0	0
sp|P21825|SEC62_YEAST	C2-C1	0.00085296	0.0726249	0.0117447	8	0.990917	0.999512	NA	0	0
sp|P21827|RCC1_YEAST	C2-C1	0.108314	0.0946299	1.14461	8	0.28546	0.999512	NA	0	0
sp|P21951|DPOE_YEAST	C2-C1	-0.0117591	0.0476927	-0.246559	8	0.811458	0.999512	NA	0.0104167	0.0104167
sp|P21954|IDHP_YEAST	C2-C1	0.0643333	0.0578891	1.11132	8	0.298711	0.999512	NA	0	0
sp|P21957|OPI1_YEAST	C2-C1	-0.222133	0.229236	-0.969013	8	0.360918	0.999512	NA	0.0555556	0.0555556
sp|P21965|MCK1_YEAST	C2-C1	-0.00992646	0.0712725	-0.139275	8	0.892675	0.999512	NA	0.00925926	0.00925926
sp|P22007|FNTB_YEAST	C2-C1	-0.063964	0.0728693	-0.87779	8	0.405647	0.999512	NA	0	0
sp|P22023|KRE5_YEAST	C2-C1	-0.0116808	0.117083	-0.0997652	8	0.922986	0.999512	NA	0	0
sp|P22082|SNF2_YEAST	C2-C1	-0.125847	0.171344	-0.734468	8	0.483633	0.999512	NA	0	0
sp|P22108|APA2_YEAST	C2-C1	-0.176614	0.0599643	-2.94532	8	0.0185581	0.999512	NA	0	0
sp|P22133|MDHC_YEAST	C2-C1	-0.0102651	0.0732901	-0.140062	8	0.892073	0.999512	NA	0	0
sp|P22134|MAG_YEAST	C2-C1	-0.121311	0.757415	-0.160165	8	0.876722	0.999512	NA	0	0
sp|P22135|ATP12_YEAST	C2-C1	-0.0763084	0.118581	-0.643516	8	0.537895	0.999512	NA	0	0
sp|P22137|CLH_YEAST	C2-C1	-0.0114297	0.041664	-0.274332	8	0.79078	0.999512	NA	0	0
sp|P22138|RPA2_YEAST	C2-C1	0.00621483	0.0455072	0.136568	8	0.894746	0.999512	NA	0	0
sp|P22139|RPAB5_YEAST	C2-C1	0.393452	0.221228	1.77849	8	0.113211	0.999512	NA	0	0
sp|P22141|PSB4_YEAST	C2-C1	0.0381817	0.0536002	0.712342	8	0.4965	0.999512	NA	0	0
sp|P22146|GAS1_YEAST	C2-C1	0.064884	0.102668	0.631981	8	0.545032	0.999512	NA	0	0
sp|P22147|XRN1_YEAST	C2-C1	-0.0239965	0.0354024	-0.67782	8	0.517006	0.999512	NA	0	0
sp|P22202|HSP74_YEAST	C2-C1	-0.0528252	0.0967913	-0.545765	8	0.600111	0.999512	NA	0	0
sp|P22203|VATE_YEAST	C2-C1	-0.0390844	0.0533182	-0.73304	8	0.484457	0.999512	NA	0	0
sp|P22204|DBF2_YEAST	C2-C1	-0.10767	0.100459	-1.07178	8	0.315083	0.999512	NA	0	0
sp|P22209|KIN3_YEAST	C2-C1	0.694928	0.658135	1.05591	8	0.321853	0.999512	NA	0	0
sp|P22211|NPR1_YEAST	C2-C1	-0.473973	0.251171	-1.88705	8	0.0958598	0.999512	NA	0	0
sp|P22213|SLY1_YEAST	C2-C1	0.0168728	0.0630755	0.267502	8	0.79585	0.999512	NA	0	0
sp|P22214|SEC22_YEAST	C2-C1	0.347366	0.183826	1.88964	8	0.0954789	0.999512	NA	0	0
sp|P22215|SLY41_YEAST	C2-C1	0.116755	0.960113	0.121606	8	0.90621	0.999512	NA	0	0
sp|P22216|RAD53_YEAST	C2-C1	0.393474	0.283515	1.38784	8	0.202614	0.999512	NA	0	0
sp|P22217|TRX1_YEAST	C2-C1	-0.0775038	0.105852	-0.732193	8	0.484946	0.999512	NA	0	0
sp|P22219|VPS15_YEAST	C2-C1	-0.143359	0.346671	-0.41353	8	0.690082	0.999512	NA	0.0555556	0.0555556
sp|P22224|SEC15_YEAST	C2-C1	0.404506	0.410908	0.984419	8	0.353742	0.999512	NA	0	0
sp|P22276|RPC2_YEAST	C2-C1	0.0659634	0.0959799	0.687263	8	0.511345	0.999512	NA	0.0185185	0.0185185
sp|P22336|RFA1_YEAST	C2-C1	0.00958713	0.126719	0.0756564	8	0.94155	0.999512	NA	0	0
sp|P22353|RM08_YEAST	C2-C1	0.0983612	0.139996	0.702599	8	0.502234	0.999512	NA	0	0
sp|P22434|PDE1_YEAST	C2-C1	-0.115946	0.118553	-0.978009	8	0.356714	0.999512	NA	0	0
sp|P22438|SYMM_YEAST	C2-C1	-1.1382	1.41529	-0.804219	8	0.444509	0.999512	NA	0	0
sp|P22470|SAN1_YEAST	C2-C1	-0.431251	0.37323	-1.15546	8	0.281244	0.999512	NA	0	0
sp|P22515|UBA1_YEAST	C2-C1	-0.00668977	0.0472276	-0.14165	8	0.890859	0.999512	NA	0	0
sp|P22516|CHL1_YEAST	C2-C1	0.443445	0.477986	0.927738	8	0.380682	0.999512	NA	0	0
sp|P22517|KCC2_YEAST	C2-C1	-0.0116987	0.0891981	-0.131154	8	0.898892	0.999512	NA	0	0
sp|P22543|VPS34_YEAST	C2-C1	0.0643277	0.290402	0.221513	8	0.830243	0.999512	NA	0	0
sp|P22579|SIN3_YEAST	C2-C1	0.00550664	0.0936957	0.0587715	8	0.954576	0.999512	NA	0	0
sp|P22696|ESS1_YEAST	C2-C1	-0.0550403	0.0995678	-0.552792	8	0.59551	0.999512	NA	0	0
sp|P22768|ASSY_YEAST	C2-C1	0.0703874	0.102019	0.689946	8	0.509744	0.999512	NA	0	0
sp|P22803|TRX2_YEAST	C2-C1	0.0109071	0.0880253	0.123909	8	0.904444	0.999512	NA	0	0
sp|P22804|BET1_YEAST	C2-C1	-0.0800941	0.154507	-0.518385	8	0.618218	0.999512	NA	0	0
sp|P22855|MAN1_YEAST	C2-C1	-0.0948524	0.168024	-0.564516	8	0.587878	0.999512	NA	0	0
sp|P22936|APN1_YEAST	C2-C1	-0.0904267	0.0383222	-2.35964	8	0.0459838	0.999512	NA	0.0166667	0.0166667
sp|P22943|HSP12_YEAST	C2-C1	-0.340207	0.120619	-2.82052	8	0.0224758	0.999512	NA	0	0
sp|P23180|AIM17_YEAST	C2-C1	0.0528046	0.0588975	0.896552	8	0.396135	0.999512	NA	0.0238095	0.0238095
sp|P23201|SPA2_YEAST	C2-C1	0.0148362	0.0445126	0.333303	8	0.747473	0.999512	NA	0.0190476	0.0190476
sp|P23202|URE2_YEAST	C2-C1	0.0117154	0.113356	0.10335	8	0.920229	0.999512	NA	0	0
sp|P23248|RS3A2_YEAST	C2-C1	-0.157101	0.172537	-0.910537	8	0.38915	0.999512	NA	0	0
sp|P23250|RPI1_YEAST	C2-C1	-0.0497229	0.412365	-0.12058	8	0.906997	0.999512	NA	0.0833333	0.0833333
sp|P23254|TKT1_YEAST	C2-C1	-0.0380452	0.0882549	-0.431083	8	0.677788	0.999512	NA	0	0
sp|P23255|TAF2_YEAST	C2-C1	-0.0226948	0.131439	-0.172664	8	0.867204	0.999512	NA	0	0
sp|P23287|PP2B1_YEAST	C2-C1	-0.0863612	0.0644057	-1.34089	8	0.21678	0.999512	NA	0	0
sp|P23291|KC11_YEAST	C2-C1	0.00750666	0.0942515	0.079645	8	0.938476	0.999512	NA	0	0
sp|P23292|KC12_YEAST	C2-C1	0.0156438	0.0804429	0.194471	8	0.850655	0.999512	NA	0	0
sp|P23293|BUR1_YEAST	C2-C1	0.115696	0.106822	1.08308	8	0.310336	0.999512	NA	0	0
sp|P23301|IF5A1_YEAST	C2-C1	0.037484	0.106797	0.350984	8	0.734664	0.999512	NA	0	0
sp|P23337|GYS1_YEAST	C2-C1	-0.0913938	0.139495	-0.655176	8	0.530739	0.999512	NA	0	0
sp|P23369|RM25_YEAST	C2-C1	-0.139676	0.42744	-0.326772	8	0.752226	0.999512	NA	0	0
sp|P23394|PRP28_YEAST	C2-C1	0.394018	0.519647	0.758242	8	0.470052	0.999512	NA	0.0555556	0.0555556
sp|P23500|MRS4_YEAST	C2-C1	-0.00273058	1.39917	-0.00195156	8	0.998491	0.999533	NA	0	0
sp|P23503|NAR1_YEAST	C2-C1	0.009929	0.135103	0.0734921	8	0.943219	0.999512	NA	0.0416667	0.0416667
sp|P23542|AATC_YEAST	C2-C1	-0.00536891	0.0857747	-0.0625932	8	0.951626	0.999512	NA	0	0
sp|P23561|STE11_YEAST	C2-C1	-0.537571	0.220139	-2.44196	8	0.0404407	0.999512	NA	0	0
sp|P23585|HXT2_YEAST	C2-C1	-0.151085	0.146035	-1.03458	8	0.331124	0.999512	NA	0	0
sp|P23594|PP2A1_YEAST	C2-C1	-0.0287796	0.892952	-0.0322298	8	0.975078	0.999512	NA	0	0
sp|P23595|PP2A2_YEAST	C2-C1	0.00123849	0.0796787	0.0155435	8	0.987979	0.999512	NA	0	0
sp|P23615|SPT6_YEAST	C2-C1	0.00222858	0.0561776	0.0396704	8	0.969328	0.999512	NA	0	0
sp|P23638|PSA3_YEAST	C2-C1	-0.080714	0.116212	-0.694541	8	0.507008	0.999512	NA	0	0
sp|P23639|PSA2_YEAST	C2-C1	-0.0483602	0.0750901	-0.644029	8	0.537579	0.999512	NA	0	0
sp|P23641|MPCP_YEAST	C2-C1	0.0330139	0.0703845	0.469051	8	0.65155	0.999512	NA	0	0
sp|P23642|VAN1_YEAST	C2-C1	-0.0921589	0.11894	-0.774835	8	0.460723	0.999512	NA	0	0
sp|P23643|VPS3_YEAST	C2-C1	-0.307763	0.0536917	-5.73203	8	0.000437934	0.169881	NA	0	0
sp|P23644|TOM40_YEAST	C2-C1	0.0456174	0.0670178	0.680676	8	0.51529	0.999512	NA	0	0
sp|P23724|PSB6_YEAST	C2-C1	-0.154861	0.146099	-1.05997	8	0.320107	0.999512	NA	0	0
sp|P23776|EXG1_YEAST	C2-C1	-0.0316159	0.0734816	-0.430257	8	0.678365	0.999512	NA	0	0
sp|P23796|RIT1_YEAST	C2-C1	0.236523	0.0945479	2.50162	8	0.0368489	0.999512	NA	0	0
sp|P23797|GPI12_YEAST	C2-C1	-0.910628	0.647254	-1.40691	8	0.197095	0.999512	NA	0	0
sp|P23833|SCO1_YEAST	C2-C1	0.261691	0.0901576	2.9026	8	0.0198127	0.999512	NA	0	0
sp|P23900|FPS1_YEAST	C2-C1	-2.42877	1.81975	-1.33467	8	0.21872	0.999512	NA	0	0
sp|P23968|VATO_YEAST	C2-C1	0.162612	0.22249	0.730875	8	0.485708	0.999512	NA	0	0
sp|P24000|RL24B_YEAST	C2-C1	0.0320184	0.12222	0.261974	8	0.799961	0.999512	NA	0	0
sp|P24004|PEX1_YEAST	C2-C1	-0.157027	0.196906	-0.797473	8	0.448197	0.999512	NA	0	0
sp|P24031|PPA3_YEAST	C2-C1	-0.0104144	0.124594	-0.0835863	8	0.935439	0.999512	NA	0	0
sp|P24276|SSD1_YEAST	C2-C1	0.0638088	0.0491965	1.29702	8	0.230779	0.999512	NA	0	0
sp|P24279|MCM3_YEAST	C2-C1	0.0133477	0.0381865	0.34954	8	0.735707	0.999512	NA	0	0
sp|P24280|SEC14_YEAST	C2-C1	0.0245541	0.0741564	0.331113	8	0.749066	0.999512	NA	0	0
sp|P24309|DBR1_YEAST	C2-C1	-0.271256	0.104502	-2.59569	8	0.0318302	0.999512	NA	0	0
sp|P24384|PRP22_YEAST	C2-C1	-3.05701	2.68147	-1.14005	6	0.297721	0.999512	NA	0	0
sp|P24482|DPB2_YEAST	C2-C1	0.263859	0.267594	0.986039	8	0.352993	0.999512	NA	0	0
sp|P24521|ERG8_YEAST	C2-C1	0.000525187	0.0454092	0.0115656	8	0.991055	0.999512	NA	0	0
sp|P24583|KPC1_YEAST	C2-C1	0.00647077	0.0695442	0.0930454	8	0.928155	0.999512	NA	0	0
sp|P24720|MNE1_YEAST	C2-C1	-1.82989	4.24176	-0.431398	6	0.681248	0.999512	NA	0.333333	0
sp|P24783|DBP2_YEAST	C2-C1	-0.0701648	0.0784907	-0.893925	8	0.397457	0.999512	NA	0	0
sp|P24814|GRR1_YEAST	C2-C1	-0.354119	0.455764	-0.776978	8	0.459527	0.999512	NA	0	0
sp|P25037|UBP1_YEAST	C2-C1	0.0667286	0.14402	0.463329	8	0.655473	0.999512	NA	0	0
sp|P25038|IF2M_YEAST	C2-C1	1.4215	1.04244	1.36363	8	0.209815	0.999512	NA	0	0
sp|P25039|EFGM_YEAST	C2-C1	-0.0784621	0.0766327	-1.02387	8	0.335856	0.999512	NA	0	0
sp|P25040|TSR4_YEAST	C2-C1	-0.0107004	0.0817285	-0.130926	8	0.899066	0.999512	NA	0.0138889	0.0138889
sp|P25043|PSB2_YEAST	C2-C1	0.0164845	0.0753977	0.218634	8	0.832409	0.999512	NA	0	0
sp|P25044|PTP1_YEAST	C2-C1	-2.77032	1.92142	-1.44181	8	0.187333	0.999512	NA	0	0
sp|P25045|LCB1_YEAST	C2-C1	-0.0369109	0.083018	-0.444613	8	0.668382	0.999512	NA	0	0
sp|P25087|ERG6_YEAST	C2-C1	0.0416987	0.0569039	0.732792	8	0.4846	0.999512	NA	0	0
sp|P25270|MRM1_YEAST	C2-C1	0.408216	0.573251	0.712106	8	0.496638	0.999512	NA	0	0
sp|P25293|NAP1_YEAST	C2-C1	0.0448526	0.0434343	1.03265	8	0.331971	0.999512	NA	0	0
sp|P25294|SIS1_YEAST	C2-C1	0.0313639	0.0717693	0.43701	8	0.67366	0.999512	NA	0	0
sp|P25296|CANB_YEAST	C2-C1	-0.0989181	0.172105	-0.574754	8	0.581257	0.999512	NA	0	0
sp|P25297|PHO84_YEAST	C2-C1	-0.0168501	0.0517055	-0.325885	8	0.752872	0.999512	NA	0	0
sp|P25298|RNA14_YEAST	C2-C1	-0.0145061	0.0672905	-0.215574	8	0.834714	0.999512	NA	0	0
sp|P25299|RNA15_YEAST	C2-C1	0.0416841	0.0803601	0.518717	8	0.617997	0.999512	NA	0	0
sp|P25302|SWI4_YEAST	C2-C1	-0.158276	0.265331	-0.596521	8	0.56732	0.999512	NA	0	0
sp|P25303|SCJ1_YEAST	C2-C1	0.00975333	0.124064	0.0786154	8	0.939269	0.999512	NA	0	0
sp|P25332|RBSK_YEAST	C2-C1	-0.047725	0.104956	-0.454714	8	0.6614	0.999512	NA	0	0
sp|P25333|HAL4_YEAST	C2-C1	-0.152531	0.443779	-0.343709	8	0.739924	0.999512	NA	0	0
sp|P25334|CYPR_YEAST	C2-C1	-0.724898	0.898664	-0.806639	8	0.443192	0.999512	NA	0	0
sp|P25335|ALLC_YEAST	C2-C1	1.41521	0.610495	2.31814	8	0.0490617	0.999512	NA	0	0
sp|P25336|MSH3_YEAST	C2-C1	-0.305943	1.13503	-0.269545	8	0.794332	0.999512	NA	0.0555556	0.0555556
sp|P25337|BUD31_YEAST	C2-C1	-0.0134551	0.31404	-0.042845	8	0.966875	0.999512	NA	0	0
sp|P25339|PUF4_YEAST	C2-C1	0.0309208	0.0560456	0.551708	8	0.596219	0.999512	NA	0	0
sp|P25340|ERG4_YEAST	C2-C1	0.0596471	0.0539993	1.10459	8	0.301449	0.999512	NA	0	0
sp|P25342|CDC10_YEAST	C2-C1	-0.0432217	0.115756	-0.373388	8	0.71856	0.999512	NA	0	0
sp|P25343|RV161_YEAST	C2-C1	-0.0691419	0.109731	-0.630102	8	0.5462	0.999512	NA	0	0
sp|P25344|STE50_YEAST	C2-C1	-0.244616	0.250484	-0.976572	8	0.357384	0.999512	NA	0	0
sp|P25348|RM32_YEAST	C2-C1	0.0787591	0.191152	0.412023	8	0.691142	0.999512	NA	0	0
sp|P25349|YCP4_YEAST	C2-C1	-0.0746963	0.0736854	-1.01372	8	0.340391	0.999512	NA	0	0
sp|P25355|CTR86_YEAST	C2-C1	-0.039568	0.120613	-0.328059	8	0.751289	0.999512	NA	0	0
sp|P25356|BPH1_YEAST	C2-C1	0.599986	1.77387	0.338236	7	0.745103	0.999512	NA	0	0
sp|P25358|ELO2_YEAST	C2-C1	0.171051	0.15284	1.11915	8	0.29555	0.999512	NA	0	0
sp|P25359|RRP43_YEAST	C2-C1	0.140063	0.140073	0.999928	8	0.346626	0.999512	NA	0	0
sp|P25361|YCT3_YEAST	C2-C1	-0.199512	0.146786	-1.3592	8	0.211157	0.999512	NA	0	0
sp|P25365|SED4_YEAST	C2-C1	-0.685018	0.506677	-1.35198	8	0.213359	0.999512	NA	0	0
sp|P25366|OCA4_YEAST	C2-C1	-0.0357289	0.0993858	-0.359497	8	0.728528	0.999512	NA	0	0
sp|P25367|RNQ1_YEAST	C2-C1	-0.153265	0.0607834	-2.52149	8	0.0357256	0.999512	NA	0	0
sp|P25368|RRP7_YEAST	C2-C1	-0.108718	0.0969084	-1.12186	8	0.294463	0.999512	NA	0	0
sp|P25369|LSB5_YEAST	C2-C1	-0.0844012	0.0609428	-1.38493	8	0.20347	0.999512	NA	0	0
sp|P25370|GFD2_YEAST	C2-C1	5.00704	2.91648	1.71681	7	0.129718	0.999512	NA	0.166667	0
sp|P25371|ADP1_YEAST	C2-C1	-0.115916	0.224678	-0.51592	8	0.619862	0.999512	NA	0.0238095	0.0238095
sp|P25372|TRX3_YEAST	C2-C1	-0.0491944	0.09027	-0.54497	8	0.600632	0.999512	NA	0	0
sp|P25373|GLRX1_YEAST	C2-C1	-0.0528019	0.0853526	-0.618633	8	0.55336	0.999512	NA	0	0
sp|P25374|NFS1_YEAST	C2-C1	-0.171998	0.133222	-1.29106	8	0.232737	0.999512	NA	0	0
sp|P25375|PRTD_YEAST	C2-C1	-0.0122135	0.0506175	-0.24129	8	0.8154	0.999512	NA	0	0
sp|P25376|AGP1_YEAST	C2-C1	0.350632	0.169686	2.06635	8	0.0726395	0.999512	NA	0	0
sp|P25378|RHEB_YEAST	C2-C1	-0.0533226	0.145749	-0.365852	8	0.723961	0.999512	NA	0.0833333	0.0833333
sp|P25379|STDH_YEAST	C2-C1	0.0241964	0.0992349	0.24383	8	0.813499	0.999512	NA	0.0104167	0.0104167
sp|P25382|NLE1_YEAST	C2-C1	0.18308	0.147658	1.2399	8	0.250148	0.999512	NA	0	0
sp|P25385|BOS1_YEAST	C2-C1	-0.00546768	0.0829976	-0.0658776	8	0.949092	0.999512	NA	0	0
sp|P25386|USO1_YEAST	C2-C1	-0.0381574	0.0599124	-0.636887	8	0.54199	0.999512	NA	0.0384615	0.0384615
sp|P25389|KCC4_YEAST	C2-C1	0.0681382	0.111748	0.609747	8	0.558946	0.999512	NA	0	0
sp|P25441|RPC4_YEAST	C2-C1	-0.1446	0.10564	-1.3688	8	0.208259	0.999512	NA	0	0
sp|P25443|RS2_YEAST	C2-C1	0.0391706	0.0872847	0.448769	8	0.665505	0.999512	NA	0	0
sp|P25451|PSB3_YEAST	C2-C1	0.0333123	0.0453426	0.734681	8	0.48351	0.999512	NA	0	0
sp|P25454|RAD51_YEAST	C2-C1	-0.310735	0.134457	-2.31103	8	0.0496094	0.999512	NA	0	0
sp|P25491|MAS5_YEAST	C2-C1	-0.00119625	0.098541	-0.0121396	8	0.990612	0.999512	NA	0	0
sp|P25554|SGF29_YEAST	C2-C1	-0.0714257	0.0984494	-0.725506	8	0.488818	0.999512	NA	0	0
sp|P25555|GBP2_YEAST	C2-C1	-0.0989583	0.0545285	-1.8148	8	0.107101	0.999512	NA	0	0
sp|P25558|BUD3_YEAST	C2-C1	0.0328182	0.0628875	0.521856	8	0.615907	0.999512	NA	0	0
sp|P25559|DCC1_YEAST	C2-C1	0.293497	1.35351	0.216843	8	0.833759	0.999512	NA	0.0833333	0.0833333
sp|P25560|RER1_YEAST	C2-C1	0.163328	0.196443	0.831429	8	0.429847	0.999512	NA	0	0
sp|P25562|YCC2_YEAST	C2-C1	-0.77755	1.9939	-0.389965	7	0.708156	0.999512	NA	0	0
sp|P25566|MXR2_YEAST	C2-C1	0.065236	0.0901832	0.723372	8	0.490058	0.999512	NA	0	0
sp|P25567|SRO9_YEAST	C2-C1	0.0562998	0.0971222	0.57968	8	0.578086	0.999512	NA	0	0
sp|P25569|GID7_YEAST	C2-C1	-0.196203	0.613615	-0.319749	8	0.757349	0.999512	NA	0	0
sp|P25573|MGR1_YEAST	C2-C1	0.141108	0.119271	1.18308	8	0.27074	0.999512	NA	0	0
sp|P25574|EMC1_YEAST	C2-C1	-0.0312754	0.0497747	-0.62834	8	0.547297	0.999512	NA	0	0
sp|P25576|POF1_YEAST	C2-C1	-0.0481003	0.111152	-0.432743	8	0.676631	0.999512	NA	0	0
sp|P25579|LRE1_YEAST	C2-C1	0.237799	0.415441	0.5724	8	0.582775	0.999512	NA	0	0
sp|P25580|PBN1_YEAST	C2-C1	0.141449	0.314876	0.449221	8	0.665193	0.999512	NA	0	0
sp|P25582|SPB1_YEAST	C2-C1	-0.0807476	0.0901045	-0.896155	8	0.396334	0.999512	NA	0	0
sp|P25586|KRR1_YEAST	C2-C1	-0.00675638	0.10927	-0.0618318	8	0.952214	0.999512	NA	0	0
sp|P25588|MRC1_YEAST	C2-C1	-0.310068	0.207871	-1.49164	8	0.174136	0.999512	NA	0	0
sp|P25604|STP22_YEAST	C2-C1	-0.125222	0.104441	-1.19897	8	0.264846	0.999512	NA	0	0
sp|P25605|ILV6_YEAST	C2-C1	0.130067	0.085767	1.51651	8	0.167861	0.999512	NA	0.025641	0.025641
sp|P25612|AAD3_YEAST	C2-C1	-0.12081	1.49783	-0.0806571	8	0.937696	0.999512	NA	0	0
sp|P25616|YCQ5_YEAST	C2-C1	0.0927844	0.167671	0.553371	8	0.595132	0.999512	NA	0	0
sp|P25617|YCQ6_YEAST	C2-C1	0.00483325	0.108215	0.0446633	8	0.96547	0.999512	NA	0	0
sp|P25618|CWH43_YEAST	C2-C1	-0.019427	0.178188	-0.109025	8	0.915868	0.999512	NA	0	0
sp|P25619|HSP30_YEAST	C2-C1	-0.053632	0.913424	-0.0587153	8	0.954619	0.999512	NA	0	0
sp|P25623|SYP1_YEAST	C2-C1	-0.0743537	0.053619	-1.38671	8	0.202947	0.999512	NA	0	0
sp|P25626|IMG1_YEAST	C2-C1	0.0229802	0.0933399	0.246199	8	0.811727	0.999512	NA	0	0
sp|P25627|BUD23_YEAST	C2-C1	0.241517	0.252862	0.955133	8	0.367477	0.999512	NA	0	0
sp|P25628|ARE1_YEAST	C2-C1	-0.0769662	0.219231	-0.351073	8	0.7346	0.999512	NA	0	0
sp|P25631|YCU1_YEAST	C2-C1	0.00440835	0.141373	0.0311824	8	0.975888	0.999512	NA	0	0
sp|P25632|RSC6_YEAST	C2-C1	-0.0960424	0.173497	-0.553568	8	0.595003	0.999512	NA	0	0
sp|P25635|PWP2_YEAST	C2-C1	0.0669455	0.0531698	1.25909	8	0.243493	0.999512	NA	0	0
sp|P25638|TAH1_YEAST	C2-C1	0.00433562	0.153354	0.028272	8	0.978138	0.999512	NA	0	0
sp|P25639|YCV1_YEAST	C2-C1	-0.245506	0.416755	-0.58909	8	0.572056	0.999512	NA	0	0
sp|P25641|ATG15_YEAST	C2-C1	-0.17035	0.597628	-0.285043	8	0.782851	0.999512	NA	0	0
sp|P25642|IMG2_YEAST	C2-C1	-0.0844477	0.143013	-0.590491	8	0.571161	0.999512	NA	0	0
sp|P25644|PAT1_YEAST	C2-C1	0.00189257	0.112122	0.0168796	8	0.986946	0.999512	NA	0.0111111	0.0111111
sp|P25651|CSM1_YEAST	C2-C1	-0.144136	0.120434	-1.19681	8	0.265642	0.999512	NA	0	0
sp|P25654|YCY0_YEAST	C2-C1	-0.0124555	0.0457293	-0.272375	8	0.792232	0.999512	NA	0	0
sp|P25655|NOT1_YEAST	C2-C1	0.0225689	0.0483421	0.466859	8	0.653051	0.999512	NA	0	0
sp|P25656|CDC50_YEAST	C2-C1	0.42556	0.937383	0.453987	8	0.661901	0.999512	NA	0	0
sp|P25659|YCW6_YEAST	C2-C1	0.00960089	0.141096	0.068045	8	0.94742	0.999512	NA	0	0
sp|P25694|CDC48_YEAST	C2-C1	-0.00994017	0.0599563	-0.16579	8	0.872435	0.999512	NA	0	0
sp|P25719|CYPC_YEAST	C2-C1	-0.127603	0.191841	-0.66515	8	0.524663	0.999512	NA	0	0
sp|P25808|SPB4_YEAST	C2-C1	-0.0559891	0.0856797	-0.653471	8	0.531782	0.999512	NA	0	0
sp|P25846|MSH1_YEAST	C2-C1	-2.14096	1.80072	-1.18894	8	0.268553	0.999512	NA	0	0
sp|P25847|MSH2_YEAST	C2-C1	0.00827459	0.0798593	0.103615	8	0.920026	0.999512	NA	0	0
sp|P26263|PDC6_YEAST	C2-C1	0.141528	0.250324	0.565379	8	0.587317	0.999512	NA	0	0
sp|P26321|RL5_YEAST	C2-C1	0.0419293	0.140889	0.297606	8	0.773586	0.999512	NA	0	0
sp|P26364|KAD3_YEAST	C2-C1	-0.0170127	0.0587643	-0.289508	8	0.779554	0.999512	NA	0	0
sp|P26449|BUB3_YEAST	C2-C1	0.244212	0.542612	0.450067	8	0.664608	0.999512	NA	0	0
sp|P26570|PPZ1_YEAST	C2-C1	1.3512	0.894308	1.51089	8	0.169262	0.999512	NA	0	0
sp|P26637|SYLC_YEAST	C2-C1	-0.0460726	0.0288331	-1.59791	8	0.14873	0.999512	NA	0	0
sp|P26754|RFA2_YEAST	C2-C1	-0.0533475	0.098112	-0.54374	8	0.60144	0.999512	NA	0	0
sp|P26755|RFA3_YEAST	C2-C1	-0.0453978	0.084367	-0.538099	8	0.605151	0.999512	NA	0	0
sp|P26783|RS5_YEAST	C2-C1	-0.0464047	0.0740239	-0.626889	8	0.548201	0.999512	NA	0	0
sp|P26784|RL16A_YEAST	C2-C1	-0.237083	0.19166	-1.237	8	0.251165	0.999512	NA	0	0
sp|P26785|RL16B_YEAST	C2-C1	-0.0958747	0.199966	-0.479455	8	0.644447	0.999512	NA	0	0
sp|P26786|RS7A_YEAST	C2-C1	-0.0151688	0.0765005	-0.198283	8	0.847769	0.999512	NA	0	0
sp|P26793|FEN1_YEAST	C2-C1	0.089095	0.177152	0.502931	8	0.628564	0.999512	NA	0.0277778	0.0277778
sp|P27344|DPB3_YEAST	C2-C1	0.0950741	0.443511	0.214367	8	0.835624	0.999512	NA	0	0
sp|P27351|AP2B_YEAST	C2-C1	-0.127787	0.123766	-1.03249	8	0.332045	0.999512	NA	0	0
sp|P27466|KCC1_YEAST	C2-C1	0.229895	0.215532	1.06664	8	0.317263	0.999512	NA	0	0
sp|P27472|GYS2_YEAST	C2-C1	0.0267863	0.0563415	0.475428	8	0.647192	0.999512	NA	0	0
sp|P27476|NSR1_YEAST	C2-C1	-0.012613	0.126315	-0.0998538	8	0.922917	0.999512	NA	0	0
sp|P27514|PHO91_YEAST	C2-C1	-0.0563353	0.103957	-0.541912	8	0.602642	0.999512	NA	0	0
sp|P27515|URK1_YEAST	C2-C1	0.23961	0.215461	1.11208	8	0.298403	0.999512	NA	0	0
sp|P27614|CBPS_YEAST	C2-C1	-0.00202389	0.0910677	-0.022224	8	0.982814	0.999512	NA	0	0
sp|P27616|PUR7_YEAST	C2-C1	-0.0321919	0.0408039	-0.788942	8	0.45289	0.999512	NA	0	0
sp|P27637|BUD14_YEAST	C2-C1	0.0548031	0.0587572	0.932706	8	0.378262	0.999512	NA	0	0
sp|P27680|COQ3_YEAST	C2-C1	0.802071	0.775484	1.03428	8	0.331254	0.999512	NA	0	0
sp|P27692|SPT5_YEAST	C2-C1	-0.0162973	0.113846	-0.143152	8	0.88971	0.999512	NA	0	0
sp|P27697|COQ8_YEAST	C2-C1	-1.28769	0.517949	-2.48613	8	0.0377494	0.999512	NA	0	0
sp|P27705|MIG1_YEAST	C2-C1	-0.165631	0.214027	-0.773877	8	0.461258	0.999512	NA	0	0
sp|P27801|PEP3_YEAST	C2-C1	0.255514	0.204869	1.24721	8	0.247595	0.999512	NA	0	0
sp|P27809|KRE2_YEAST	C2-C1	-0.0237034	0.0764718	-0.309963	8	0.76451	0.999512	NA	0	0
sp|P27810|KTR1_YEAST	C2-C1	0.0650855	0.116529	0.558536	8	0.591764	0.999512	NA	0	0
sp|P27825|CALX_YEAST	C2-C1	-1.28267	1.12058	-1.14465	8	0.285444	0.999512	NA	0	0
sp|P27882|ERV1_YEAST	C2-C1	0.338685	0.276341	1.22561	8	0.255201	0.999512	NA	0	0
sp|P27929|NAM9_YEAST	C2-C1	-0.0233998	0.0489218	-0.47831	8	0.645227	0.999512	NA	0	0
sp|P27999|RPB9_YEAST	C2-C1	-0.0229164	0.195613	-0.117151	8	0.909628	0.999512	NA	0	0
sp|P28000|RPAC2_YEAST	C2-C1	0.0662083	0.106849	0.619643	8	0.552728	0.999512	NA	0	0
sp|P28004|PRP45_YEAST	C2-C1	-0.703802	0.621535	-1.13236	8	0.290279	0.999512	NA	0	0
sp|P28007|GAR1_YEAST	C2-C1	0.0498909	0.0855056	0.583481	8	0.575646	0.999512	NA	0	0
sp|P28239|IPYR2_YEAST	C2-C1	0.0409099	0.0797304	0.513103	8	0.621744	0.999512	NA	0	0
sp|P28240|ACEA_YEAST	C2-C1	0.650559	0.930891	0.698857	8	0.504448	0.999512	NA	0	0
sp|P28241|IDH2_YEAST	C2-C1	0.0444204	0.0423573	1.04871	8	0.324959	0.999512	NA	0	0
sp|P28263|UBC8_YEAST	C2-C1	-0.981061	1.0803	-0.908134	8	0.390344	0.999512	NA	0	0
sp|P28272|PYRD_YEAST	C2-C1	0.294864	0.0811358	3.6342	8	0.00664449	0.999512	NA	0	0
sp|P28273|OPLA_YEAST	C2-C1	-0.0139626	0.0823537	-0.169545	8	0.869577	0.999512	NA	0	0
sp|P28274|URA7_YEAST	C2-C1	-0.0600544	0.0521317	-1.15198	8	0.282592	0.999512	NA	0.00694444	0.00694444
sp|P28319|CWP1_YEAST	C2-C1	-0.0949015	0.126818	-0.748331	8	0.475683	0.999512	NA	0	0
sp|P28320|CWC16_YEAST	C2-C1	-0.316044	1.87929	-0.168172	7	0.871204	0.999512	NA	0	0
sp|P28321|MGLL_YEAST	C2-C1	-0.116607	0.0845004	-1.37996	8	0.204936	0.999512	NA	0	0
sp|P28495|CAPZA_YEAST	C2-C1	0.104792	0.0584259	1.79359	8	0.110631	0.999512	NA	0	0
sp|P28496|LAC1_YEAST	C2-C1	-0.0522613	0.108807	-0.48031	8	0.643866	0.999512	NA	0	0
sp|P28625|YIM1_YEAST	C2-C1	-0.0192758	0.0299145	-0.644364	8	0.537372	0.999512	NA	0	0
sp|P28707|SBA1_YEAST	C2-C1	-0.217892	0.143845	-1.51477	8	0.168296	0.999512	NA	0	0
sp|P28708|PRR1_YEAST	C2-C1	0.838559	0.219216	3.82526	8	0.00505185	0.95101	NA	0	0
sp|P28737|MSP1_YEAST	C2-C1	0.124797	0.250993	0.497215	8	0.632413	0.999512	NA	0	0
sp|P28743|KIP2_YEAST	C2-C1	-0.21128	0.943857	-0.223848	8	0.828486	0.999512	NA	0	0
sp|P28777|AROC_YEAST	C2-C1	-0.0536485	0.0302826	-1.77159	8	0.114408	0.999512	NA	0	0
sp|P28778|RT06_YEAST	C2-C1	0.0934174	0.561754	0.166296	8	0.87205	0.999512	NA	0	0
sp|P28789|HEM3_YEAST	C2-C1	-0.0916358	0.0700503	-1.30814	8	0.227158	0.999512	NA	0	0
sp|P28791|SEC20_YEAST	C2-C1	1.68689	0.296688	5.68573	8	0.000461925	0.169881	NA	0	0
sp|P28795|PEX3_YEAST	C2-C1	-0.048867	0.188958	-0.258613	8	0.802463	0.999512	NA	0	0
sp|P28817|HIBCH_YEAST	C2-C1	-0.0993207	0.206728	-0.480442	8	0.643776	0.999512	NA	0.0151515	0.0151515
sp|P28834|IDH1_YEAST	C2-C1	0.0106147	0.0660948	0.160598	8	0.876391	0.999512	NA	0	0
sp|P29029|CHIT_YEAST	C2-C1	-0.319286	0.236891	-1.34782	8	0.214638	0.999512	NA	0	0
sp|P29055|TF2B_YEAST	C2-C1	-0.0697049	0.0963742	-0.723273	8	0.490116	0.999512	NA	0	0
sp|P29056|TF3B_YEAST	C2-C1	-0.513691	0.494386	-1.03905	8	0.329164	0.999512	NA	0	0
sp|P29295|HRR25_YEAST	C2-C1	-0.0834974	0.0687572	-1.21438	8	0.25923	0.999512	NA	0	0
sp|P29311|BMH1_YEAST	C2-C1	0.0292407	0.116672	0.250623	8	0.808422	0.999512	NA	0	0
sp|P29366|BEM1_YEAST	C2-C1	0.00777386	0.125016	0.0621829	8	0.951943	0.999512	NA	0	0
sp|P29453|RL8B_YEAST	C2-C1	0.00112293	0.10012	0.0112158	8	0.991326	0.999512	NA	0	0
sp|P29465|CHS3_YEAST	C2-C1	-0.122468	0.153352	-0.798609	8	0.447574	0.999512	NA	0	0
sp|P29468|PAP_YEAST	C2-C1	-0.0651886	0.0537267	-1.21334	8	0.259607	0.999512	NA	0	0
sp|P29469|MCM2_YEAST	C2-C1	-0.00176959	0.0832997	-0.0212437	8	0.983572	0.999512	NA	0	0
sp|P29478|SEC65_YEAST	C2-C1	-0.0891321	0.0862593	-1.0333	8	0.331685	0.999512	NA	0	0
sp|P29496|MCM5_YEAST	C2-C1	0.024719	0.0606365	0.407659	8	0.694215	0.999512	NA	0	0
sp|P29509|TRXB1_YEAST	C2-C1	0.0775153	0.0715631	1.08317	8	0.310295	0.999512	NA	0	0
sp|P29539|RIF1_YEAST	C2-C1	0.175867	1.19968	0.146595	8	0.887078	0.999512	NA	0	0
sp|P29547|EF1G1_YEAST	C2-C1	0.0735749	0.0348745	2.10971	8	0.0679044	0.999512	NA	0	0
sp|P29703|FNTA_YEAST	C2-C1	-0.0889145	0.153581	-0.578942	8	0.57856	0.999512	NA	0	0
sp|P29704|FDFT_YEAST	C2-C1	0.0441161	0.0725961	0.607693	8	0.560242	0.999512	NA	0	0
sp|P29952|MPI_YEAST	C2-C1	0.077286	0.0673332	1.14781	8	0.284209	0.999512	NA	0	0
sp|P30619|SEC1_YEAST	C2-C1	0.0513488	0.118874	0.431959	8	0.677177	0.999512	NA	0	0
sp|P30624|LCF1_YEAST	C2-C1	-0.057005	0.0370853	-1.53713	8	0.162816	0.999512	NA	0	0
sp|P30656|PSB5_YEAST	C2-C1	0.108147	0.141929	0.761978	8	0.46794	0.999512	NA	0	0
sp|P30657|PSB7_YEAST	C2-C1	0.0227702	0.112677	0.202084	8	0.844895	0.999512	NA	0	0
sp|P30665|MCM4_YEAST	C2-C1	-0.192049	0.169853	-1.13068	8	0.290946	0.999512	NA	0.00833333	0.00833333
sp|P30771|NAM7_YEAST	C2-C1	-0.0211785	0.0576887	-0.367117	8	0.723053	0.999512	NA	0	0
sp|P30822|XPO1_YEAST	C2-C1	-0.01235	0.059926	-0.206087	8	0.841871	0.999512	NA	0	0
sp|P30902|ATP7_YEAST	C2-C1	0.0648531	0.204738	0.316762	8	0.759532	0.999512	NA	0	0
sp|P31115|PUS3_YEAST	C2-C1	0.806074	0.337024	2.39174	8	0.0437371	0.999512	NA	0.0416667	0.0416667
sp|P31116|DHOM_YEAST	C2-C1	0.0589517	0.068209	0.86428	8	0.412597	0.999512	NA	0	0
sp|P31334|RM09_YEAST	C2-C1	0.202061	0.300318	0.672823	8	0.520017	0.999512	NA	0	0
sp|P31373|CYS3_YEAST	C2-C1	0.0271071	0.0713011	0.380178	8	0.713708	0.999512	NA	0	0
sp|P31374|PSK1_YEAST	C2-C1	-0.0961084	0.112144	-0.857007	8	0.416373	0.999512	NA	0	0
sp|P31376|SWC3_YEAST	C2-C1	-0.130481	0.208859	-0.624733	8	0.549545	0.999512	NA	0	0
sp|P31377|STX8_YEAST	C2-C1	-0.0988165	0.158141	-0.624863	8	0.549464	0.999512	NA	0	0
sp|P31378|NTH1_YEAST	C2-C1	3.59271	1.32766	2.70606	8	0.0268212	0.999512	NA	0	0
sp|P31380|FUN30_YEAST	C2-C1	-0.0516854	0.104367	-0.495228	8	0.633753	0.999512	NA	0	0
sp|P31381|FUN26_YEAST	C2-C1	4.42159	1.88823	2.34166	6	0.0577129	0.999512	NA	0	0
sp|P31382|PMT2_YEAST	C2-C1	-0.0415262	0.0821103	-0.505737	8	0.626679	0.999512	NA	0	0
sp|P31383|2AAA_YEAST	C2-C1	-0.0760527	0.061175	-1.2432	8	0.248992	0.999512	NA	0	0
sp|P31384|CCR4_YEAST	C2-C1	-0.0011819	0.0592452	-0.0199493	8	0.984572	0.999512	NA	0.0104167	0.0104167
sp|P31385|DEP1_YEAST	C2-C1	0.360791	0.141308	2.55322	8	0.0340038	0.999512	NA	0	0
sp|P31412|VATC_YEAST	C2-C1	-0.0866165	0.0949368	-0.91236	8	0.388246	0.999512	NA	0.00833333	0.00833333
sp|P31539|HS104_YEAST	C2-C1	-0.0570543	0.0281907	-2.02387	8	0.0775915	0.999512	NA	0	0
sp|P31688|TPS2_YEAST	C2-C1	-0.0105552	0.0804917	-0.131134	8	0.898907	0.999512	NA	0	0
sp|P31755|OCH1_YEAST	C2-C1	-0.052132	0.100601	-0.518205	8	0.618339	0.999512	NA	0	0
sp|P31787|ACBP_YEAST	C2-C1	0.179798	0.089643	2.00571	8	0.0798065	0.999512	NA	0	0
sp|P32047|MLF3_YEAST	C2-C1	-0.0947171	0.231647	-0.408886	8	0.693351	0.999512	NA	0	0
sp|P32048|SYKM_YEAST	C2-C1	-0.270398	0.274411	-0.985375	8	0.3533	0.999512	NA	0	0
sp|P32074|COPG_YEAST	C2-C1	0.0113666	0.059407	0.191335	8	0.85303	0.999512	NA	0.00520833	0.00520833
sp|P32178|CHMU_YEAST	C2-C1	0.0396205	0.218246	0.181541	8	0.860458	0.999512	NA	0	0
sp|P32179|MET22_YEAST	C2-C1	0.0332846	0.0445052	0.747881	8	0.47594	0.999512	NA	0	0
sp|P32190|GLPK_YEAST	C2-C1	0.313751	1.30369	0.240663	8	0.815869	0.999512	NA	0.0555556	0.0555556
sp|P32191|GPDM_YEAST	C2-C1	0.0280454	0.0756664	0.370645	8	0.720524	0.999512	NA	0	0
sp|P32259|MED16_YEAST	C2-C1	0.303442	0.172017	1.76402	8	0.115735	0.999512	NA	0	0
sp|P32263|P5CR_YEAST	C2-C1	0.0909909	0.0543641	1.67373	8	0.132719	0.999512	NA	0	0
sp|P32264|PROB_YEAST	C2-C1	-0.07801	0.0222267	-3.50974	8	0.00796457	0.999512	NA	0	0
sp|P32266|MGM1_YEAST	C2-C1	-0.0943455	0.069394	-1.35956	8	0.211047	0.999512	NA	0	0
sp|P32288|GLNA_YEAST	C2-C1	-0.282471	0.215645	-1.30989	8	0.226594	0.999512	NA	0.0357143	0.0238095
sp|P32316|ACH1_YEAST	C2-C1	-0.0184572	0.169706	-0.10876	8	0.916071	0.999512	NA	0	0
sp|P32317|AFG1_YEAST	C2-C1	0.0169326	0.309921	0.0546353	8	0.957769	0.999512	NA	0.0555556	0.0555556
sp|P32319|VPS10_YEAST	C2-C1	0.0217938	0.0603722	0.36099	8	0.727454	0.999512	NA	0	0
sp|P32324|EF2_YEAST	C2-C1	0.0566477	0.0406146	1.39476	8	0.200596	0.999512	NA	0	0
sp|P32325|DBF4_YEAST	C2-C1	-0.566668	0.577713	-0.980882	8	0.355379	0.999512	NA	0	0
sp|P32327|PYC2_YEAST	C2-C1	-0.150603	0.143135	-1.05218	8	0.323458	0.999512	NA	0	0
sp|P32329|YPS1_YEAST	C2-C1	-0.118229	0.0647252	-1.82663	8	0.105179	0.999512	NA	0	0
sp|P32330|DGR2_YEAST	C2-C1	2.52852	0.981324	2.57664	8	0.0327872	0.999512	NA	0	0
sp|P32331|YMC1_YEAST	C2-C1	-0.23204	0.651324	-0.356258	8	0.73086	0.999512	NA	0	0
sp|P32332|OAC1_YEAST	C2-C1	0.0630166	0.0637611	0.988324	8	0.35194	0.999512	NA	0	0
sp|P32333|MOT1_YEAST	C2-C1	-0.0657919	0.0899274	-0.731611	8	0.485282	0.999512	NA	0	0
sp|P32335|MSS51_YEAST	C2-C1	0.10236	0.136707	0.748752	8	0.475442	0.999512	NA	0	0
sp|P32336|NUD1_YEAST	C2-C1	-0.211812	0.379126	-0.558687	8	0.591666	0.999512	NA	0	0
sp|P32337|IMB3_YEAST	C2-C1	0.0368069	0.0623825	0.590019	8	0.571462	0.999512	NA	0.00724638	0.00724638
sp|P32338|RME1_YEAST	C2-C1	0.0140394	0.358326	0.0391805	8	0.969707	0.999512	NA	0	0
sp|P32340|NDI1_YEAST	C2-C1	-0.0717823	0.0604266	-1.18793	8	0.268931	0.999512	NA	0	0
sp|P32341|VPH2_YEAST	C2-C1	0.088944	0.496961	0.178976	8	0.862406	0.999512	NA	0	0
sp|P32342|SRP21_YEAST	C2-C1	-0.0678804	0.254614	-0.266601	8	0.796519	0.999512	NA	0	0
sp|P32345|PP4C_YEAST	C2-C1	0.840025	0.500837	1.67724	8	0.132017	0.999512	NA	0	0
sp|P32347|DCUP_YEAST	C2-C1	-0.166153	0.161216	-1.03062	8	0.332866	0.999512	NA	0.0333333	0.0333333
sp|P32349|RPC3_YEAST	C2-C1	0.00903817	0.067559	0.133782	8	0.896879	0.999512	NA	0.0104167	0.0104167
sp|P32351|IMPX_YEAST	C2-C1	0.0344459	0.0916802	0.375718	8	0.716894	0.999512	NA	0	0
sp|P32352|ERG2_YEAST	C2-C1	-0.125519	0.104087	-1.2059	8	0.262309	0.999512	NA	0	0
sp|P32353|ERG3_YEAST	C2-C1	-0.0214284	0.0733041	-0.292322	8	0.777479	0.999512	NA	0	0
sp|P32354|MCM10_YEAST	C2-C1	0.0216059	0.106135	0.20357	7	0.844481	0.999512	NA	0	0
sp|P32356|TREA_YEAST	C2-C1	0.0471143	0.0604259	0.779704	8	0.458009	0.999512	NA	0	0
sp|P32361|IRE1_YEAST	C2-C1	0.646995	0.612972	1.0555	8	0.322025	0.999512	NA	0	0
sp|P32363|GPI3_YEAST	C2-C1	0.172606	0.500146	0.345111	8	0.738909	0.999512	NA	0	0
sp|P32364|SMY1_YEAST	C2-C1	-0.307621	0.157466	-1.95357	8	0.0865135	0.999512	NA	0	0
sp|P32366|VA0D_YEAST	C2-C1	0.0763324	0.137214	0.556302	8	0.593219	0.999512	NA	0	0
sp|P32367|TFC1_YEAST	C2-C1	-0.236762	0.206518	-1.14644	8	0.284743	0.999512	NA	0	0
sp|P32368|SAC1_YEAST	C2-C1	-0.0312732	0.0732631	-0.426862	8	0.680736	0.999512	NA	0	0
sp|P32377|MVD1_YEAST	C2-C1	0.0221679	0.0608318	0.364413	8	0.724994	0.999512	NA	0	0
sp|P32378|COQ2_YEAST	C2-C1	-0.0399556	0.128965	-0.309817	8	0.764617	0.999512	NA	0	0
sp|P32379|PSA5_YEAST	C2-C1	0.0469953	0.139864	0.336008	8	0.745508	0.999512	NA	0	0
sp|P32380|SP110_YEAST	C2-C1	-0.00212242	0.118308	-0.0179399	8	0.986126	0.999512	NA	0	0
sp|P32381|ARP2_YEAST	C2-C1	-0.0181182	0.0528384	-0.342898	8	0.740512	0.999512	NA	0	0
sp|P32383|PLC1_YEAST	C2-C1	3.09771	1.46193	2.11892	8	0.0669376	0.999512	NA	0	0
sp|P32386|YBT1_YEAST	C2-C1	-0.0119273	0.0505328	-0.236031	8	0.819339	0.999512	NA	0.00641026	0.00641026
sp|P32387|RM41_YEAST	C2-C1	0.17258	0.518697	0.332717	8	0.747899	0.999512	NA	0	0
sp|P32388|RM49_YEAST	C2-C1	0.267141	0.137173	1.94747	8	0.0873335	0.999512	NA	0	0
sp|P32419|MDHP_YEAST	C2-C1	0.0514215	0.0534125	0.962725	8	0.363879	0.999512	NA	0	0
sp|P32432|SFP1_YEAST	C2-C1	0.399578	0.115157	3.46984	8	0.00844468	0.999512	NA	0	0
sp|P32445|RIM1_YEAST	C2-C1	-0.164161	0.239618	-0.685095	8	0.512642	0.999512	NA	0.0333333	0.0333333
sp|P32447|ASF1_YEAST	C2-C1	-0.199687	0.144154	-1.38523	8	0.20338	0.999512	NA	0	0
sp|P32449|AROG_YEAST	C2-C1	0.0698109	0.0860212	0.811554	8	0.440524	0.999512	NA	0	0
sp|P32451|BIOB_YEAST	C2-C1	0.397171	0.145287	2.73371	8	0.0256981	0.999512	NA	0	0
sp|P32452|PHA2_YEAST	C2-C1	-0.0300045	0.197279	-0.152091	8	0.882881	0.999512	NA	0	0
sp|P32453|ATP11_YEAST	C2-C1	-0.0155546	0.0646142	-0.24073	8	0.815819	0.999512	NA	0	0
sp|P32454|APE2_YEAST	C2-C1	0.0142112	0.0516221	0.275293	8	0.790068	0.999512	NA	0	0
sp|P32457|CDC3_YEAST	C2-C1	0.0288187	0.049649	0.580448	8	0.577592	0.999512	NA	0	0
sp|P32458|CDC11_YEAST	C2-C1	-0.150931	0.122955	-1.22753	8	0.254515	0.999512	NA	0	0
sp|P32461|DPH2_YEAST	C2-C1	-0.0396466	0.528734	-0.0749841	8	0.942069	0.999512	NA	0	0
sp|P32462|ERG24_YEAST	C2-C1	-0.472072	0.19174	-2.46204	8	0.0391938	0.999512	NA	0	0
sp|P32463|ACPM_YEAST	C2-C1	-0.082196	0.172806	-0.475654	8	0.647038	0.999512	NA	0	0
sp|P32464|HYM1_YEAST	C2-C1	-0.516472	0.630558	-0.819072	8	0.436464	0.999512	NA	0	0
sp|P32465|HXT1_YEAST	C2-C1	-0.144695	0.578434	-0.25015	8	0.808776	0.999512	NA	0	0
sp|P32466|HXT3_YEAST	C2-C1	-0.0112082	0.0821911	-0.136368	8	0.8949	0.999512	NA	0	0
sp|P32467|HXT4_YEAST	C2-C1	0.00835544	0.387067	0.0215865	8	0.983306	0.999512	NA	0	0
sp|P32468|CDC12_YEAST	C2-C1	0.0138283	0.0380473	0.363449	8	0.725687	0.999512	NA	0	0
sp|P32469|DPH5_YEAST	C2-C1	-0.140175	0.111707	-1.25484	8	0.244952	0.999512	NA	0	0
sp|P32471|EF1B_YEAST	C2-C1	0.116008	0.0707021	1.6408	8	0.139467	0.999512	NA	0.0151515	0.0151515
sp|P32472|FKBP2_YEAST	C2-C1	-0.0725021	0.0804226	-0.901514	8	0.393646	0.999512	NA	0	0
sp|P32473|ODPB_YEAST	C2-C1	0.0461702	0.0853428	0.540997	8	0.603243	0.999512	NA	0	0
sp|P32474|EUG1_YEAST	C2-C1	-0.062111	0.0912056	-0.681	8	0.515096	0.999512	NA	0	0
sp|P32476|ERG1_YEAST	C2-C1	-0.00212908	0.0732029	-0.0290847	8	0.97751	0.999512	NA	0	0
sp|P32477|GSH1_YEAST	C2-C1	0.0458607	0.104953	0.436966	8	0.673691	0.999512	NA	0	0
sp|P32478|HS150_YEAST	C2-C1	-0.092456	0.293256	-0.315274	8	0.76062	0.999512	NA	0	0
sp|P32479|HIR1_YEAST	C2-C1	0.0445751	0.926211	0.0481263	8	0.962795	0.999512	NA	0	0
sp|P32480|HIR2_YEAST	C2-C1	0.0591849	0.169616	0.348934	8	0.736145	0.999512	NA	0	0
sp|P32481|IF2G_YEAST	C2-C1	-0.00423742	0.047922	-0.0884232	8	0.931714	0.999512	NA	0	0
sp|P32485|HOG1_YEAST	C2-C1	-0.0737388	0.127296	-0.579271	8	0.578349	0.999512	NA	0	0
sp|P32486|KRE6_YEAST	C2-C1	0.00981395	0.118132	0.0830758	8	0.935832	0.999512	NA	0	0
sp|P32487|LYP1_YEAST	C2-C1	1.24725	0.989888	1.25999	8	0.243184	0.999512	NA	0	0
sp|P32490|MKK1_YEAST	C2-C1	-0.772737	0.512454	-1.50791	8	0.170007	0.999512	NA	0.0555556	0.0555556
sp|P32491|MKK2_YEAST	C2-C1	-0.108116	0.360029	-0.3003	8	0.771604	0.999512	NA	0	0
sp|P32492|MYO4_YEAST	C2-C1	0.0627547	0.1177	0.533177	8	0.6084	0.999512	NA	0	0
sp|P32494|NGG1_YEAST	C2-C1	-0.00959097	0.0984408	-0.0974288	8	0.924783	0.999512	NA	0	0
sp|P32495|NHP2_YEAST	C2-C1	0.157412	0.103628	1.51901	8	0.167242	0.999512	NA	0	0
sp|P32496|RPN12_YEAST	C2-C1	-0.0955418	0.0806352	-1.18486	8	0.270074	0.999512	NA	0	0
sp|P32497|EIF3C_YEAST	C2-C1	-0.06356	0.0478505	-1.3283	8	0.22072	0.999512	NA	0	0
sp|P32499|NUP2_YEAST	C2-C1	-0.00669555	0.0590404	-0.113406	8	0.912503	0.999512	NA	0.0294118	0
sp|P32500|NDC1_YEAST	C2-C1	0.116226	0.11262	1.03202	8	0.33225	0.999512	NA	0	0
sp|P32501|EI2BE_YEAST	C2-C1	-0.0176855	0.0402295	-0.439615	8	0.67185	0.999512	NA	0	0
sp|P32502|EI2BB_YEAST	C2-C1	-0.0152476	0.124801	-0.122175	8	0.905774	0.999512	NA	0	0
sp|P32504|CBF3A_YEAST	C2-C1	1.03376	0.837922	1.23372	8	0.252321	0.999512	NA	0	0
sp|P32505|NAB2_YEAST	C2-C1	-0.0867673	0.0733317	-1.18322	8	0.27069	0.999512	NA	0	0
sp|P32521|PAN1_YEAST	C2-C1	-0.0359535	0.0846903	-0.424528	8	0.682367	0.999512	NA	0	0
sp|P32523|PRP19_YEAST	C2-C1	-0.0699675	0.0518416	-1.34964	8	0.214077	0.999512	NA	0	0
sp|P32524|PRP21_YEAST	C2-C1	-0.0317709	0.0715019	-0.444336	8	0.668574	0.999512	NA	0	0
sp|P32525|ECM25_YEAST	C2-C1	-0.0574435	0.103879	-0.552984	8	0.595385	0.999512	NA	0	0
sp|P32527|ZUO1_YEAST	C2-C1	0.05296	0.077709	0.681517	8	0.514785	0.999512	NA	0	0
sp|P32528|DUR1_YEAST	C2-C1	0.0020499	0.0504277	0.0406503	8	0.968571	0.999512	NA	0	0
sp|P32529|RPA12_YEAST	C2-C1	-0.0685937	0.194978	-0.351802	8	0.734074	0.999512	NA	0	0
sp|P32558|SPT16_YEAST	C2-C1	-0.0199195	0.0348054	-0.572312	8	0.582832	0.999512	NA	0	0
sp|P32561|RPD3_YEAST	C2-C1	-0.0111533	0.0633428	-0.176078	8	0.864608	0.999512	NA	0.0925926	0.0925926
sp|P32562|CDC5_YEAST	C2-C1	0.330526	0.581118	0.568776	8	0.585117	0.999512	NA	0	0
sp|P32563|VPH1_YEAST	C2-C1	0.0131068	0.0667231	0.196436	8	0.849167	0.999512	NA	0	0
sp|P32564|SCM4_YEAST	C2-C1	0.0674996	0.644214	0.104778	8	0.919131	0.999512	NA	0	0
sp|P32565|RPN2_YEAST	C2-C1	-0.00956645	0.0392587	-0.243677	8	0.813613	0.999512	NA	0.0045045	0.0045045
sp|P32566|SMI1_YEAST	C2-C1	-0.0294793	0.151569	-0.194495	8	0.850637	0.999512	NA	0	0
sp|P32567|PAH1_YEAST	C2-C1	0.597767	0.650976	0.918263	8	0.38533	0.999512	NA	0	0
sp|P32568|SNQ2_YEAST	C2-C1	-0.00955002	0.0781644	-0.122179	8	0.905771	0.999512	NA	0	0
sp|P32569|MED17_YEAST	C2-C1	-0.115667	0.366857	-0.31529	8	0.760609	0.999512	NA	0	0
sp|P32570|MED22_YEAST	C2-C1	-0.010152	0.123267	-0.0823581	8	0.936385	0.999512	NA	0	0
sp|P32571|UBP4_YEAST	C2-C1	0.245345	0.175729	1.39616	8	0.20019	0.999512	NA	0	0
sp|P32578|SIP1_YEAST	C2-C1	-0.287046	0.288753	-0.994088	8	0.349293	0.999512	NA	0	0
sp|P32579|SUA5_YEAST	C2-C1	-0.0408161	0.0681345	-0.599052	8	0.565712	0.999512	NA	0	0
sp|P32582|CBS_YEAST	C2-C1	0.0723383	0.0441588	1.63814	8	0.140026	0.999512	NA	0	0
sp|P32583|SRP40_YEAST	C2-C1	0.0488802	0.134441	0.363581	8	0.725592	0.999512	NA	0	0
sp|P32588|PUB1_YEAST	C2-C1	0.234859	0.368349	0.637599	8	0.541549	0.999512	NA	0	0
sp|P32589|HSP7F_YEAST	C2-C1	0.0298882	0.081743	0.365637	8	0.724115	0.999512	NA	0.00438597	0.00438597
sp|P32590|HSP79_YEAST	C2-C1	-0.0495043	0.0774407	-0.639254	8	0.540525	0.999512	NA	0	0
sp|P32591|SWI3_YEAST	C2-C1	-0.0570491	0.0856069	-0.666407	8	0.5239	0.999512	NA	0	0
sp|P32597|STH1_YEAST	C2-C1	-0.0109997	0.0559746	-0.196511	8	0.84911	0.999512	NA	0	0
sp|P32598|PP12_YEAST	C2-C1	0.0602716	0.103817	0.580557	8	0.577522	0.999512	NA	0	0
sp|P32599|FIMB_YEAST	C2-C1	-0.0856203	0.0765558	-1.1184	8	0.29585	0.999512	NA	0	0
sp|P32600|TOR2_YEAST	C2-C1	-0.190351	0.104464	-1.82218	8	0.105898	0.999512	NA	0	0
sp|P32601|DSS4_YEAST	C2-C1	-0.0791794	0.104475	-0.757878	8	0.470258	0.999512	NA	0	0
sp|P32602|SEC17_YEAST	C2-C1	0.00325893	0.0860835	0.0378578	8	0.970729	0.999512	NA	0	0
sp|P32604|F26_YEAST	C2-C1	-0.0990718	0.620857	-0.159573	8	0.877173	0.999512	NA	0	0
sp|P32605|RU1A_YEAST	C2-C1	-0.534479	0.910141	-0.587249	8	0.573233	0.999512	NA	0	0
sp|P32606|PT127_YEAST	C2-C1	0.132902	0.773635	0.171789	8	0.86787	0.999512	NA	0	0
sp|P32607|RTG1_YEAST	C2-C1	0.0334291	0.103535	0.322877	8	0.755066	0.999512	NA	0	0
sp|P32608|RTG2_YEAST	C2-C1	0.00454716	0.0575685	0.078987	8	0.938983	0.999512	NA	0	0
sp|P32610|VATD_YEAST	C2-C1	-0.0538661	0.134469	-0.400584	8	0.699211	0.999512	NA	0	0
sp|P32611|RML2_YEAST	C2-C1	0.124955	0.0899054	1.38985	8	0.202028	0.999512	NA	0	0
sp|P32614|FRDS_YEAST	C2-C1	-0.0399774	0.0328451	-1.21715	8	0.25823	0.999512	NA	0	0
sp|P32617|IES6_YEAST	C2-C1	-0.23692	0.369077	-0.641927	8	0.538875	0.999512	NA	0	0
sp|P32618|YEF3_YEAST	C2-C1	-0.24812	0.10922	-2.27176	8	0.0527457	0.999512	NA	0	0
sp|P32621|GDA1_YEAST	C2-C1	0.058982	0.0610955	0.965407	8	0.362614	0.999512	NA	0.0128205	0.0128205
sp|P32623|CRH2_YEAST	C2-C1	-0.141947	0.153497	-0.924752	8	0.382142	0.999512	NA	0	0
sp|P32626|ENOPH_YEAST	C2-C1	0.0840844	0.0824677	1.0196	8	0.337757	0.999512	NA	0	0
sp|P32628|RAD23_YEAST	C2-C1	-0.0420713	0.054251	-0.775492	8	0.460356	0.999512	NA	0.0119048	0.0119048
sp|P32629|ANP1_YEAST	C2-C1	-0.0573225	0.0664587	-0.862528	8	0.413504	0.999512	NA	0	0
sp|P32639|BRR2_YEAST	C2-C1	0.101063	0.17937	0.563436	8	0.588578	0.999512	NA	0	0
sp|P32642|GLRX4_YEAST	C2-C1	-0.0370205	0.0922558	-0.401281	8	0.698718	0.999512	NA	0	0
sp|P32644|ECM32_YEAST	C2-C1	-0.0638868	0.11142	-0.573387	8	0.582138	0.999512	NA	0.0128205	0.0128205
sp|P32656|CHAC_YEAST	C2-C1	0.0200541	1.46234	0.0137138	8	0.989394	0.999512	NA	0	0
sp|P32657|CHD1_YEAST	C2-C1	0.0057479	0.0238801	0.240698	8	0.815843	0.999512	NA	0	0
sp|P32660|ATC5_YEAST	C2-C1	0.000729849	0.062108	0.0117513	8	0.990912	0.999512	NA	0	0
sp|P32767|KA122_YEAST	C2-C1	0.140648	0.265463	0.529822	8	0.61062	0.999512	NA	0	0
sp|P32769|HBS1_YEAST	C2-C1	0.0283415	0.1208	0.234616	8	0.8204	0.999512	NA	0	0
sp|P32770|NRP1_YEAST	C2-C1	-0.118008	0.0952658	-1.23873	8	0.250559	0.999512	NA	0	0
sp|P32771|FADH_YEAST	C2-C1	-0.0254704	0.0936047	-0.272106	8	0.792431	0.999512	NA	0.0128205	0.0128205
sp|P32774|T2AG_YEAST	C2-C1	-0.0868298	0.295024	-0.294314	8	0.77601	0.999512	NA	0	0
sp|P32775|GLGB_YEAST	C2-C1	-0.163738	0.0901996	-1.81528	8	0.107022	0.999512	NA	0	0
sp|P32776|TFB1_YEAST	C2-C1	0.0296044	0.085569	0.34597	8	0.738287	0.999512	NA	0	0
sp|P32781|AGA2_YEAST	C2-C1	0.162074	0.207267	0.78196	8	0.456756	0.999512	NA	0	0
sp|P32783|MCES_YEAST	C2-C1	-0.0177281	0.0723581	-0.245005	8	0.81262	0.999512	NA	0	0
sp|P32784|GPT1_YEAST	C2-C1	-0.191092	0.139254	-1.37226	8	0.207225	0.999512	NA	0	0
sp|P32785|FMT_YEAST	C2-C1	0.0685472	0.291502	0.235152	8	0.819998	0.999512	NA	0	0
sp|P32786|RRN6_YEAST	C2-C1	-0.521355	0.735888	-0.70847	8	0.498774	0.999512	NA	0	0
sp|P32787|MG101_YEAST	C2-C1	-0.0259749	0.111782	-0.232371	8	0.822084	0.999512	NA	0	0
sp|P32788|YBB0_YEAST	C2-C1	0.0350826	0.214759	0.163358	8	0.874288	0.999512	NA	0	0
sp|P32790|SLA1_YEAST	C2-C1	-0.101901	0.0782352	-1.3025	8	0.228989	0.999512	NA	0	0
sp|P32792|YHH7_YEAST	C2-C1	-0.291342	0.671661	-0.433764	8	0.67592	0.999512	NA	0	0
sp|P32793|YSC84_YEAST	C2-C1	0.202678	0.441818	0.458736	8	0.658629	0.999512	NA	0	0
sp|P32794|AFG2_YEAST	C2-C1	0.0143339	0.0546624	0.262226	8	0.799773	0.999512	NA	0	0
sp|P32795|YME1_YEAST	C2-C1	0.0376125	0.131972	0.285003	8	0.782881	0.999512	NA	0	0
sp|P32796|CACP_YEAST	C2-C1	-0.740281	1.50787	-0.490946	8	0.636648	0.999512	NA	0	0
sp|P32798|COT1_YEAST	C2-C1	-0.00229645	0.15416	-0.0148966	8	0.988479	0.999512	NA	0	0
sp|P32799|COX13_YEAST	C2-C1	-0.138368	0.477077	-0.290034	8	0.779166	0.999512	NA	0	0
sp|P32802|TMN1_YEAST	C2-C1	-0.019621	0.109247	-0.179602	8	0.861931	0.999512	NA	0	0
sp|P32803|EMP24_YEAST	C2-C1	-0.0461549	0.144659	-0.319061	8	0.757852	0.999512	NA	0.0416667	0.0416667
sp|P32806|GYP6_YEAST	C2-C1	-0.0545022	0.197909	-0.27539	8	0.789996	0.999512	NA	0	0
sp|P32807|KU70_YEAST	C2-C1	-0.712332	0.80482	-0.885083	8	0.40193	0.999512	NA	0	0
sp|P32830|TIM12_YEAST	C2-C1	-0.333425	0.335004	-0.995288	8	0.348744	0.999512	NA	0	0
sp|P32831|NGR1_YEAST	C2-C1	-0.232786	0.224775	-1.03564	8	0.330659	0.999512	NA	0	0
sp|P32832|RSC7_YEAST	C2-C1	-0.0583041	0.0959953	-0.607364	8	0.560449	0.999512	NA	0.00925926	0.00925926
sp|P32836|GSP2_YEAST	C2-C1	0.812017	0.688002	1.18025	8	0.271801	0.999512	NA	0	0
sp|P32839|BCS1_YEAST	C2-C1	0.134295	0.276907	0.484983	8	0.640689	0.999512	NA	0	0
sp|P32841|RE114_YEAST	C2-C1	-0.0317015	0.396145	-0.0800252	8	0.938183	0.999512	NA	0	0
sp|P32842|VATL2_YEAST	C2-C1	0.547514	0.351158	1.55917	8	0.157576	0.999512	NA	0	0
sp|P32843|YME2_YEAST	C2-C1	-0.0927119	0.0899164	-1.03109	8	0.33266	0.999512	NA	0	0
sp|P32844|SEC6_YEAST	C2-C1	0.298292	0.342804	0.870153	8	0.409566	0.999512	NA	0	0
sp|P32849|RAD5_YEAST	C2-C1	0.151049	1.00053	0.150968	8	0.883738	0.999512	NA	0	0
sp|P32854|PEP12_YEAST	C2-C1	-0.150616	0.151181	-0.99626	8	0.348299	0.999512	NA	0	0
sp|P32855|SEC8_YEAST	C2-C1	-0.0476758	0.271589	-0.175544	8	0.865014	0.999512	NA	0	0
sp|P32857|PTM1_YEAST	C2-C1	-0.0771977	0.126956	-0.608066	8	0.560006	0.999512	NA	0	0
sp|P32860|NFU1_YEAST	C2-C1	-0.0693095	0.11902	-0.582336	8	0.57638	0.999512	NA	0	0
sp|P32861|UGPA1_YEAST	C2-C1	-0.0319101	0.0698901	-0.456575	8	0.660117	0.999512	NA	0	0
sp|P32864|RAEP_YEAST	C2-C1	0.00739695	0.086831	0.0851879	8	0.934205	0.999512	NA	0.0166667	0.0166667
sp|P32873|BEM3_YEAST	C2-C1	-0.262549	0.243411	-1.07862	8	0.3122	0.999512	NA	0	0
sp|P32874|HFA1_YEAST	C2-C1	-0.514878	0.405325	-1.27028	8	0.239681	0.999512	NA	0	0
sp|P32875|LIPA_YEAST	C2-C1	-0.121486	0.149235	-0.814056	8	0.43917	0.999512	NA	0	0
sp|P32891|DLD1_YEAST	C2-C1	-0.132167	0.0948435	-1.39353	8	0.200954	0.999512	NA	0	0
sp|P32892|DRS1_YEAST	C2-C1	-0.0539532	0.0680714	-0.792598	8	0.450875	0.999512	NA	0	0
sp|P32895|KPR1_YEAST	C2-C1	0.0782458	0.0930241	0.841135	8	0.424699	0.999512	NA	0	0
sp|P32896|PDC2_YEAST	C2-C1	0.0300273	0.18383	0.163343	8	0.874299	0.999512	NA	0	0
sp|P32897|TIM23_YEAST	C2-C1	0.0528109	0.0944838	0.558941	8	0.5915	0.999512	NA	0.0277778	0.0277778
sp|P32898|CYM1_YEAST	C2-C1	0.0076466	0.0494874	0.154516	8	0.88103	0.999512	NA	0	0
sp|P32899|IMP3_YEAST	C2-C1	-0.00235162	0.0814863	-0.0288591	8	0.977684	0.999512	NA	0	0
sp|P32900|SKG6_YEAST	C2-C1	-0.335498	0.517504	-0.6483	8	0.534952	0.999512	NA	0	0
sp|P32901|PTR2_YEAST	C2-C1	-0.00866973	0.176269	-0.0491846	8	0.961978	0.999512	NA	0.0208333	0.0208333
sp|P32902|RT04_YEAST	C2-C1	0.000376286	0.0897548	0.00419238	8	0.996758	0.999512	NA	0	0
sp|P32904|RM06_YEAST	C2-C1	0.0674197	0.318164	0.211902	8	0.837482	0.999512	NA	0	0
sp|P32906|MNS1_YEAST	C2-C1	-0.0162577	0.0584642	-0.27808	8	0.788003	0.999512	NA	0	0
sp|P32908|SMC1_YEAST	C2-C1	-0.0966672	0.0875499	-1.10414	8	0.301633	0.999512	NA	0	0
sp|P32909|SMY2_YEAST	C2-C1	0.0155945	0.150038	0.103937	8	0.919778	0.999512	NA	0	0
sp|P32910|RPC6_YEAST	C2-C1	-0.034861	0.282355	-0.123465	8	0.904784	0.999512	NA	0	0
sp|P32911|SUI1_YEAST	C2-C1	0.0317657	0.167467	0.189684	8	0.854281	0.999512	NA	0	0
sp|P32912|VAM7_YEAST	C2-C1	-0.416979	0.39535	-1.05471	8	0.322367	0.999512	NA	0	0
sp|P32913|VPS17_YEAST	C2-C1	0.091333	0.140041	0.652186	8	0.532568	0.999512	NA	0	0
sp|P32914|SPT4_YEAST	C2-C1	-0.0253826	0.111449	-0.22775	8	0.825553	0.999512	NA	0	0
sp|P32915|SC61A_YEAST	C2-C1	0.0452936	0.0838908	0.539912	8	0.603958	0.999512	NA	0	0
sp|P32916|SRPR_YEAST	C2-C1	0.00983497	0.072517	0.135623	8	0.89547	0.999512	NA	0	0
sp|P32917|STE5_YEAST	C2-C1	-0.316598	0.150115	-2.10904	8	0.0679746	0.999512	NA	0	0
sp|P32939|YPT7_YEAST	C2-C1	0.013391	0.108494	0.123427	8	0.904814	0.999512	NA	0	0
sp|P32944|SWE1_YEAST	C2-C1	-0.00507871	0.49599	-0.0102395	8	0.992081	0.999512	NA	0	0
sp|P33201|MRT4_YEAST	C2-C1	0.0398282	0.0585367	0.680397	8	0.515457	0.999512	NA	0	0
sp|P33202|UFD4_YEAST	C2-C1	-0.115016	0.0542727	-2.11923	8	0.0669054	0.999512	NA	0	0
sp|P33203|PRP40_YEAST	C2-C1	0.0407623	0.662255	0.0615508	8	0.952431	0.999512	NA	0	0
sp|P33204|ARPC4_YEAST	C2-C1	-1.10104	0.675913	-1.62896	8	0.14197	0.999512	NA	0	0
sp|P33296|UBC6_YEAST	C2-C1	0.0489876	0.123723	0.395945	8	0.702496	0.999512	NA	0	0
sp|P33297|PRS6A_YEAST	C2-C1	0.0072355	0.0414966	0.174364	8	0.865911	0.999512	NA	0	0
sp|P33298|PRS6B_YEAST	C2-C1	-0.0534825	0.0536212	-0.997413	8	0.347773	0.999512	NA	0	0
sp|P33299|PRS7_YEAST	C2-C1	-0.0245877	0.045564	-0.53963	8	0.604143	0.999512	NA	0	0
sp|P33302|PDR5_YEAST	C2-C1	-0.0268481	0.056964	-0.471316	8	0.650001	0.999512	NA	0	0
sp|P33307|CSE1_YEAST	C2-C1	-0.00350496	0.0468649	-0.0747886	8	0.942219	0.999512	NA	0.015873	0.015873
sp|P33308|MED9_YEAST	C2-C1	-0.362688	0.265146	-1.36788	8	0.208537	0.999512	NA	0	0
sp|P33309|DOM34_YEAST	C2-C1	0.0369933	0.0770351	0.480213	8	0.643931	0.999512	NA	0	0
sp|P33310|MDL1_YEAST	C2-C1	-0.0684662	0.150233	-0.455735	8	0.660696	0.999512	NA	0	0
sp|P33311|MDL2_YEAST	C2-C1	-0.27046	0.138742	-1.94938	8	0.087076	0.999512	NA	0.0277778	0.0277778
sp|P33313|CNS1_YEAST	C2-C1	-0.0112457	0.123378	-0.0911485	8	0.929616	0.999512	NA	0	0
sp|P33314|BUD2_YEAST	C2-C1	0.0156149	0.428212	0.0364652	8	0.971805	0.999512	NA	0	0
sp|P33315|TKT2_YEAST	C2-C1	0.457164	0.299209	1.52791	8	0.165056	0.999512	NA	0	0
sp|P33317|DUT_YEAST	C2-C1	-0.294049	0.187992	-1.56416	8	0.156409	0.999512	NA	0	0
sp|P33322|CBF5_YEAST	C2-C1	-0.00287937	0.0520773	-0.0552902	8	0.957263	0.999512	NA	0	0
sp|P33324|YKJ1_YEAST	C2-C1	-0.151411	0.18008	-0.840798	8	0.424877	0.999512	NA	0	0
sp|P33327|DHE2_YEAST	C2-C1	-0.0155102	0.0424607	-0.365284	8	0.724369	0.999512	NA	0	0
sp|P33328|SNC2_YEAST	C2-C1	0.0782036	0.205981	0.379664	8	0.714075	0.999512	NA	0	0
sp|P33330|SERC_YEAST	C2-C1	0.0107757	0.0490946	0.219488	8	0.831767	0.999512	NA	0	0
sp|P33331|NTF2_YEAST	C2-C1	-0.602115	0.626091	-0.961705	8	0.364361	0.999512	NA	0	0
sp|P33332|SEC3_YEAST	C2-C1	-0.00551859	0.11584	-0.0476398	8	0.963171	0.999512	NA	0	0
sp|P33333|PLSC_YEAST	C2-C1	-0.0055104	0.0543593	-0.10137	8	0.921751	0.999512	NA	0	0
sp|P33334|PRP8_YEAST	C2-C1	0.120759	0.0978564	1.23404	8	0.252207	0.999512	NA	0	0
sp|P33336|SKN1_YEAST	C2-C1	-0.569789	0.426365	-1.33639	8	0.218182	0.999512	NA	0	0
sp|P33338|SLA2_YEAST	C2-C1	0.0262621	0.0521762	0.503334	8	0.628293	0.999512	NA	0	0
sp|P33339|TFC4_YEAST	C2-C1	-0.235801	1.02328	-0.230438	8	0.823535	0.999512	NA	0	0
sp|P33399|LHP1_YEAST	C2-C1	0.0643295	0.122655	0.524476	8	0.614166	0.999512	NA	0.0277778	0.0277778
sp|P33401|PGM1_YEAST	C2-C1	-0.00161136	0.0460089	-0.0350228	8	0.97292	0.999512	NA	0	0
sp|P33411|PRP18_YEAST	C2-C1	-0.118464	0.0719117	-1.64736	8	0.138099	0.999512	NA	0	0
sp|P33412|ECT1_YEAST	C2-C1	0.103719	0.104348	0.993978	8	0.349343	0.999512	NA	0	0
sp|P33416|HSP78_YEAST	C2-C1	-0.0473432	0.0665259	-0.711652	8	0.496905	0.999512	NA	0	0
sp|P33417|IXR1_YEAST	C2-C1	-0.189446	0.288632	-0.656358	8	0.530016	0.999512	NA	0	0
sp|P33418|XPOT_YEAST	C2-C1	0.0206541	0.0542818	0.380497	8	0.713481	0.999512	NA	0	0
sp|P33421|SDH3_YEAST	C2-C1	0.129561	0.125557	1.03188	8	0.332311	0.999512	NA	0	0
sp|P33441|MFT1_YEAST	C2-C1	-0.0895435	0.162279	-0.551787	8	0.596167	0.999512	NA	0	0
sp|P33442|RS3A1_YEAST	C2-C1	-0.33739	0.211156	-1.59783	8	0.148749	0.999512	NA	0	0
sp|P33734|HIS5_YEAST	C2-C1	-0.0922209	0.0290343	-3.17627	8	0.0130706	0.999512	NA	0.00617284	0.00617284
sp|P33748|MSN2_YEAST	C2-C1	0.0799406	0.183554	0.435516	8	0.6747	0.999512	NA	0	0
sp|P33749|MSN4_YEAST	C2-C1	-0.163686	0.302342	-0.541394	8	0.602982	0.999512	NA	0	0
sp|P33750|DCA13_YEAST	C2-C1	-0.105719	0.138435	-0.763674	8	0.466984	0.999512	NA	0	0
sp|P33751|PAD1_YEAST	C2-C1	0.194365	0.2022	0.961251	8	0.364575	0.999512	NA	0	0
sp|P33753|TRM2_YEAST	C2-C1	0.0977241	0.233402	0.418694	8	0.686454	0.999512	NA	0	0
sp|P33754|SEC66_YEAST	C2-C1	0.00869062	0.0939236	0.0925285	8	0.928553	0.999512	NA	0	0
sp|P33755|NPL4_YEAST	C2-C1	-0.0760023	0.0795248	-0.955706	8	0.367205	0.999512	NA	0	0
sp|P33759|RT05_YEAST	C2-C1	0.158278	0.2504	0.632101	8	0.544957	0.999512	NA	0	0
sp|P33760|PEX6_YEAST	C2-C1	0.208687	1.10599	0.188688	8	0.855036	0.999512	NA	0	0
sp|P33767|OSTB_YEAST	C2-C1	0.0631263	0.0419505	1.50478	8	0.170795	0.999512	NA	0	0
sp|P33775|PMT1_YEAST	C2-C1	0.0534838	0.0774354	0.690689	8	0.509301	0.999512	NA	0	0
sp|P33891|TIP20_YEAST	C2-C1	-0.158861	0.0983612	-1.61507	8	0.144958	0.999512	NA	0.0277778	0.0277778
sp|P33892|GCN1_YEAST	C2-C1	-0.0233464	0.031391	-0.743729	8	0.478312	0.999512	NA	0.00161812	0.00161812
sp|P33893|GATB_YEAST	C2-C1	0.0683297	0.191373	0.357049	8	0.73029	0.999512	NA	0	0
sp|P33894|STE13_YEAST	C2-C1	-0.472219	0.383185	-1.23235	8	0.252805	0.999512	NA	0	0
sp|P33895|NUF2_YEAST	C2-C1	0.319949	0.461893	0.692691	8	0.508109	0.999512	NA	0	0
sp|P34072|MKS1_YEAST	C2-C1	-0.236802	0.551293	-0.429539	8	0.678865	0.999512	NA	0	0
sp|P34077|NIC96_YEAST	C2-C1	-0.0316775	0.0432408	-0.732584	8	0.48472	0.999512	NA	0	0
sp|P34078|LTV1_YEAST	C2-C1	0.107613	0.0907925	1.18526	8	0.269926	0.999512	NA	0	0
sp|P34087|RPB7_YEAST	C2-C1	0.00109859	0.102407	0.0107277	8	0.991703	0.999512	NA	0	0
sp|P34110|VPS35_YEAST	C2-C1	-0.156864	0.0808213	-1.94087	8	0.0882276	0.999512	NA	0	0
sp|P34111|TFC3_YEAST	C2-C1	0.172804	0.348555	0.495772	8	0.633387	0.999512	NA	0	0
sp|P34160|NCBP1_YEAST	C2-C1	0.0591399	0.086787	0.681437	8	0.514834	0.999512	NA	0	0
sp|P34162|MED20_YEAST	C2-C1	0.0939777	0.137397	0.683987	8	0.513305	0.999512	NA	0	0
sp|P34163|TGL1_YEAST	C2-C1	-0.0500146	0.107576	-0.464921	8	0.65438	0.999512	NA	0	0
sp|P34164|SIP2_YEAST	C2-C1	0.109866	0.185134	0.593441	8	0.56928	0.999512	NA	0	0
sp|P34167|IF4B_YEAST	C2-C1	0.0779835	0.0420636	1.85394	8	0.100864	0.999512	NA	0	0
sp|P34216|EDE1_YEAST	C2-C1	-0.0155991	0.0509142	-0.30638	8	0.767137	0.999512	NA	0	0
sp|P34217|PIN4_YEAST	C2-C1	-0.0031372	0.0823243	-0.0381079	8	0.970535	0.999512	NA	0.0166667	0.0166667
sp|P34218|SAS3_YEAST	C2-C1	1.04744	0.5462	1.91769	8	0.091441	0.999512	NA	0	0
sp|P34220|YBF5_YEAST	C2-C1	0.0312797	0.140517	0.222605	8	0.829421	0.999512	NA	0	0
sp|P34221|PP2C3_YEAST	C2-C1	-0.019306	0.0889245	-0.217106	8	0.833561	0.999512	NA	0	0
sp|P34222|PTH2_YEAST	C2-C1	0.0125303	0.104713	0.119664	8	0.9077	0.999512	NA	0	0
sp|P34223|UBX1_YEAST	C2-C1	0.00961458	0.0671489	0.143183	8	0.889686	0.999512	NA	0	0
sp|P34226|SKT5_YEAST	C2-C1	-0.0849086	0.113507	-0.748047	8	0.475844	0.999512	NA	0	0
sp|P34227|PRX1_YEAST	C2-C1	-0.00166823	0.069954	-0.0238475	8	0.981558	0.999512	NA	0	0
sp|P34228|SEF1_YEAST	C2-C1	-0.685379	0.77917	-0.879626	8	0.404709	0.999512	NA	0	0
sp|P34232|MTR2_YEAST	C2-C1	-0.0190099	0.166434	-0.114219	8	0.911879	0.999512	NA	0	0
sp|P34237|CASP_YEAST	C2-C1	-0.0195872	0.0789882	-0.247977	8	0.810399	0.999512	NA	0	0
sp|P34240|ZRT3_YEAST	C2-C1	-0.24006	0.0873726	-2.74755	8	0.0251542	0.999512	NA	0	0
sp|P34241|URB1_YEAST	C2-C1	0.0319559	0.0677905	0.471391	8	0.649949	0.999512	NA	0.00617284	0.00617284
sp|P34243|HCS1_YEAST	C2-C1	-0.139282	0.20744	-0.671432	8	0.520858	0.999512	NA	0	0
sp|P34244|HSL1_YEAST	C2-C1	-0.0664641	0.562583	-0.118141	8	0.908868	0.999512	NA	0.0416667	0.0416667
sp|P34247|UTP11_YEAST	C2-C1	0.198684	0.143256	1.38692	8	0.202884	0.999512	NA	0	0
sp|P34248|YKK0_YEAST	C2-C1	0.0290422	0.100776	0.288187	8	0.780529	0.999512	NA	0	0
sp|P34250|SEG2_YEAST	C2-C1	0.0397494	0.0966961	0.411076	8	0.691808	0.999512	NA	0	0
sp|P34253|KTI12_YEAST	C2-C1	-0.00743678	0.137919	-0.0539212	8	0.95832	0.999512	NA	0	0
sp|P34730|BMH2_YEAST	C2-C1	-0.213939	0.197488	-1.0833	8	0.310242	0.999512	NA	0	0
sp|P34756|FAB1_YEAST	C2-C1	0.125742	0.185594	0.677513	8	0.517191	0.999512	NA	0	0
sp|P34760|TSA1_YEAST	C2-C1	-0.0521244	0.0725257	-0.718703	8	0.492778	0.999512	NA	0	0
sp|P34761|WHI3_YEAST	C2-C1	-0.0559366	0.316845	-0.176542	8	0.864255	0.999512	NA	0	0
sp|P34909|NOT4_YEAST	C2-C1	-0.103516	0.19659	-0.526559	8	0.612783	0.999512	NA	0	0
sp|P35056|PEX5_YEAST	C2-C1	1.53288	2.5924	0.591296	8	0.570648	0.999512	NA	0	0
sp|P35127|UBL1_YEAST	C2-C1	-0.0949577	0.216398	-0.43881	8	0.672409	0.999512	NA	0	0
sp|P35169|TOR1_YEAST	C2-C1	-0.408196	0.259412	-1.57354	8	0.154239	0.999512	NA	0.0238095	0.0238095
sp|P35172|TREB_YEAST	C2-C1	0.172709	0.815696	0.211731	7	0.838349	0.999512	NA	0	0
sp|P35176|CYPD_YEAST	C2-C1	-0.0294805	0.0800034	-0.368491	8	0.722068	0.999512	NA	0	0
sp|P35177|SPT7_YEAST	C2-C1	-0.207481	0.197076	-1.0528	8	0.323191	0.999512	NA	0	0
sp|P35178|RRP1_YEAST	C2-C1	-0.0236681	0.118964	-0.198952	8	0.847264	0.999512	NA	0	0
sp|P35179|SC61G_YEAST	C2-C1	-0.138272	0.10761	-1.28494	8	0.234765	0.999512	NA	0	0
sp|P35180|TOM20_YEAST	C2-C1	-0.0851262	0.0839282	-1.01427	8	0.340142	0.999512	NA	0	0
sp|P35181|AP1S1_YEAST	C2-C1	0.0486568	0.108387	0.448918	8	0.665402	0.999512	NA	0	0
sp|P35182|PP2C1_YEAST	C2-C1	-0.207475	0.23226	-0.893291	8	0.397776	0.999512	NA	0	0
sp|P35183|AST1_YEAST	C2-C1	0.0377492	0.163047	0.231524	8	0.82272	0.999512	NA	0	0
sp|P35184|SQT1_YEAST	C2-C1	0.00892143	0.126986	0.0702554	8	0.945715	0.999512	NA	0	0
sp|P35189|TAF14_YEAST	C2-C1	-0.048071	0.0867744	-0.553977	8	0.594736	0.999512	NA	0	0
sp|P35191|MDJ1_YEAST	C2-C1	-0.0335255	0.134349	-0.249541	8	0.80923	0.999512	NA	0	0
sp|P35193|ATG19_YEAST	C2-C1	0.47793	0.539711	0.88553	8	0.401703	0.999512	NA	0.0555556	0.0555556
sp|P35194|UTP20_YEAST	C2-C1	-0.00572981	0.0596192	-0.0961068	8	0.9258	0.999512	NA	0.00900901	0.00900901
sp|P35196|RER2_YEAST	C2-C1	-0.00518624	0.114787	-0.0451816	8	0.96507	0.999512	NA	0	0
sp|P35197|GCS1_YEAST	C2-C1	-0.0647652	0.0718765	-0.901062	8	0.393873	0.999512	NA	0	0
sp|P35202|THI80_YEAST	C2-C1	-0.0136226	0.106915	-0.127415	8	0.901756	0.999512	NA	0	0
sp|P35206|CSG2_YEAST	C2-C1	0.447723	0.336942	1.32878	8	0.220569	0.999512	NA	0	0
sp|P35207|SKI2_YEAST	C2-C1	0.00441991	0.0543312	0.0813512	8	0.937161	0.999512	NA	0	0
sp|P35209|SPT21_YEAST	C2-C1	0.57015	1.89752	0.300472	8	0.771478	0.999512	NA	0	0
sp|P35691|TCTP_YEAST	C2-C1	-0.0617897	0.0792314	-0.779864	8	0.45792	0.999512	NA	0	0
sp|P35718|RPC8_YEAST	C2-C1	0.226542	0.152286	1.48761	8	0.17517	0.999512	NA	0	0
sp|P35719|MRP8_YEAST	C2-C1	-0.0525011	0.0873472	-0.601062	8	0.564437	0.999512	NA	0.0166667	0.0166667
sp|P35723|YET1_YEAST	C2-C1	0.0370381	0.06369	0.581538	8	0.576892	0.999512	NA	0	0
sp|P35724|MNR2_YEAST	C2-C1	0.0201492	0.135979	0.148179	8	0.885868	0.999512	NA	0	0
sp|P35725|YKG3_YEAST	C2-C1	0.142268	0.429052	0.331588	8	0.74872	0.999512	NA	0	0
sp|P35728|MPE1_YEAST	C2-C1	-0.33953	0.288368	-1.17742	8	0.272867	0.999512	NA	0	0
sp|P35729|NU120_YEAST	C2-C1	0.0376804	0.112812	0.334011	8	0.746959	0.999512	NA	0	0
sp|P35732|DEF1_YEAST	C2-C1	-0.0397392	0.121284	-0.327655	8	0.751583	0.999512	NA	0	0
sp|P35734|ASK1_YEAST	C2-C1	-0.502274	0.188401	-2.66599	8	0.0285391	0.999512	NA	0.0416667	0.0416667
sp|P35817|BDF1_YEAST	C2-C1	-0.110207	0.107762	-1.0227	8	0.336379	0.999512	NA	0	0
sp|P35844|KES1_YEAST	C2-C1	-0.0835522	0.0739734	-1.12949	8	0.291418	0.999512	NA	0	0
sp|P35845|OSH1_YEAST	C2-C1	-0.0124579	0.0591606	-0.210578	8	0.838481	0.999512	NA	0	0
sp|P35995|YKW2_YEAST	C2-C1	0.479198	0.781069	0.613515	8	0.556573	0.999512	NA	0	0
sp|P35996|RM38_YEAST	C2-C1	-0.00947613	0.22255	-0.0425798	8	0.96708	0.999512	NA	0.111111	0.111111
sp|P36000|AP1B1_YEAST	C2-C1	-0.0513989	0.115021	-0.446865	8	0.666823	0.999512	NA	0	0
sp|P36006|MYO3_YEAST	C2-C1	0.0260977	0.0974716	0.267746	8	0.795668	0.999512	NA	0.0238095	0.0238095
sp|P36008|EF1G2_YEAST	C2-C1	0.0212962	0.0513554	0.414683	8	0.689271	0.999512	NA	0	0
sp|P36009|DHR2_YEAST	C2-C1	-0.0998742	0.779464	-0.128132	8	0.901207	0.999512	NA	0	0
sp|P36010|NDK_YEAST	C2-C1	0.0290846	0.089795	0.3239	8	0.754319	0.999512	NA	0	0
sp|P36013|MAOM_YEAST	C2-C1	0.0186049	0.0662864	0.280675	8	0.786082	0.999512	NA	0.00617284	0.00617284
sp|P36015|YKT6_YEAST	C2-C1	0.0324099	0.0712897	0.454622	8	0.661464	0.999512	NA	0	0
sp|P36016|LHS1_YEAST	C2-C1	-0.0104391	0.0614465	-0.169888	8	0.869315	0.999512	NA	0	0
sp|P36017|VPS21_YEAST	C2-C1	-0.116272	0.0671272	-1.73211	8	0.121491	0.999512	NA	0	0
sp|P36018|YPT52_YEAST	C2-C1	-0.0565316	0.0782521	-0.72243	8	0.490607	0.999512	NA	0	0
sp|P36019|YPT53_YEAST	C2-C1	0.265994	0.822828	0.323269	8	0.75478	0.999512	NA	0	0
sp|P36024|SIS2_YEAST	C2-C1	0.0473157	0.130005	0.363951	8	0.725325	0.999512	NA	0	0
sp|P36027|MID2_YEAST	C2-C1	-0.682864	0.940782	-0.725847	8	0.48862	0.999512	NA	0.0833333	0.0833333
sp|P36029|TPO5_YEAST	C2-C1	-0.049327	0.22859	-0.215788	8	0.834553	0.999512	NA	0	0
sp|P36034|COS9_YEAST	C2-C1	-0.318455	0.232744	-1.36827	8	0.20842	0.999512	NA	0	0
sp|P36036|YRA2_YEAST	C2-C1	-0.0597305	0.187012	-0.319393	8	0.757609	0.999512	NA	0	0
sp|P36037|DOA1_YEAST	C2-C1	-0.0238216	0.0563828	-0.422498	8	0.683788	0.999512	NA	0	0
sp|P36039|EMC3_YEAST	C2-C1	-0.112392	0.500833	-0.22441	8	0.828063	0.999512	NA	0	0
sp|P36040|POC2_YEAST	C2-C1	0.0297923	0.104785	0.284317	8	0.783388	0.999512	NA	0	0
sp|P36041|EAP1_YEAST	C2-C1	-0.00779236	0.0822422	-0.094749	8	0.926844	0.999512	NA	0.0166667	0.0166667
sp|P36046|MIA40_YEAST	C2-C1	-0.297093	0.209116	-1.42071	8	0.193181	0.999512	NA	0	0
sp|P36047|SDS22_YEAST	C2-C1	0.0145112	0.0737856	0.196667	8	0.848992	0.999512	NA	0	0
sp|P36048|SN114_YEAST	C2-C1	0.0321691	0.0690239	0.466058	8	0.653601	0.999512	NA	0	0
sp|P36049|EBP2_YEAST	C2-C1	-0.038683	0.0603261	-0.641231	8	0.539304	0.999512	NA	0	0
sp|P36051|MCD4_YEAST	C2-C1	0.000365696	0.0602689	0.00606775	8	0.995307	0.999512	NA	0	0
sp|P36053|ELF1_YEAST	C2-C1	-0.310189	0.213035	-1.45604	8	0.183475	0.999512	NA	0	0
sp|P36054|RCN1_YEAST	C2-C1	-1.78552	1.21874	-1.46505	8	0.181071	0.999512	NA	0	0
sp|P36056|RT22_YEAST	C2-C1	-0.366264	0.404588	-0.905277	8	0.391766	0.999512	NA	0	0
sp|P36057|SRPB_YEAST	C2-C1	0.257261	0.22554	1.14065	8	0.287011	0.999512	NA	0	0
sp|P36059|NNRD_YEAST	C2-C1	-0.186974	0.0976918	-1.91391	8	0.0919747	0.999512	NA	0	0
sp|P36060|MCR1_YEAST	C2-C1	0.00471642	0.0807203	0.0584292	8	0.95484	0.999512	NA	0.0111111	0.0111111
sp|P36062|AVT3_YEAST	C2-C1	0.265433	0.380488	0.697614	8	0.505185	0.999512	NA	0	0
sp|P36064|COXM1_YEAST	C2-C1	0.0283505	0.136477	0.207731	8	0.840629	0.999512	NA	0	0
sp|P36068|SHE2_YEAST	C2-C1	-0.114938	0.102942	-1.11653	8	0.296604	0.999512	NA	0	0
sp|P36069|PMU1_YEAST	C2-C1	0.079716	0.0935105	0.852481	8	0.418735	0.999512	NA	0	0
sp|P36076|CAB3_YEAST	C2-C1	-0.0314662	0.0503924	-0.624424	8	0.549738	0.999512	NA	0	0
sp|P36077|SRX1_YEAST	C2-C1	-2.44074	0.636881	-3.83234	8	0.00500126	0.95101	NA	0	0
sp|P36080|RRP14_YEAST	C2-C1	0.0196019	0.106507	0.184043	8	0.858559	0.999512	NA	0	0
sp|P36081|YKH7_YEAST	C2-C1	-0.0118853	0.115867	-0.102577	8	0.920823	0.999512	NA	0	0
sp|P36083|YKH5_YEAST	C2-C1	-0.220834	0.126141	-1.7507	8	0.118108	0.999512	NA	0	0
sp|P36084|MUD2_YEAST	C2-C1	-0.660184	0.258489	-2.55401	8	0.033962	0.999512	NA	0	0
sp|P36088|FRMSR_YEAST	C2-C1	-0.906511	0.880596	-1.02943	8	0.333394	0.999512	NA	0	0
sp|P36090|ANR2_YEAST	C2-C1	-0.00885738	0.0994804	-0.0890364	8	0.931242	0.999512	NA	0	0
sp|P36091|DCW1_YEAST	C2-C1	-0.0545265	0.166109	-0.328257	8	0.751144	0.999512	NA	0	0
sp|P36094|SPC42_YEAST	C2-C1	-0.0771962	0.107327	-0.719261	8	0.492453	0.999512	NA	0	0
sp|P36095|VPS24_YEAST	C2-C1	-0.195718	0.419765	-0.466257	8	0.653464	0.999512	NA	0	0
sp|P36100|T2EA_YEAST	C2-C1	0.234926	0.200922	1.16924	8	0.275964	0.999512	NA	0.0238095	0.0238095
sp|P36101|YKC7_YEAST	C2-C1	-0.0889086	0.150324	-0.591447	8	0.570551	0.999512	NA	0	0
sp|P36102|PAN3_YEAST	C2-C1	0.0133851	0.12454	0.107476	8	0.917058	0.999512	NA	0	0
sp|P36104|SWD2_YEAST	C2-C1	-0.0934719	0.120911	-0.773062	8	0.461714	0.999512	NA	0	0
sp|P36105|RL14A_YEAST	C2-C1	0.0562009	0.189806	0.296097	8	0.774697	0.999512	NA	0	0
sp|P36106|BYE1_YEAST	C2-C1	0.543955	0.757861	0.71775	8	0.493335	0.999512	NA	0	0
sp|P36107|AUR1_YEAST	C2-C1	-0.0219632	0.256856	-0.0855079	8	0.933959	0.999512	NA	0	0
sp|P36108|DID4_YEAST	C2-C1	0.101632	0.10708	0.949124	8	0.370344	0.999512	NA	0	0
sp|P36112|FCJ1_YEAST	C2-C1	-0.0391274	0.0437868	-0.893587	8	0.397627	0.999512	NA	0	0
sp|P36114|YKR18_YEAST	C2-C1	0.00104416	0.065671	0.0158999	8	0.987704	0.999512	NA	0	0
sp|P36117|ALY1_YEAST	C2-C1	0.0483223	0.383406	0.126034	8	0.902815	0.999512	NA	0	0
sp|P36118|NTR2_YEAST	C2-C1	0.0761478	0.129113	0.589775	8	0.571618	0.999512	NA	0	0
sp|P36119|YK03_YEAST	C2-C1	-0.123492	0.281417	-0.438822	8	0.6724	0.999512	NA	0	0
sp|P36120|DBP7_YEAST	C2-C1	0.108478	0.0973254	1.11459	8	0.297387	0.999512	NA	0	0
sp|P36121|RPC5_YEAST	C2-C1	-0.349375	0.176804	-1.97606	8	0.0835571	0.999512	NA	0	0
sp|P36122|BCH2_YEAST	C2-C1	0.285119	0.803987	0.354631	8	0.732033	0.999512	NA	0	0
sp|P36123|SA190_YEAST	C2-C1	-0.0745657	0.181971	-0.409768	8	0.692729	0.999512	NA	0	0
sp|P36124|SET3_YEAST	C2-C1	-0.118411	0.390719	-0.303058	8	0.769577	0.999512	NA	0.0333333	0.0333333
sp|P36125|GMH1_YEAST	C2-C1	-2.36456	1.77469	-1.33238	8	0.219437	0.999512	NA	0	0
sp|P36126|SPO14_YEAST	C2-C1	-0.0414075	0.191056	-0.21673	8	0.833844	0.999512	NA	0	0
sp|P36130|CAF4_YEAST	C2-C1	-0.0315253	0.0777285	-0.405582	8	0.695681	0.999512	NA	0	0
sp|P36131|SPC34_YEAST	C2-C1	-0.848319	1.44129	-0.588582	8	0.57238	0.999512	NA	0	0
sp|P36132|KAE1_YEAST	C2-C1	-0.187021	0.160552	-1.16487	8	0.27763	0.999512	NA	0	0
sp|P36135|UTH1_YEAST	C2-C1	0.050499	0.124548	0.405457	8	0.695769	0.999512	NA	0	0
sp|P36136|SHB17_YEAST	C2-C1	-0.0452919	0.0434496	-1.0424	8	0.3277	0.999512	NA	0	0
sp|P36139|PET10_YEAST	C2-C1	-0.00571541	0.0571441	-0.100018	8	0.922791	0.999512	NA	0	0
sp|P36141|FMP46_YEAST	C2-C1	0.129052	0.247835	0.520718	8	0.616664	0.999512	NA	0	0
sp|P36144|RL1D1_YEAST	C2-C1	0.0121367	0.0886374	0.136926	8	0.894473	0.999512	NA	0	0
sp|P36145|T2EB_YEAST	C2-C1	0.0117899	0.130144	0.0905915	8	0.930044	0.999512	NA	0	0
sp|P36146|LAS1_YEAST	C2-C1	0.479463	1.61241	0.297358	8	0.773768	0.999512	NA	0	0
sp|P36147|PAM17_YEAST	C2-C1	0.00612965	0.263029	0.0233041	8	0.981979	0.999512	NA	0.0555556	0.0555556
sp|P36148|GPT2_YEAST	C2-C1	-0.0693091	0.0785105	-0.8828	8	0.403091	0.999512	NA	0	0
sp|P36149|BET3_YEAST	C2-C1	0.187239	0.292149	0.6409	8	0.539509	0.999512	NA	0	0
sp|P36151|YK50_YEAST	C2-C1	0.00518474	0.0970843	0.0534045	8	0.958719	0.999512	NA	0	0
sp|P36152|DRE2_YEAST	C2-C1	0.00130482	0.131629	0.00991288	8	0.992334	0.999512	NA	0	0
sp|P36154|AIM29_YEAST	C2-C1	-0.0206059	0.0965255	-0.213476	8	0.836296	0.999512	NA	0	0
sp|P36156|GTO2_YEAST	C2-C1	0.127767	0.0863271	1.48003	8	0.177133	0.999512	NA	0	0
sp|P36158|YK58_YEAST	C2-C1	1.30985	0.608385	2.153	8	0.0634778	0.999512	NA	0	0
sp|P36159|RNZ_YEAST	C2-C1	0.0434584	0.151638	0.286594	8	0.781705	0.999512	NA	0	0
sp|P36160|RPF2_YEAST	C2-C1	0.0357721	0.0859395	0.416248	8	0.688171	0.999512	NA	0	0
sp|P36161|NU133_YEAST	C2-C1	0.104562	0.0866329	1.20695	8	0.261923	0.999512	NA	0	0
sp|P36165|TGL4_YEAST	C2-C1	-0.121737	0.0630431	-1.93101	8	0.0895803	0.999512	NA	0.0208333	0.0208333
sp|P36166|PXL1_YEAST	C2-C1	0.0942619	0.44289	0.212834	8	0.83678	0.999512	NA	0	0
sp|P36168|YK76_YEAST	C2-C1	2.88442	0.706634	4.08192	8	0.00352478	0.829425	NA	0	0
sp|P36169|SKG1_YEAST	C2-C1	-0.152872	0.66953	-0.228327	8	0.82512	0.999512	NA	0	0
sp|P36224|JNM1_YEAST	C2-C1	1.3321	1.24025	1.07406	8	0.31412	0.999512	NA	0	0
sp|P36421|SYYC_YEAST	C2-C1	-0.0198025	0.0362057	-0.546943	8	0.599338	0.999512	NA	0	0
sp|P36516|RM03_YEAST	C2-C1	-0.0620144	0.144247	-0.429917	8	0.678602	0.999512	NA	0	0
sp|P36517|RM04_YEAST	C2-C1	0.16498	0.253555	0.650666	8	0.5335	0.999512	NA	0	0
sp|P36519|RM07_YEAST	C2-C1	0.231416	0.146132	1.58361	8	0.15194	0.999512	NA	0.0416667	0.0416667
sp|P36520|RM10_YEAST	C2-C1	-0.0367046	0.274973	-0.133484	8	0.897107	0.999512	NA	0	0
sp|P36521|RM11_YEAST	C2-C1	-0.0885116	0.129527	-0.683343	8	0.51369	0.999512	NA	0	0
sp|P36523|RM15_YEAST	C2-C1	0.0231702	0.200936	0.115311	8	0.91104	0.999512	NA	0	0
sp|P36525|RM24_YEAST	C2-C1	-0.057234	0.130097	-0.439934	8	0.671628	0.999512	NA	0	0
sp|P36526|RM27_YEAST	C2-C1	0.0778992	0.111499	0.698656	8	0.504567	0.999512	NA	0	0
sp|P36527|RM28_YEAST	C2-C1	-3.07799	0.703905	-4.37273	8	0.00237177	0.637838	NA	0	0
sp|P36528|RM17_YEAST	C2-C1	0.0234993	0.0574168	0.409276	8	0.693075	0.999512	NA	0.0277778	0.0277778
sp|P36531|RM36_YEAST	C2-C1	0.150293	0.33977	0.442337	8	0.66996	0.999512	NA	0	0
sp|P36532|RM37_YEAST	C2-C1	-0.286903	0.194513	-1.47498	8	0.178452	0.999512	NA	0	0
sp|P36533|RM39_YEAST	C2-C1	-0.0136629	0.247391	-0.0552279	8	0.957311	0.999512	NA	0	0
sp|P36534|RM40_YEAST	C2-C1	-0.0856694	0.689543	-0.124241	8	0.90419	0.999512	NA	0	0
sp|P36775|LONM_YEAST	C2-C1	0.0112538	0.0468231	0.240348	8	0.816105	0.999512	NA	0	0
sp|P36973|APT2_YEAST	C2-C1	-0.126742	0.177834	-0.712698	8	0.496291	0.999512	NA	0	0
sp|P37012|PGM2_YEAST	C2-C1	0.0550793	0.0598418	0.920415	8	0.38427	0.999512	NA	0	0
sp|P37020|GEF1_YEAST	C2-C1	-0.0799765	0.12964	-0.616912	8	0.554439	0.999512	NA	0	0
sp|P37254|PABS_YEAST	C2-C1	0.204624	0.261102	0.783693	8	0.455794	0.999512	NA	0	0
sp|P37262|SOL2_YEAST	C2-C1	-0.106747	0.117983	-0.904772	8	0.392018	0.999512	NA	0	0
sp|P37263|YC16_YEAST	C2-C1	-0.0187114	0.352924	-0.0530183	8	0.959017	0.999512	NA	0	0
sp|P37267|CBP4_YEAST	C2-C1	-0.425509	0.271756	-1.56578	8	0.156033	0.999512	NA	0	0
sp|P37291|GLYC_YEAST	C2-C1	-0.257978	0.147624	-1.74753	8	0.118678	0.999512	NA	0	0
sp|P37292|GLYM_YEAST	C2-C1	-0.0113732	0.0331492	-0.343091	8	0.740372	0.999512	NA	0	0
sp|P37293|NAT2_YEAST	C2-C1	-0.179133	0.260602	-0.687382	8	0.511274	0.999512	NA	0	0
sp|P37296|STV1_YEAST	C2-C1	0.120992	0.169248	0.71488	8	0.495013	0.999512	NA	0	0
sp|P37297|STT4_YEAST	C2-C1	-0.057001	0.0832568	-0.684641	8	0.512913	0.999512	NA	0.0128205	0.0128205
sp|P37298|DHSD_YEAST	C2-C1	-0.350344	0.673516	-0.520172	8	0.617028	0.999512	NA	0	0
sp|P37302|APE3_YEAST	C2-C1	-0.158069	0.0760246	-2.07919	8	0.0712053	0.999512	NA	0	0
sp|P37303|GLY1_YEAST	C2-C1	-0.0124363	0.0587777	-0.211582	8	0.837724	0.999512	NA	0.00925926	0.00925926
sp|P37304|PAM1_YEAST	C2-C1	-0.00361132	0.0438017	-0.082447	8	0.936317	0.999512	NA	0	0
sp|P37366|CCL1_YEAST	C2-C1	0.211757	0.868658	0.243775	8	0.81354	0.999512	NA	0	0
sp|P37370|VRP1_YEAST	C2-C1	-0.053646	0.0716113	-0.749128	8	0.475228	0.999512	NA	0	0
sp|P37838|NOP4_YEAST	C2-C1	-0.0400987	0.105371	-0.380549	8	0.713444	0.999512	NA	0	0
sp|P37898|AAP1_YEAST	C2-C1	-0.00672407	0.0381726	-0.176149	8	0.864554	0.999512	NA	0	0
sp|P38009|PUR92_YEAST	C2-C1	0.0210412	0.048521	0.433652	8	0.675998	0.999512	NA	0.0144928	0.0144928
sp|P38011|GBLP_YEAST	C2-C1	0.0231095	0.0966998	0.238982	8	0.817128	0.999512	NA	0	0
sp|P38013|AHP1_YEAST	C2-C1	-0.00924379	0.1105	-0.083654	8	0.935387	0.999512	NA	0	0
sp|P38041|BOB1_YEAST	C2-C1	-0.0271167	0.0286562	-0.946277	8	0.371708	0.999512	NA	0	0
sp|P38042|CDC27_YEAST	C2-C1	-0.373595	1.00385	-0.37216	8	0.719439	0.999512	NA	0	0
sp|P38061|RL32_YEAST	C2-C1	0.0255393	0.0646933	0.394775	8	0.703325	0.999512	NA	0	0
sp|P38063|KPR4_YEAST	C2-C1	-0.10465	0.078785	-1.3283	8	0.220721	0.999512	NA	0.0277778	0.0277778
sp|P38065|AP2A_YEAST	C2-C1	0.104994	0.120257	0.873081	8	0.40806	0.999512	NA	0.0333333	0.0333333
sp|P38066|RIB1_YEAST	C2-C1	-0.0396946	0.176839	-0.224468	8	0.82802	0.999512	NA	0	0
sp|P38067|UGA2_YEAST	C2-C1	0.326354	0.528031	0.618057	8	0.553721	0.999512	NA	0	0
sp|P38068|GLRX7_YEAST	C2-C1	0.015466	0.141614	0.109212	8	0.915724	0.999512	NA	0	0
sp|P38069|MNN2_YEAST	C2-C1	-0.0906596	0.0701457	-1.29245	8	0.232281	0.999512	NA	0	0
sp|P38070|YPK3_YEAST	C2-C1	-0.151719	0.0744523	-2.0378	8	0.0759322	0.999512	NA	0	0
sp|P38071|ETR1_YEAST	C2-C1	0.00741197	0.0572565	0.129452	8	0.900196	0.999512	NA	0	0
sp|P38072|SCO2_YEAST	C2-C1	-0.0190477	0.27126	-0.0702195	8	0.945743	0.999512	NA	0	0
sp|P38073|EDS1_YEAST	C2-C1	0.233451	0.14898	1.567	8	0.15575	0.999512	NA	0	0
sp|P38074|HMT1_YEAST	C2-C1	-0.0342346	0.175276	-0.195318	8	0.850014	0.999512	NA	0	0
sp|P38075|PDX3_YEAST	C2-C1	0.0153666	0.0763457	0.201276	8	0.845506	0.999512	NA	0	0
sp|P38077|ATPG_YEAST	C2-C1	-0.0123771	0.116714	-0.106046	8	0.918157	0.999512	NA	0	0
sp|P38079|YRO2_YEAST	C2-C1	-0.15093	0.097573	-1.54684	8	0.160489	0.999512	NA	0	0
sp|P38080|AKL1_YEAST	C2-C1	-0.053343	0.110346	-0.483417	8	0.641753	0.999512	NA	0	0
sp|P38081|YBQ6_YEAST	C2-C1	-0.00047555	0.0799769	-0.0059461	8	0.995401	0.999512	NA	0	0
sp|P38083|YBR3_YEAST	C2-C1	1.61126	1.38406	1.16415	8	0.277903	0.999512	NA	0	0
sp|P38084|BAP2_YEAST	C2-C1	0.0745282	0.145581	0.511935	8	0.622525	0.999512	NA	0	0
sp|P38085|TAT1_YEAST	C2-C1	-0.0215989	0.0820565	-0.26322	8	0.799034	0.999512	NA	0	0
sp|P38086|RDH54_YEAST	C2-C1	0.0901151	0.0680662	1.32393	8	0.222102	0.999512	NA	0	0
sp|P38087|YMC2_YEAST	C2-C1	0.202027	0.341848	0.590985	8	0.570846	0.999512	NA	0	0
sp|P38088|SYG_YEAST	C2-C1	-0.0361678	0.0381797	-0.947304	8	0.371216	0.999512	NA	0	0
sp|P38089|PP2C4_YEAST	C2-C1	1.8445	1.3778	1.33873	8	0.217453	0.999512	NA	0	0
sp|P38109|YBY9_YEAST	C2-C1	-0.0215834	0.136715	-0.157871	8	0.878471	0.999512	NA	0	0
sp|P38110|ATM_YEAST	C2-C1	-0.0181686	2.08559	-0.00871151	8	0.993263	0.999512	NA	0	0
sp|P38111|ATR_YEAST	C2-C1	3.15487	1.87702	1.68079	8	0.131312	0.999512	NA	0	0
sp|P38112|MAK5_YEAST	C2-C1	0.0226574	0.0889384	0.254754	8	0.80534	0.999512	NA	0	0
sp|P38113|ADH5_YEAST	C2-C1	-0.0467861	0.0699918	-0.668451	8	0.522661	0.999512	NA	0	0
sp|P38114|TBS1_YEAST	C2-C1	0.571853	1.60239	0.356875	8	0.730415	0.999512	NA	0	0
sp|P38115|ARA1_YEAST	C2-C1	0.0263915	0.0915436	0.288294	8	0.78045	0.999512	NA	0	0
sp|P38116|ARL1_YEAST	C2-C1	0.0215855	0.0486839	0.443381	8	0.669236	0.999512	NA	0	0
sp|P38120|RT09_YEAST	C2-C1	0.0265002	0.12435	0.213111	8	0.836571	0.999512	NA	0	0
sp|P38121|DPOA2_YEAST	C2-C1	-0.118141	0.117431	-1.00605	8	0.343848	0.999512	NA	0	0
sp|P38122|PANB_YEAST	C2-C1	0.173038	0.159425	1.08539	8	0.309372	0.999512	NA	0	0
sp|P38123|SWD3_YEAST	C2-C1	0.0211224	0.387369	0.0545278	8	0.957852	0.999512	NA	0	0
sp|P38127|RIM2_YEAST	C2-C1	0.2958	0.335419	0.881882	8	0.403559	0.999512	NA	0	0
sp|P38129|TAF5_YEAST	C2-C1	0.0379759	0.0748595	0.507296	8	0.625633	0.999512	NA	0	0
sp|P38130|KTR3_YEAST	C2-C1	-0.0845729	0.0426015	-1.98521	8	0.0823819	0.999512	NA	0	0
sp|P38131|KTR4_YEAST	C2-C1	0.111976	0.0742907	1.50727	8	0.170169	0.999512	NA	0	0
sp|P38132|MCM7_YEAST	C2-C1	-0.174073	0.293105	-0.593894	8	0.568991	0.999512	NA	0	0
sp|P38137|FAT2_YEAST	C2-C1	-0.0468694	0.0585398	-0.800641	8	0.446463	0.999512	NA	0	0
sp|P38138|GLU2A_YEAST	C2-C1	0.241276	0.102682	2.34974	8	0.0467004	0.999512	NA	0	0
sp|P38139|LDH1_YEAST	C2-C1	-0.0677425	0.125063	-0.541666	8	0.602803	0.999512	NA	0	0
sp|P38142|YB91_YEAST	C2-C1	0.444978	0.263711	1.68737	8	0.130013	0.999512	NA	0	0
sp|P38143|GPX2_YEAST	C2-C1	-0.00925042	0.0543183	-0.1703	8	0.869002	0.999512	NA	0	0
sp|P38144|ISW1_YEAST	C2-C1	-0.0359424	0.0185061	-1.9422	8	0.0880472	0.999512	NA	0	0
sp|P38145|RISA_YEAST	C2-C1	-0.0147636	0.0832129	-0.17742	8	0.863589	0.999512	NA	0	0
sp|P38146|YPT10_YEAST	C2-C1	-0.0221387	0.190992	-0.115915	8	0.910577	0.999512	NA	0	0
sp|P38148|PPS1_YEAST	C2-C1	-1.06239	1.18216	-0.898686	8	0.395063	0.999512	NA	0	0
sp|P38149|DUG2_YEAST	C2-C1	-0.033992	0.0689341	-0.493109	8	0.635185	0.999512	NA	0	0
sp|P38151|PBP2_YEAST	C2-C1	-0.17569	0.102333	-1.71685	8	0.124338	0.999512	NA	0	0
sp|P38152|TXTP_YEAST	C2-C1	2.42998	0.889181	2.73283	6	0.0340581	0.999512	NA	0.333333	0
sp|P38153|AP3M_YEAST	C2-C1	-0.0126132	0.11075	-0.113888	8	0.912133	0.999512	NA	0	0
sp|P38162|YBK7_YEAST	C2-C1	-0.054602	0.11306	-0.482946	8	0.642073	0.999512	NA	0	0
sp|P38164|SEA4_YEAST	C2-C1	0.0677902	0.173591	0.390517	8	0.706347	0.999512	NA	0	0
sp|P38165|RTG3_YEAST	C2-C1	-0.13677	0.608252	-0.224857	8	0.827727	0.999512	NA	0	0
sp|P38166|SFT2_YEAST	C2-C1	0.0274432	0.111547	0.246023	8	0.811859	0.999512	NA	0	0
sp|P38167|ECM21_YEAST	C2-C1	0.0955649	0.37201	0.256888	8	0.803749	0.999512	NA	0	0
sp|P38169|KMO_YEAST	C2-C1	0.0082685	0.117917	0.0701213	8	0.945818	0.999512	NA	0	0
sp|P38170|CND2_YEAST	C2-C1	-0.749151	1.26214	-0.593556	8	0.569207	0.999512	NA	0	0
sp|P38174|MAP2_YEAST	C2-C1	-0.0737836	0.0619645	-1.19074	8	0.267886	0.999512	NA	0	0
sp|P38175|RT21_YEAST	C2-C1	-0.202485	0.130271	-1.55434	8	0.158711	0.999512	NA	0	0
sp|P38177|YBI6_YEAST	C2-C1	-0.12922	0.189145	-0.683179	8	0.513789	0.999512	NA	0	0
sp|P38179|ALG3_YEAST	C2-C1	0.0363106	0.132629	0.273776	8	0.791193	0.999512	NA	0	0
sp|P38180|YBI1_YEAST	C2-C1	2.00615	2.25682	0.888925	8	0.399982	0.999512	NA	0	0
sp|P38181|NU170_YEAST	C2-C1	-0.0109879	0.057387	-0.191469	8	0.852928	0.999512	NA	0	0
sp|P38187|UBP13_YEAST	C2-C1	-0.154726	0.306538	-0.504754	8	0.627339	0.999512	NA	0.0416667	0.0416667
sp|P38193|PP4R2_YEAST	C2-C1	0.0485134	0.177277	0.273659	8	0.79128	0.999512	NA	0	0
sp|P38197|YBD6_YEAST	C2-C1	0.0417394	0.0651102	0.641058	8	0.539411	0.999512	NA	0	0
sp|P38198|STU1_YEAST	C2-C1	-0.817535	0.768209	-1.06421	8	0.318297	0.999512	NA	0.0833333	0.0833333
sp|P38199|HEK2_YEAST	C2-C1	0.0630365	0.0559809	1.12604	8	0.292793	0.999512	NA	0	0
sp|P38200|SHE1_YEAST	C2-C1	0.0352776	0.609702	0.0578604	8	0.955279	0.999512	NA	0.0833333	0.0833333
sp|P38203|LSM2_YEAST	C2-C1	-0.0684656	0.0324109	-2.11242	8	0.0676177	0.999512	NA	0	0
sp|P38205|NCL1_YEAST	C2-C1	0.0256146	0.0708494	0.361536	8	0.727062	0.999512	NA	0.0196078	0.0196078
sp|P38206|RFT1_YEAST	C2-C1	0.207546	0.785254	0.264304	8	0.798227	0.999512	NA	0	0
sp|P38207|APN2_YEAST	C2-C1	2.32837	3.21245	0.724796	8	0.489231	0.999512	NA	0	0
sp|P38208|POP8_YEAST	C2-C1	0.0479734	0.370118	0.129616	8	0.90007	0.999512	NA	0	0
sp|P38212|RCR1_YEAST	C2-C1	-1.01054	1.00897	-1.00156	7	0.349913	0.999512	NA	0	0
sp|P38213|DSF2_YEAST	C2-C1	-0.850922	0.278851	-3.05152	8	0.0157844	0.999512	NA	0	0
sp|P38217|IMB2_YEAST	C2-C1	-0.0194072	0.070955	-0.273514	8	0.791387	0.999512	NA	0	0
sp|P38218|POA1_YEAST	C2-C1	-0.444581	0.363836	-1.22193	8	0.256516	0.999512	NA	0	0
sp|P38219|OLA1_YEAST	C2-C1	-0.00678569	0.0408451	-0.166132	8	0.872175	0.999512	NA	0	0
sp|P38221|CDS1_YEAST	C2-C1	-0.077215	0.105773	-0.730004	8	0.486211	0.999512	NA	0	0
sp|P38222|RKM3_YEAST	C2-C1	-0.271437	0.204158	-1.32955	8	0.220328	0.999512	NA	0	0
sp|P38225|FAT1_YEAST	C2-C1	-0.0287849	0.0522573	-0.550829	8	0.596793	0.999512	NA	0	0
sp|P38226|CST26_YEAST	C2-C1	-0.193965	0.110006	-1.76323	8	0.115876	0.999512	NA	0	0
sp|P38228|TCM62_YEAST	C2-C1	0.0284513	0.201677	0.141073	8	0.8913	0.999512	NA	0	0
sp|P38230|QOR_YEAST	C2-C1	-0.0185272	0.0746036	-0.248342	8	0.810126	0.999512	NA	0	0
sp|P38234|RFS1_YEAST	C2-C1	0.0112278	0.0705787	0.159082	8	0.877547	0.999512	NA	0.0333333	0.0333333
sp|P38235|YBQ3_YEAST	C2-C1	-0.0593861	0.0654713	-0.907055	8	0.39088	0.999512	NA	0	0
sp|P38236|MUM2_YEAST	C2-C1	0.731701	1.96082	0.373161	8	0.718723	0.999512	NA	0	0
sp|P38237|UBP14_YEAST	C2-C1	0.221676	0.11734	1.88918	8	0.0955472	0.999512	NA	0.0333333	0.0333333
sp|P38238|TRM7_YEAST	C2-C1	0.141467	0.110553	1.27963	8	0.236537	0.999512	NA	0	0
sp|P38239|YBR2_YEAST	C2-C1	-0.0514479	0.684507	-0.0751605	8	0.941932	0.999512	NA	0	0
sp|P38241|SLT11_YEAST	C2-C1	-0.0479162	0.0616921	-0.776699	8	0.459683	0.999512	NA	0	0
sp|P38242|ALG14_YEAST	C2-C1	-0.0943481	0.0924587	-1.02044	8	0.337386	0.999512	NA	0	0
sp|P38244|M28P1_YEAST	C2-C1	0.0118319	0.164772	0.0718078	8	0.944518	0.999512	NA	0	0
sp|P38247|SLM4_YEAST	C2-C1	-0.133002	0.157246	-0.845821	8	0.422229	0.999512	NA	0	0
sp|P38248|ECM33_YEAST	C2-C1	-0.350268	0.233414	-1.50063	8	0.171843	0.999512	NA	0	0
sp|P38249|EIF3A_YEAST	C2-C1	-0.0134699	0.0314318	-0.428543	8	0.679561	0.999512	NA	0	0
sp|P38250|IST2_YEAST	C2-C1	0.0459617	0.104414	0.440188	8	0.671452	0.999512	NA	0	0
sp|P38251|RFC5_YEAST	C2-C1	0.103999	0.0917997	1.13289	8	0.290071	0.999512	NA	0	0
sp|P38254|TTL_YEAST	C2-C1	-0.0550747	0.0473772	-1.16247	8	0.278546	0.999512	NA	0	0
sp|P38255|RXT2_YEAST	C2-C1	-0.0176066	0.136003	-0.129457	8	0.900192	0.999512	NA	0	0
sp|P38256|YBU6_YEAST	C2-C1	0.209349	0.157134	1.3323	8	0.219463	0.999512	NA	0	0
sp|P38260|FES1_YEAST	C2-C1	0.00151862	0.0634069	0.0239504	8	0.981479	0.999512	NA	0	0
sp|P38261|EXO84_YEAST	C2-C1	-0.0248505	0.175708	-0.14143	8	0.891027	0.999512	NA	0	0
sp|P38262|SIF2_YEAST	C2-C1	0.0800035	0.482432	0.165834	8	0.872402	0.999512	NA	0	0
sp|P38264|PHO88_YEAST	C2-C1	-0.0344014	0.109211	-0.315	8	0.760821	0.999512	NA	0	0
sp|P38266|AIM3_YEAST	C2-C1	-0.487366	0.472566	-1.03132	8	0.33256	0.999512	NA	0	0
sp|P38271|OPY1_YEAST	C2-C1	-0.0464034	0.372422	-0.124599	8	0.903915	0.999512	NA	0	0
sp|P38272|SHE3_YEAST	C2-C1	0.105238	0.0691526	1.52183	8	0.166548	0.999512	NA	0	0
sp|P38274|HSL7_YEAST	C2-C1	0.339936	0.154353	2.20232	8	0.0587809	0.999512	NA	0	0
sp|P38276|YBY7_YEAST	C2-C1	0.0896041	0.158255	0.566202	8	0.586784	0.999512	NA	0	0
sp|P38281|APD1_YEAST	C2-C1	-0.0509247	0.0685402	-0.74299	8	0.478735	0.999512	NA	0	0
sp|P38283|SLI15_YEAST	C2-C1	0.239593	0.930936	0.257368	8	0.803391	0.999512	NA	0	0
sp|P38285|AMN1_YEAST	C2-C1	1.3061	0.757132	1.72506	8	0.122798	0.999512	NA	0	0
sp|P38286|MKAR_YEAST	C2-C1	-0.0668332	0.154836	-0.431639	8	0.6774	0.999512	NA	0	0
sp|P38288|TOS1_YEAST	C2-C1	0.0459509	0.257859	0.178201	8	0.862995	0.999512	NA	0	0
sp|P38293|UMP1_YEAST	C2-C1	2.90716	2.19243	1.326	8	0.221448	0.999512	NA	0	0
sp|P38295|MCFS2_YEAST	C2-C1	0.0285908	0.100392	0.284792	8	0.783037	0.999512	NA	0	0
sp|P38297|FZO1_YEAST	C2-C1	0.0221035	0.263219	0.0839736	8	0.935141	0.999512	NA	0.0416667	0.0416667
sp|P38300|MBA1_YEAST	C2-C1	-0.0548681	0.102021	-0.537815	8	0.605339	0.999512	NA	0	0
sp|P38301|GDT1_YEAST	C2-C1	-0.115581	0.252175	-0.458337	8	0.658904	0.999512	NA	0	0
sp|P38306|YB47_YEAST	C2-C1	0.0439268	0.12042	0.36478	8	0.72473	0.999512	NA	0	0
sp|P38310|FTH1_YEAST	C2-C1	-0.951331	0.871142	-1.09205	8	0.306604	0.999512	NA	0	0
sp|P38311|YB59_YEAST	C2-C1	-1.14434	0.849273	-1.34744	8	0.214756	0.999512	NA	0	0
sp|P38314|SDS24_YEAST	C2-C1	-0.00152375	0.0930265	-0.0163797	8	0.987333	0.999512	NA	0	0
sp|P38315|YBP1_YEAST	C2-C1	-0.20564	0.16385	-1.25505	8	0.244881	0.999512	NA	0	0
sp|P38321|YB75_YEAST	C2-C1	-0.000561705	0.418885	-0.00134095	8	0.998963	0.999533	NA	0	0
sp|P38323|MCX1_YEAST	C2-C1	-0.0343411	0.0972422	-0.353151	8	0.7331	0.999512	NA	0	0
sp|P38325|OM14_YEAST	C2-C1	0.280732	0.278865	1.00669	8	0.343557	0.999512	NA	0	0
sp|P38328|ARPC1_YEAST	C2-C1	-0.0347511	0.0623108	-0.557705	8	0.592305	0.999512	NA	0.0151515	0.0151515
sp|P38330|RMD9L_YEAST	C2-C1	-0.186089	0.449582	-0.413914	8	0.689811	0.999512	NA	0	0
sp|P38331|YB92_YEAST	C2-C1	-0.169893	0.146329	-1.16103	8	0.279098	0.999512	NA	0	0
sp|P38332|DPH7_YEAST	C2-C1	-0.212663	0.30701	-0.692691	8	0.508109	0.999512	NA	0	0
sp|P38333|ENP1_YEAST	C2-C1	-0.0119831	0.0565475	-0.211912	8	0.837475	0.999512	NA	0	0
sp|P38334|TRS20_YEAST	C2-C1	-0.679558	0.369084	-1.8412	8	0.102856	0.999512	NA	0	0
sp|P38335|MTC4_YEAST	C2-C1	0.458694	0.860287	0.533187	8	0.608394	0.999512	NA	0	0
sp|P38336|POP4_YEAST	C2-C1	-0.0108784	0.895089	-0.0121534	8	0.990601	0.999512	NA	0	0
sp|P38339|RGD1_YEAST	C2-C1	0.0350955	0.0883144	0.397393	8	0.70147	0.999512	NA	0	0
sp|P38340|NTM1_YEAST	C2-C1	-0.003123	0.0683514	-0.0456904	8	0.964677	0.999512	NA	0	0
sp|P38341|AIM5_YEAST	C2-C1	-1.26285	2.20368	-0.573061	8	0.582348	0.999512	NA	0	0
sp|P38342|TSC10_YEAST	C2-C1	0.0248448	0.0908939	0.273338	8	0.791517	0.999512	NA	0	0
sp|P38344|REI1_YEAST	C2-C1	-0.0844784	0.0917517	-0.920729	8	0.384116	0.999512	NA	0	0
sp|P38345|FMP21_YEAST	C2-C1	-0.0770437	0.185235	-0.415925	8	0.688398	0.999512	NA	0	0
sp|P38347|YB9P_YEAST	C2-C1	-0.119036	0.152492	-0.780605	8	0.457508	0.999512	NA	0	0
sp|P38348|HSM3_YEAST	C2-C1	0.0659126	0.171689	0.383906	8	0.71105	0.999512	NA	0	0
sp|P38349|UBX7_YEAST	C2-C1	0.0917229	0.0915681	1.00169	8	0.345824	0.999512	NA	0	0
sp|P38351|PAF1_YEAST	C2-C1	0.0186961	0.138169	0.135313	8	0.895707	0.999512	NA	0	0
sp|P38353|SSH1_YEAST	C2-C1	0.0188616	0.0366945	0.514017	8	0.621133	0.999512	NA	0	0
sp|P38355|YB8B_YEAST	C2-C1	0.126781	0.162979	0.777899	8	0.459014	0.999512	NA	0	0
sp|P38356|BSD2_YEAST	C2-C1	1.12714	0.713847	1.57897	8	0.152996	0.999512	NA	0	0
sp|P38359|SUL1_YEAST	C2-C1	0.0345648	0.139913	0.247044	8	0.811096	0.999512	NA	0	0
sp|P38426|TPS3_YEAST	C2-C1	-0.0608767	0.0547468	-1.11197	8	0.298449	0.999512	NA	0	0
sp|P38427|TSL1_YEAST	C2-C1	-0.00139108	0.0332692	-0.0418128	8	0.967673	0.999512	NA	0	0
sp|P38428|CUE1_YEAST	C2-C1	-0.549908	1.72068	-0.319589	8	0.757466	0.999512	NA	0	0
sp|P38429|SAP30_YEAST	C2-C1	-0.063656	0.308792	-0.206145	8	0.841827	0.999512	NA	0	0
sp|P38430|YM8C_YEAST	C2-C1	3.03893	3.42243	0.887944	8	0.400479	0.999512	NA	0	0
sp|P38431|IF5_YEAST	C2-C1	-0.0124498	0.0565327	-0.220223	8	0.831213	0.999512	NA	0	0
sp|P38439|LEO1_YEAST	C2-C1	-0.0587502	0.125967	-0.466394	8	0.65337	0.999512	NA	0	0
sp|P38523|GRPE_YEAST	C2-C1	-0.0732219	0.0983717	-0.744339	8	0.477963	0.999512	NA	0	0
sp|P38555|YPT31_YEAST	C2-C1	0.0774732	0.113425	0.683033	8	0.513876	0.999512	NA	0	0
sp|P38590|MSG5_YEAST	C2-C1	-1.20607	0.905968	-1.33125	8	0.219794	0.999512	NA	0	0
sp|P38604|ERG7_YEAST	C2-C1	-0.15591	0.172606	-0.903268	8	0.392769	0.999512	NA	0.0333333	0.0333333
sp|P38615|RIM11_YEAST	C2-C1	-0.0816954	0.126619	-0.645207	8	0.536854	0.999512	NA	0.0555556	0.0555556
sp|P38616|YGP1_YEAST	C2-C1	-0.171155	0.160567	-1.06594	8	0.317561	0.999512	NA	0	0
sp|P38620|KPR2_YEAST	C2-C1	0.0121001	0.0559728	0.216179	8	0.834259	0.999512	NA	0	0
sp|P38623|RCK2_YEAST	C2-C1	-0.107223	0.0451141	-2.37671	8	0.0447749	0.999512	NA	0.0138889	0.0138889
sp|P38624|PSB1_YEAST	C2-C1	-0.0202048	0.0381613	-0.529457	8	0.610861	0.999512	NA	0	0
sp|P38625|GUAA_YEAST	C2-C1	0.02405	0.083374	0.288459	8	0.780328	0.999512	NA	0	0
sp|P38626|NCB5R_YEAST	C2-C1	-0.0420771	0.0574696	-0.732164	8	0.484963	0.999512	NA	0	0
sp|P38627|URA8_YEAST	C2-C1	-0.00902343	0.0604641	-0.149236	8	0.885061	0.999512	NA	0	0
sp|P38628|AGM1_YEAST	C2-C1	0.0273093	0.0941288	0.290127	8	0.779097	0.999512	NA	0	0
sp|P38629|RFC3_YEAST	C2-C1	-0.0665298	0.132466	-0.502239	8	0.629029	0.999512	NA	0	0
sp|P38630|RFC1_YEAST	C2-C1	0.0278943	0.066895	0.416985	8	0.687653	0.999512	NA	0.0104167	0.0104167
sp|P38631|FKS1_YEAST	C2-C1	0.00110265	0.0599631	0.0183889	8	0.985779	0.999512	NA	0	0
sp|P38633|MED31_YEAST	C2-C1	0.0666364	1.37127	0.0485947	8	0.962434	0.999512	NA	0	0
sp|P38635|HIS9_YEAST	C2-C1	0.0751731	0.0603456	1.24571	8	0.248116	0.999512	NA	0	0
sp|P38636|ATX1_YEAST	C2-C1	-0.233251	0.23973	-0.972973	8	0.359063	0.999512	NA	0	0
sp|P38682|GLO3_YEAST	C2-C1	-0.148319	0.0871466	-1.70195	8	0.127177	0.999512	NA	0	0
sp|P38687|SRP68_YEAST	C2-C1	0.0546776	0.0852395	0.641458	8	0.539164	0.999512	NA	0	0
sp|P38688|SRP72_YEAST	C2-C1	-0.0044374	0.0708631	-0.0626193	8	0.951606	0.999512	NA	0	0
sp|P38689|KPR3_YEAST	C2-C1	-0.0639435	0.0595474	-1.07383	8	0.314219	0.999512	NA	0	0
sp|P38691|KSP1_YEAST	C2-C1	0.111437	0.278968	0.399462	8	0.700005	0.999512	NA	0	0
sp|P38692|KIC1_YEAST	C2-C1	-0.296779	0.254299	-1.16705	8	0.276798	0.999512	NA	0	0
sp|P38694|MSC7_YEAST	C2-C1	-0.019003	0.0405842	-0.468235	8	0.652109	0.999512	NA	0	0
sp|P38697|IMDH2_YEAST	C2-C1	-0.0231911	0.111271	-0.20842	8	0.84011	0.999512	NA	0	0
sp|P38698|PPX1_YEAST	C2-C1	0.0455204	0.0585554	0.777389	8	0.459298	0.999512	NA	0	0
sp|P38701|RS20_YEAST	C2-C1	-0.154075	0.0458606	-3.35964	8	0.00993705	0.999512	NA	0	0
sp|P38703|LAG1_YEAST	C2-C1	0.138641	0.133347	1.0397	8	0.328878	0.999512	NA	0	0
sp|P38707|SYNC_YEAST	C2-C1	-0.00449896	0.0505117	-0.0890678	8	0.931217	0.999512	NA	0	0
sp|P38708|YHI0_YEAST	C2-C1	-0.0386105	0.0460355	-0.838712	8	0.42598	0.999512	NA	0	0
sp|P38710|INM1_YEAST	C2-C1	0.142944	0.0986179	1.44947	8	0.185247	0.999512	NA	0	0
sp|P38712|RRP3_YEAST	C2-C1	-0.0796977	0.0633512	-1.25803	8	0.243856	0.999512	NA	0	0
sp|P38713|OSH3_YEAST	C2-C1	0.0183657	0.0531057	0.345833	8	0.738386	0.999512	NA	0	0
sp|P38715|GRE3_YEAST	C2-C1	0.035708	0.0887829	0.402195	8	0.698073	0.999512	NA	0	0
sp|P38716|YHR2_YEAST	C2-C1	-0.331645	0.229148	-1.4473	8	0.185837	0.999512	NA	0	0
sp|P38717|SIP3_YEAST	C2-C1	0.241159	1.07236	0.224885	8	0.827706	0.999512	NA	0	0
sp|P38719|DBP8_YEAST	C2-C1	-0.0126723	0.236906	-0.0534907	8	0.958653	0.999512	NA	0	0
sp|P38720|6PGD1_YEAST	C2-C1	0.00210961	0.0978729	0.0215546	8	0.983331	0.999512	NA	0	0
sp|P38732|EFM1_YEAST	C2-C1	-0.0362756	0.0859832	-0.421891	8	0.684213	0.999512	NA	0.0151515	0.0151515
sp|P38735|VMR1_YEAST	C2-C1	0.834851	0.851844	0.980051	8	0.355765	0.999512	NA	0	0
sp|P38736|GOSR1_YEAST	C2-C1	-0.170141	0.135849	-1.25243	8	0.245786	0.999512	NA	0	0
sp|P38737|ECM29_YEAST	C2-C1	-0.0143519	0.0463195	-0.309845	8	0.764596	0.999512	NA	0	0
sp|P38742|NPR3_YEAST	C2-C1	0.528808	0.947666	0.55801	8	0.592106	0.999512	NA	0	0
sp|P38745|YHB7_YEAST	C2-C1	0.161734	0.228464	0.707919	8	0.499098	0.999512	NA	0	0
sp|P38746|YLF2_YEAST	C2-C1	0.0685562	0.2616	0.262065	8	0.799893	0.999512	NA	0	0
sp|P38747|OTU2_YEAST	C2-C1	-0.141127	0.233238	-0.605077	8	0.561895	0.999512	NA	0	0
sp|P38748|ETP1_YEAST	C2-C1	-0.120532	0.523452	-0.230264	8	0.823666	0.999512	NA	0	0
sp|P38749|YAP3_YEAST	C2-C1	0.0580162	0.062106	0.934148	8	0.377562	0.999512	NA	0	0
sp|P38753|HSE1_YEAST	C2-C1	-0.0732492	0.123999	-0.590727	8	0.571011	0.999512	NA	0	0
sp|P38754|RL14B_YEAST	C2-C1	-0.441426	0.313129	-1.40972	8	0.196291	0.999512	NA	0	0
sp|P38755|OSH7_YEAST	C2-C1	0.0356645	0.0850816	0.41918	8	0.686114	0.999512	NA	0	0
sp|P38756|YHG3_YEAST	C2-C1	0.00806734	0.0917848	0.0878941	8	0.932121	0.999512	NA	0	0
sp|P38758|TDA3_YEAST	C2-C1	-0.0460227	0.0954148	-0.482343	8	0.642483	0.999512	NA	0.0151515	0.0151515
sp|P38759|VPS29_YEAST	C2-C1	-0.000332044	0.0447147	-0.00742584	8	0.994257	0.999512	NA	0	0
sp|P38764|RPN1_YEAST	C2-C1	0.0357322	0.0517301	0.690742	8	0.509269	0.999512	NA	0	0
sp|P38765|YHI9_YEAST	C2-C1	-0.00183752	0.0843682	-0.0217797	8	0.983157	0.999512	NA	0	0
sp|P38767|ERC1_YEAST	C2-C1	0.703025	0.701892	1.00161	8	0.34586	0.999512	NA	0	0
sp|P38768|PIH1_YEAST	C2-C1	0.131338	0.0874123	1.50251	8	0.171369	0.999512	NA	0	0
sp|P38769|YHJ5_YEAST	C2-C1	0.375944	0.443968	0.846783	8	0.421723	0.999512	NA	0	0
sp|P38770|BRL1_YEAST	C2-C1	-0.375095	0.252646	-1.48467	8	0.17593	0.999512	NA	0	0
sp|P38771|RRF1_YEAST	C2-C1	-0.8165	0.604899	-1.34981	8	0.214025	0.999512	NA	0	0
sp|P38772|BCD1_YEAST	C2-C1	-0.359635	0.26332	-1.36577	8	0.20917	0.999512	NA	0	0
sp|P38773|DOG2_YEAST	C2-C1	-0.264825	0.308493	-0.858448	8	0.415623	0.999512	NA	0	0
sp|P38775|YHK5_YEAST	C2-C1	0.116086	0.156854	0.740091	8	0.480398	0.999512	NA	0	0
sp|P38777|FSH1_YEAST	C2-C1	-0.0827554	0.0492752	-1.67945	8	0.131577	0.999512	NA	0	0
sp|P38779|CIC1_YEAST	C2-C1	0.151659	0.105017	1.44413	8	0.186698	0.999512	NA	0	0
sp|P38781|RSC30_YEAST	C2-C1	0.0632732	0.24708	0.256084	8	0.804348	0.999512	NA	0	0
sp|P38782|MED6_YEAST	C2-C1	-0.123087	0.131436	-0.936477	8	0.376432	0.999512	NA	0	0
sp|P38784|VMA22_YEAST	C2-C1	0.00540923	0.0762888	0.0709046	8	0.945214	0.999512	NA	0	0
sp|P38786|RPP1_YEAST	C2-C1	-0.00462598	0.0891767	-0.0518743	8	0.959901	0.999512	NA	0	0
sp|P38787|PANE_YEAST	C2-C1	-0.00637216	0.0761432	-0.0836866	8	0.935362	0.999512	NA	0	0
sp|P38788|SSZ1_YEAST	C2-C1	0.0674321	0.0328254	2.05427	8	0.0740161	0.999512	NA	0	0
sp|P38791|DHYS_YEAST	C2-C1	0.0616638	0.0624058	0.988109	8	0.352039	0.999512	NA	0	0
sp|P38792|RRP4_YEAST	C2-C1	-0.182162	0.182493	-0.998184	8	0.347421	0.999512	NA	0	0
sp|P38793|TRM5_YEAST	C2-C1	0.120304	0.0744587	1.61571	8	0.144819	0.999512	NA	0	0
sp|P38795|NADE_YEAST	C2-C1	-0.0605309	0.0984634	-0.614755	8	0.555794	0.999512	NA	0	0
sp|P38796|PPME1_YEAST	C2-C1	-1.78524	1.22938	-1.45215	8	0.184524	0.999512	NA	0	0
sp|P38797|PP2C7_YEAST	C2-C1	0.000423983	0.123975	0.0034199	8	0.997355	0.999512	NA	0	0
sp|P38798|NMD2_YEAST	C2-C1	0.0696048	0.0893198	0.779276	8	0.458247	0.999512	NA	0	0
sp|P38799|YHN8_YEAST	C2-C1	0.312656	0.36996	0.845106	8	0.422605	0.999512	NA	0	0
sp|P38801|LRP1_YEAST	C2-C1	0.112917	0.146819	0.769093	8	0.463937	0.999512	NA	0	0
sp|P38803|IPI1_YEAST	C2-C1	0.12209	0.128127	0.95288	8	0.36855	0.999512	NA	0	0
sp|P38804|SDO1L_YEAST	C2-C1	-0.127118	0.173672	-0.731943	8	0.48509	0.999512	NA	0	0
sp|P38805|RPF1_YEAST	C2-C1	0.0346023	0.114477	0.302265	8	0.77016	0.999512	NA	0	0
sp|P38809|YHP7_YEAST	C2-C1	-0.100813	0.129865	-0.776286	8	0.459913	0.999512	NA	0	0
sp|P38810|SFB3_YEAST	C2-C1	-0.0586943	0.044302	-1.32487	8	0.221806	0.999512	NA	0	0
sp|P38811|TRA1_YEAST	C2-C1	0.038467	0.0414617	0.927772	8	0.380666	0.999512	NA	0.00574713	0.00574713
sp|P38812|GEP4_YEAST	C2-C1	-0.0528127	0.30346	-0.174035	8	0.866161	0.999512	NA	0	0
sp|P38813|BIG1_YEAST	C2-C1	0.374605	0.194422	1.92677	8	0.0901694	0.999512	NA	0	0
sp|P38814|SBE22_YEAST	C2-C1	0.0769569	0.253621	0.303433	8	0.769301	0.999512	NA	0	0
sp|P38816|TRXB2_YEAST	C2-C1	-0.0530469	0.122849	-0.431806	8	0.677284	0.999512	NA	0	0
sp|P38817|GGA2_YEAST	C2-C1	0.0411876	0.0766603	0.537275	8	0.605695	0.999512	NA	0	0
sp|P38818|CTM1_YEAST	C2-C1	-0.330622	0.465504	-0.710245	8	0.49773	0.999512	NA	0.111111	0.111111
sp|P38819|ERP5_YEAST	C2-C1	0.121989	0.292263	0.417395	8	0.687366	0.999512	NA	0	0
sp|P38820|UBA4_YEAST	C2-C1	-0.325798	0.0607028	-5.3671	8	0.000671932	0.210819	NA	0	0
sp|P38821|DNPEP_YEAST	C2-C1	-0.0704622	0.0338767	-2.07996	8	0.0711193	0.999512	NA	0	0
sp|P38822|BZZ1_YEAST	C2-C1	-0.0267437	0.0632654	-0.422723	8	0.68363	0.999512	NA	0	0
sp|P38823|DMA1_YEAST	C2-C1	1.01339	0.70427	1.43892	8	0.188123	0.999512	NA	0	0
sp|P38825|TOM71_YEAST	C2-C1	0.0356111	0.0607755	0.585945	8	0.574067	0.999512	NA	0	0
sp|P38826|ORC6_YEAST	C2-C1	0.0606753	0.990793	0.0612391	8	0.952671	0.999512	NA	0	0
sp|P38827|SET1_YEAST	C2-C1	-0.726092	0.406358	-1.78683	8	0.11178	0.999512	NA	0	0
sp|P38828|LSM12_YEAST	C2-C1	-0.00304027	0.0882932	-0.0344338	8	0.973375	0.999512	NA	0	0
sp|P38829|YHS2_YEAST	C2-C1	0.113279	0.225393	0.502585	8	0.628797	0.999512	NA	0	0
sp|P38833|YHS7_YEAST	C2-C1	-0.00189989	0.28884	-0.00657763	8	0.994913	0.999512	NA	0	0
sp|P38836|ECM14_YEAST	C2-C1	-0.12081	0.179872	-0.671643	8	0.52073	0.999512	NA	0	0
sp|P38837|NSG1_YEAST	C2-C1	-0.136345	0.0944221	-1.444	8	0.186736	0.999512	NA	0	0
sp|P38839|SPL2_YEAST	C2-C1	0.261704	1.3586	0.192627	8	0.852051	0.999512	NA	0	0
sp|P38840|ARO9_YEAST	C2-C1	0.0281362	0.070725	0.397826	8	0.701163	0.999512	NA	0.025	0.0166667
sp|P38843|CHS7_YEAST	C2-C1	-1.50461	1.17686	-1.27849	8	0.236918	0.999512	NA	0	0
sp|P38845|CRP1_YEAST	C2-C1	-0.0820891	0.0659458	-1.2448	8	0.248434	0.999512	NA	0	0
sp|P38850|RT107_YEAST	C2-C1	0.0138604	0.0938468	0.147692	8	0.88624	0.999512	NA	0	0
sp|P38851|YSP1_YEAST	C2-C1	-0.51764	1.01666	-0.509156	8	0.624386	0.999512	NA	0	0
sp|P38853|KEL1_YEAST	C2-C1	-0.100752	0.0936938	-1.07533	8	0.313583	0.999512	NA	0	0
sp|P38854|TDA11_YEAST	C2-C1	-0.488234	0.234547	-2.0816	8	0.0709382	0.999512	NA	0	0
sp|P38858|SOL3_YEAST	C2-C1	-0.0175302	0.050578	-0.346598	8	0.737834	0.999512	NA	0	0
sp|P38859|DNA2_YEAST	C2-C1	-0.347074	0.157376	-2.20539	8	0.0585005	0.999512	NA	0	0
sp|P38860|MTG2_YEAST	C2-C1	-0.292089	0.212126	-1.37696	8	0.205823	0.999512	NA	0	0
sp|P38861|NMD3_YEAST	C2-C1	-0.074284	0.0678449	-1.09491	8	0.305422	0.999512	NA	0	0
sp|P38862|ATG7_YEAST	C2-C1	-0.457202	0.420618	-1.08698	8	0.30871	0.999512	NA	0	0
sp|P38863|SPC97_YEAST	C2-C1	0.561169	0.748967	0.749257	8	0.475154	0.999512	NA	0	0
sp|P38867|YHX7_YEAST	C2-C1	0.117502	0.220428	0.533066	8	0.608474	0.999512	NA	0	0
sp|P38869|SVP26_YEAST	C2-C1	0.0458312	0.143362	0.31969	8	0.757393	0.999512	NA	0	0
sp|P38870|YHY2_YEAST	C2-C1	0.132379	1.30258	0.101628	8	0.921553	0.999512	NA	0	0
sp|P38871|SSP1_YEAST	C2-C1	0.867285	0.568361	1.52594	8	0.165538	0.999512	NA	0	0
sp|P38873|KOG1_YEAST	C2-C1	-0.0910553	0.123733	-0.735901	8	0.482807	0.999512	NA	0	0
sp|P38874|ELP5_YEAST	C2-C1	-0.0157892	0.181622	-0.0869342	8	0.93286	0.999512	NA	0	0
sp|P38875|GPI16_YEAST	C2-C1	0.122015	0.106177	1.14917	8	0.283681	0.999512	NA	0	0
sp|P38878|LNP_YEAST	C2-C1	-0.0691205	0.146117	-0.473047	8	0.648817	0.999512	NA	0	0
sp|P38879|NACA_YEAST	C2-C1	-0.0422621	0.0848575	-0.498035	8	0.63186	0.999512	NA	0	0
sp|P38882|UTP9_YEAST	C2-C1	-0.0531483	0.0578642	-0.918501	8	0.385213	0.999512	NA	0.0119048	0.0119048
sp|P38883|RIX1_YEAST	C2-C1	0.0680866	0.0687002	0.991069	8	0.350677	0.999512	NA	0.0185185	0.0185185
sp|P38884|AIM18_YEAST	C2-C1	0.0478158	0.251883	0.189833	8	0.854168	0.999512	NA	0	0
sp|P38885|AIM46_YEAST	C2-C1	0.0732458	0.0714962	1.02447	8	0.33559	0.999512	NA	0	0
sp|P38886|RPN10_YEAST	C2-C1	-0.105471	0.0582895	-1.80944	8	0.107984	0.999512	NA	0	0
sp|P38887|YH02_YEAST	C2-C1	-0.154854	0.072553	-2.13436	8	0.0653478	0.999512	NA	0	0
sp|P38889|SKN7_YEAST	C2-C1	-0.186062	0.331972	-0.560476	8	0.590501	0.999512	NA	0	0
sp|P38890|SET5_YEAST	C2-C1	0.0027166	0.116997	0.0232194	8	0.982044	0.999512	NA	0	0
sp|P38891|BCA1_YEAST	C2-C1	0.0678316	0.0932305	0.727569	8	0.487621	0.999512	NA	0	0
sp|P38902|RPB11_YEAST	C2-C1	-0.00405417	0.0829228	-0.0488909	8	0.962205	0.999512	NA	0	0
sp|P38903|2A5D_YEAST	C2-C1	-0.103443	0.0526287	-1.96553	8	0.0849287	0.999512	NA	0	0
sp|P38904|SPP41_YEAST	C2-C1	0.0732483	0.093898	0.780083	8	0.457798	0.999512	NA	0	0
sp|P38909|CYC2_YEAST	C2-C1	-2.89999	1.89647	-1.52915	5	0.186774	0.999512	NA	0.333333	0
sp|P38910|CH10_YEAST	C2-C1	-0.0705616	0.0883	-0.799112	8	0.447299	0.999512	NA	0	0
sp|P38911|FKBP3_YEAST	C2-C1	-0.00275789	0.0853704	-0.032305	8	0.97502	0.999512	NA	0	0
sp|P38912|IF1A_YEAST	C2-C1	-0.259608	0.23991	-1.0821	8	0.310742	0.999512	NA	0	0
sp|P38915|SPT8_YEAST	C2-C1	-0.00656558	0.18624	-0.0352534	8	0.972741	0.999512	NA	0	0
sp|P38920|MLH1_YEAST	C2-C1	-0.128108	0.0852727	-1.50234	8	0.171412	0.999512	NA	0	0
sp|P38922|HRB1_YEAST	C2-C1	-0.0180322	0.0943613	-0.191098	8	0.85321	0.999512	NA	0	0
sp|P38928|AXL2_YEAST	C2-C1	0.292659	0.239735	1.22076	8	0.256934	0.999512	NA	0	0
sp|P38929|ATC2_YEAST	C2-C1	0.0841878	0.069942	1.20368	8	0.263118	0.999512	NA	0	0
sp|P38930|CSK2C_YEAST	C2-C1	0.0327519	0.362005	0.0904735	8	0.930135	0.999512	NA	0	0
sp|P38931|SSN2_YEAST	C2-C1	1.19913	1.03895	1.15418	8	0.281738	0.999512	NA	0	0
sp|P38932|VPS45_YEAST	C2-C1	-0.0266814	0.18193	-0.146657	8	0.887031	0.999512	NA	0	0
sp|P38934|BFR1_YEAST	C2-C1	-0.028132	0.106817	-0.263366	8	0.798925	0.999512	NA	0	0
sp|P38954|IPT1_YEAST	C2-C1	-0.347762	1.90525	-0.182528	8	0.859709	0.999512	NA	0	0
sp|P38959|VPS41_YEAST	C2-C1	0.0518833	0.296122	0.175209	8	0.865268	0.999512	NA	0	0
sp|P38961|RRP8_YEAST	C2-C1	0.0949149	0.106131	0.894318	8	0.397259	0.999512	NA	0	0
sp|P38962|TVP23_YEAST	C2-C1	0.0342027	0.150086	0.227888	8	0.82545	0.999512	NA	0	0
sp|P38966|YD089_YEAST	C2-C1	0.0787856	0.0854963	0.921509	8	0.383733	0.999512	NA	0	0
sp|P38968|SEC31_YEAST	C2-C1	0.0184851	0.0316628	0.583812	8	0.575434	0.999512	NA	0	0
sp|P38969|PNT1_YEAST	C2-C1	0.527615	1.39068	0.379392	8	0.714269	0.999512	NA	0	0
sp|P38970|HAL5_YEAST	C2-C1	0.110981	0.074775	1.4842	8	0.176052	0.999512	NA	0	0
sp|P38972|PUR4_YEAST	C2-C1	-0.00883099	0.0556304	-0.158744	8	0.877805	0.999512	NA	0	0
sp|P38985|SRP14_YEAST	C2-C1	0.0589835	0.0471081	1.25209	8	0.245904	0.999512	NA	0	0
sp|P38986|ASPG1_YEAST	C2-C1	-0.0115498	0.0762486	-0.151476	8	0.883351	0.999512	NA	0	0
sp|P38987|TEM1_YEAST	C2-C1	-1.25992	1.10074	-1.14461	8	0.285458	0.999512	NA	0	0
sp|P38988|GGC1_YEAST	C2-C1	0.00660486	0.121945	0.0541627	8	0.958134	0.999512	NA	0	0
sp|P38989|SMC2_YEAST	C2-C1	0.0559581	1.49425	0.037449	8	0.971045	0.999512	NA	0	0
sp|P38990|SAK1_YEAST	C2-C1	0.461434	1.09834	0.42012	8	0.685455	0.999512	NA	0	0
sp|P38992|SUR2_YEAST	C2-C1	-0.183641	0.168505	-1.08982	8	0.307528	0.999512	NA	0	0
sp|P38993|FET3_YEAST	C2-C1	-0.0333258	0.0629967	-0.529009	8	0.611158	0.999512	NA	0	0
sp|P38994|MSS4_YEAST	C2-C1	-0.00620137	1.19818	-0.00517567	8	0.995997	0.999512	NA	0	0
sp|P38995|ATU2_YEAST	C2-C1	0.146487	0.526815	0.278062	8	0.788016	0.999512	NA	0	0
sp|P38996|NAB3_YEAST	C2-C1	0.106338	0.0739902	1.4372	8	0.188598	0.999512	NA	0	0
sp|P38998|LYS1_YEAST	C2-C1	-0.0599505	0.0675655	-0.887295	8	0.400808	0.999512	NA	0	0
sp|P38999|LYS9_YEAST	C2-C1	0.0362964	0.0453038	0.801178	8	0.446169	0.999512	NA	0	0
sp|P39001|UME6_YEAST	C2-C1	0.261419	0.288594	0.905837	8	0.391487	0.999512	NA	0	0
sp|P39002|LCF3_YEAST	C2-C1	0.0371632	0.118639	0.313245	8	0.762106	0.999512	NA	0	0
sp|P39005|KRE9_YEAST	C2-C1	0.0998299	0.303329	0.329114	8	0.75052	0.999512	NA	0	0
sp|P39006|PSD1_YEAST	C2-C1	-0.165431	0.157245	-1.05206	8	0.32351	0.999512	NA	0.0555556	0.0555556
sp|P39007|STT3_YEAST	C2-C1	-0.0414288	0.0539083	-0.768505	8	0.464267	0.999512	NA	0	0
sp|P39008|POP2_YEAST	C2-C1	-0.0411718	0.0589628	-0.698268	8	0.504797	0.999512	NA	0	0
sp|P39009|DUN1_YEAST	C2-C1	0.0270918	0.233273	0.116138	8	0.910406	0.999512	NA	0	0
sp|P39010|AKR1_YEAST	C2-C1	-0.212868	0.223953	-0.950501	8	0.369686	0.999512	NA	0	0
sp|P39011|BEM4_YEAST	C2-C1	0.00182997	0.109083	0.016776	8	0.987026	0.999512	NA	0	0
sp|P39012|GAA1_YEAST	C2-C1	0.0402488	0.186126	0.216246	8	0.834208	0.999512	NA	0.0277778	0.0277778
sp|P39013|END3_YEAST	C2-C1	0.0520502	0.118887	0.437812	8	0.673103	0.999512	NA	0	0
sp|P39015|STM1_YEAST	C2-C1	-0.020082	0.110579	-0.181608	8	0.860407	0.999512	NA	0	0
sp|P39016|MPT5_YEAST	C2-C1	-0.0175784	0.348091	-0.0504993	8	0.960963	0.999512	NA	0	0
sp|P39076|TCPB_YEAST	C2-C1	0.00867481	0.056874	0.152527	8	0.882548	0.999512	NA	0	0
sp|P39077|TCPG_YEAST	C2-C1	-0.0532239	0.0710879	-0.748706	8	0.475469	0.999512	NA	0	0
sp|P39078|TCPD_YEAST	C2-C1	0.0191635	0.0449537	0.426295	8	0.681132	0.999512	NA	0	0
sp|P39079|TCPZ_YEAST	C2-C1	-0.108529	0.0988266	-1.09818	8	0.304076	0.999512	NA	0	0
sp|P39081|PCF11_YEAST	C2-C1	0.0667755	0.115851	0.576391	8	0.580202	0.999512	NA	0	0
sp|P39101|CAJ1_YEAST	C2-C1	0.0426212	0.0518242	0.82242	8	0.434664	0.999512	NA	0	0
sp|P39103|COX14_YEAST	C2-C1	-0.0207638	0.80632	-0.0257513	8	0.980086	0.999512	NA	0	0
sp|P39104|PIK1_YEAST	C2-C1	0.0939552	0.119924	0.783456	8	0.455926	0.999512	NA	0	0
sp|P39105|PLB1_YEAST	C2-C1	0.0459555	0.1096	0.4193	8	0.686029	0.999512	NA	0	0
sp|P39106|MNN1_YEAST	C2-C1	0.000854804	0.095794	0.00892335	8	0.993099	0.999512	NA	0	0
sp|P39107|MNN9_YEAST	C2-C1	-0.112806	0.0736531	-1.53159	8	0.164159	0.999512	NA	0	0
sp|P39108|PEX7_YEAST	C2-C1	-0.0418029	0.875077	-0.0477705	8	0.96307	0.999512	NA	0	0
sp|P39109|YCFI_YEAST	C2-C1	0.0443218	0.051622	0.858584	8	0.415552	0.999512	NA	0	0
sp|P39110|CIN4_YEAST	C2-C1	0.0562703	0.162344	0.346611	8	0.737824	0.999512	NA	0	0
sp|P39111|VATF_YEAST	C2-C1	0.0740438	0.108577	0.681948	8	0.514527	0.999512	NA	0	0
sp|P39112|DSS1_YEAST	C2-C1	-2.68925	1.3829	-1.94464	8	0.0877156	0.999512	NA	0	0
sp|P39515|TIM17_YEAST	C2-C1	-0.933626	0.723331	-1.29073	8	0.232847	0.999512	NA	0	0
sp|P39517|DHH1_YEAST	C2-C1	-0.0081033	0.0840358	-0.0964268	8	0.925554	0.999512	NA	0	0
sp|P39518|LCF2_YEAST	C2-C1	-1.02585	1.04147	-0.985001	8	0.353472	0.999512	NA	0	0
sp|P39520|IFH1_YEAST	C2-C1	-0.184216	0.478553	-0.384944	8	0.710311	0.999512	NA	0	0
sp|P39521|FHL1_YEAST	C2-C1	-0.383731	0.554876	-0.691562	8	0.508781	0.999512	NA	0	0
sp|P39522|ILV3_YEAST	C2-C1	0.0166142	0.0684263	0.242805	8	0.814266	0.999512	NA	0	0
sp|P39523|YM11_YEAST	C2-C1	0.0796032	0.154041	0.516766	8	0.619298	0.999512	NA	0	0
sp|P39524|ATC3_YEAST	C2-C1	0.480456	0.445015	1.07964	8	0.311774	0.999512	NA	0	0
sp|P39525|CEM1_YEAST	C2-C1	0.354329	0.410633	0.862886	8	0.413319	0.999512	NA	0	0
sp|P39526|LAA1_YEAST	C2-C1	0.251811	0.209753	1.20051	8	0.264279	0.999512	NA	0	0
sp|P39531|RCY1_YEAST	C2-C1	0.128474	0.140822	0.912312	8	0.38827	0.999512	NA	0	0
sp|P39533|ACON2_YEAST	C2-C1	0.0260722	0.0633896	0.411301	8	0.691649	0.999512	NA	0	0
sp|P39535|PHO90_YEAST	C2-C1	-2.10318	1.40364	-1.49837	8	0.172417	0.999512	NA	0	0
sp|P39538|UBP12_YEAST	C2-C1	0.169477	0.0644522	2.6295	8	0.0302017	0.999512	NA	0	0
sp|P39540|ELO1_YEAST	C2-C1	-0.0363652	0.124066	-0.293112	8	0.776896	0.999512	NA	0	0
sp|P39542|YJT3_YEAST	C2-C1	-0.388514	0.487785	-0.796485	8	0.448739	0.999512	NA	0	0
sp|P39543|SOP4_YEAST	C2-C1	-0.0507308	0.178559	-0.284113	8	0.783539	0.999512	NA	0	0
sp|P39547|UIP3_YEAST	C2-C1	-0.0824902	0.24516	-0.336475	8	0.745169	0.999512	NA	0	0
sp|P39548|YAJ8_YEAST	C2-C1	-0.076378	0.0740158	-1.03191	8	0.332297	0.999512	NA	0	0
sp|P39552|MST28_YEAST	C2-C1	-0.259509	0.186368	-1.39245	8	0.201267	0.999512	NA	0	0
sp|P39567|IMDH1_YEAST	C2-C1	0.44131	0.578912	0.762309	8	0.467753	0.999512	NA	0	0
sp|P39676|FHP_YEAST	C2-C1	0.0318392	0.0691499	0.460437	8	0.65746	0.999512	NA	0	0
sp|P39677|RRF2M_YEAST	C2-C1	0.718188	0.742938	0.966686	8	0.362012	0.999512	NA	0	0
sp|P39682|PRP39_YEAST	C2-C1	0.0340101	0.0715416	0.475389	8	0.647219	0.999512	NA	0	0
sp|P39683|NPT1_YEAST	C2-C1	-0.0109835	0.0424678	-0.258631	8	0.80245	0.999512	NA	0	0
sp|P39685|PO152_YEAST	C2-C1	0.0100104	0.0519789	0.192586	8	0.852082	0.999512	NA	0.0151515	0.0151515
sp|P39692|MET10_YEAST	C2-C1	0.0685288	0.123824	0.553439	8	0.595088	0.999512	NA	0	0
sp|P39704|ERP2_YEAST	C2-C1	-0.191803	0.27868	-0.688253	8	0.510754	0.999512	NA	0	0
sp|P39705|NUP60_YEAST	C2-C1	0.0663735	0.0921603	0.720196	8	0.491908	0.999512	NA	0	0
sp|P39708|DHE5_YEAST	C2-C1	-2.02086	1.63393	-1.23681	8	0.251231	0.999512	NA	0	0
sp|P39713|BDH2_YEAST	C2-C1	-0.00510952	0.097887	-0.0521981	8	0.959651	0.999512	NA	0	0
sp|P39714|BDH1_YEAST	C2-C1	-0.175101	0.170347	-1.02791	8	0.334066	0.999512	NA	0	0
sp|P39715|ECM1_YEAST	C2-C1	-0.0698654	0.0626909	-1.11444	8	0.297447	0.999512	NA	0	0
sp|P39717|GPB2_YEAST	C2-C1	0.860844	1.10074	0.782062	8	0.456699	0.999512	NA	0	0
sp|P39719|FLC2_YEAST	C2-C1	0.00925356	0.284528	0.0325225	8	0.974852	0.999512	NA	0	0
sp|P39721|AIM2_YEAST	C2-C1	-0.247239	0.105951	-2.33352	8	0.0478981	0.999512	NA	0	0
sp|P39722|GEM1_YEAST	C2-C1	0.537039	0.696288	0.771289	8	0.462706	0.999512	NA	0.0833333	0.0833333
sp|P39724|AIM1_YEAST	C2-C1	-0.0390023	0.152637	-0.255523	8	0.804766	0.999512	NA	0	0
sp|P39726|GCSH_YEAST	C2-C1	0.0333423	0.086902	0.383677	8	0.711213	0.999512	NA	0	0
sp|P39727|ERV46_YEAST	C2-C1	-0.195478	0.237764	-0.822153	8	0.434808	0.999512	NA	0	0
sp|P39729|RBG1_YEAST	C2-C1	-0.0225426	0.0785672	-0.286922	8	0.781463	0.999512	NA	0	0
sp|P39730|IF2P_YEAST	C2-C1	-0.044947	0.0564407	-0.796359	8	0.448808	0.999512	NA	0.00537634	0.00537634
sp|P39731|MTW1_YEAST	C2-C1	0.292441	0.32275	0.906091	8	0.391361	0.999512	NA	0	0
sp|P39732|GIP4_YEAST	C2-C1	1.09706	1.08077	1.01507	8	0.339784	0.999512	NA	0	0
sp|P39742|SEC72_YEAST	C2-C1	-0.0743944	0.153251	-0.485442	8	0.640378	0.999512	NA	0	0
sp|P39743|RV167_YEAST	C2-C1	-0.0127895	0.0982491	-0.130174	8	0.899642	0.999512	NA	0.0444444	0.0444444
sp|P39744|NOC2_YEAST	C2-C1	-0.0954656	0.10717	-0.89079	8	0.399039	0.999512	NA	0	0
sp|P39904|VPS52_YEAST	C2-C1	0.560679	0.443448	1.26436	8	0.241691	0.999512	NA	0	0
sp|P39925|AFG3_YEAST	C2-C1	-0.0135792	0.21327	-0.0636715	8	0.950794	0.999512	NA	0	0
sp|P39926|SSO2_YEAST	C2-C1	0.0763587	0.107576	0.709812	8	0.497985	0.999512	NA	0	0
sp|P39927|PTI1_YEAST	C2-C1	-0.0719631	0.0821784	-0.875693	8	0.40672	0.999512	NA	0	0
sp|P39929|SNF7_YEAST	C2-C1	-0.134426	0.182027	-0.738497	8	0.481313	0.999512	NA	0	0
sp|P39931|SS120_YEAST	C2-C1	0.0861394	0.13008	0.662202	8	0.526454	0.999512	NA	0	0
sp|P39935|IF4F1_YEAST	C2-C1	-0.0601283	0.157301	-0.38225	8	0.71223	0.999512	NA	0	0
sp|P39936|IF4F2_YEAST	C2-C1	0.0372486	0.0930598	0.400265	8	0.699437	0.999512	NA	0.0238095	0.0238095
sp|P39938|RS26A_YEAST	C2-C1	0.293123	0.335689	0.873199	8	0.407999	0.999512	NA	0	0
sp|P39939|RS26B_YEAST	C2-C1	-0.162366	0.59547	-0.27267	8	0.792013	0.999512	NA	0	0
sp|P39940|RSP5_YEAST	C2-C1	-0.126328	0.157679	-0.801174	8	0.446171	0.999512	NA	0	0
sp|P39945|AST2_YEAST	C2-C1	1.61465	1.05506	1.53039	8	0.164451	0.999512	NA	0	0
sp|P39952|OXA1_YEAST	C2-C1	0.0802131	0.124106	0.64633	8	0.536163	0.999512	NA	0	0
sp|P39954|SAHH_YEAST	C2-C1	-0.0223455	0.0643254	-0.347382	8	0.737266	0.999512	NA	0	0
sp|P39955|SAP1_YEAST	C2-C1	0.709379	0.840222	0.844276	8	0.423042	0.999512	NA	0	0
sp|P39956|RPH1_YEAST	C2-C1	-0.614754	0.261883	-2.34744	8	0.0468684	0.999512	NA	0	0
sp|P39958|GDI1_YEAST	C2-C1	-0.0513023	0.102076	-0.502589	8	0.628794	0.999512	NA	0	0
sp|P39960|BEM2_YEAST	C2-C1	0.00594281	0.0629952	0.0943375	8	0.927161	0.999512	NA	0	0
sp|P39962|KC13_YEAST	C2-C1	0.131085	0.405252	0.323467	8	0.754636	0.999512	NA	0	0
sp|P39965|SYPM_YEAST	C2-C1	-0.0724412	0.0729777	-0.992649	8	0.349952	0.999512	NA	0	0
sp|P39966|PP2C2_YEAST	C2-C1	-0.0207161	0.0996868	-0.207812	8	0.840569	0.999512	NA	0	0
sp|P39968|VAC8_YEAST	C2-C1	-0.120909	0.0661904	-1.82668	8	0.10517	0.999512	NA	0	0
sp|P39969|BOI2_YEAST	C2-C1	-0.113187	0.102743	-1.10165	8	0.30265	0.999512	NA	0	0
sp|P39976|DLD3_YEAST	C2-C1	0.0433466	0.0805787	0.53794	8	0.605256	0.999512	NA	0	0
sp|P39979|HPA3_YEAST	C2-C1	-0.166972	0.225209	-0.741408	8	0.479642	0.999512	NA	0	0
sp|P39984|HAT2_YEAST	C2-C1	0.329241	0.206872	1.59152	8	0.150157	0.999512	NA	0	0
sp|P39985|DPO5_YEAST	C2-C1	-0.0243088	0.065663	-0.370205	8	0.720839	0.999512	NA	0.0151515	0.0151515
sp|P39986|ATC6_YEAST	C2-C1	-0.0324264	0.0583609	-0.555619	8	0.593665	0.999512	NA	0	0
sp|P39987|HSP7E_YEAST	C2-C1	5.98009	6.40555	0.933581	6	0.38655	0.999512	NA	0.333333	0
sp|P39990|SNU13_YEAST	C2-C1	-0.321903	0.18409	-1.74862	8	0.118482	0.999512	NA	0	0
sp|P39991|YEC5_YEAST	C2-C1	-0.328628	0.528631	-0.621659	8	0.551466	0.999512	NA	0	0
sp|P39992|YEC3_YEAST	C2-C1	0.162296	0.439596	0.369193	8	0.721564	0.999512	NA	0	0
sp|P39993|GEA2_YEAST	C2-C1	0.173309	0.113491	1.52708	8	0.165259	0.999512	NA	0	0
sp|P39994|YEC0_YEAST	C2-C1	0.16646	0.201025	0.828057	8	0.431645	0.999512	NA	0	0
sp|P39995|EAF5_YEAST	C2-C1	-0.71543	0.470891	-1.51931	8	0.167168	0.999512	NA	0	0
sp|P39996|GTT3_YEAST	C2-C1	0.0141594	0.538725	0.0262831	8	0.979675	0.999512	NA	0.0833333	0.0833333
sp|P39998|EDC3_YEAST	C2-C1	-0.139732	0.164205	-0.850965	8	0.419529	0.999512	NA	0.0138889	0.0138889
sp|P40002|MIT1_YEAST	C2-C1	-0.300417	0.301403	-0.996729	8	0.348085	0.999512	NA	0	0
sp|P40005|PFD2_YEAST	C2-C1	-0.190574	0.242205	-0.78683	8	0.454057	0.999512	NA	0	0
sp|P40006|IRC22_YEAST	C2-C1	-0.0836358	0.198793	-0.420719	8	0.685035	0.999512	NA	0	0
sp|P40007|NOP16_YEAST	C2-C1	-0.0299061	0.0992018	-0.301468	8	0.770745	0.999512	NA	0	0
sp|P40008|FMP52_YEAST	C2-C1	0.0537445	0.0563712	0.953404	8	0.3683	0.999512	NA	0	0
sp|P40009|YND1_YEAST	C2-C1	0.0721393	0.364107	0.198127	8	0.847888	0.999512	NA	0	0
sp|P40010|NUG1_YEAST	C2-C1	-0.0796926	0.0393073	-2.02743	8	0.0771648	0.999512	NA	0	0
sp|P40011|RRAAH_YEAST	C2-C1	0.0384701	0.149945	0.256562	8	0.803991	0.999512	NA	0	0
sp|P40012|PPOX_YEAST	C2-C1	-0.0140643	0.0952142	-0.147712	8	0.886225	0.999512	NA	0	0
sp|P40013|BIM1_YEAST	C2-C1	-0.0290413	0.192668	-0.150732	8	0.883918	0.999512	NA	0	0
sp|P40014|SPC25_YEAST	C2-C1	-0.0312444	0.397193	-0.078663	8	0.939233	0.999512	NA	0	0
sp|P40015|ISC1_YEAST	C2-C1	0.05673	0.156051	0.363534	8	0.725625	0.999512	NA	0	0
sp|P40016|RPN3_YEAST	C2-C1	-0.113714	0.0711056	-1.59923	8	0.148436	0.999512	NA	0	0
sp|P40018|RSMB_YEAST	C2-C1	-0.107668	0.0708384	-1.51991	8	0.167021	0.999512	NA	0	0
sp|P40019|CHZ1_YEAST	C2-C1	0.0583642	0.174567	0.334337	8	0.746722	0.999512	NA	0	0
sp|P40020|FIR1_YEAST	C2-C1	-0.587799	1.44032	-0.408104	8	0.693902	0.999512	NA	0	0
sp|P40021|ZRG8_YEAST	C2-C1	-1.0605	1.03558	-1.02406	8	0.335774	0.999512	NA	0	0
sp|P40022|YEM4_YEAST	C2-C1	0.0533366	0.504048	0.105816	8	0.918333	0.999512	NA	0	0
sp|P40024|ARB1_YEAST	C2-C1	-0.0307184	0.0933558	-0.329046	8	0.75057	0.999512	NA	0	0
sp|P40028|YEN1_YEAST	C2-C1	0.00665026	0.737953	0.00901177	8	0.99303	0.999512	NA	0	0
sp|P40029|MSRA_YEAST	C2-C1	-0.0941555	0.161446	-0.5832	8	0.575826	0.999512	NA	0	0
sp|P40030|ERG28_YEAST	C2-C1	0.00590995	0.217285	0.0271991	8	0.978967	0.999512	NA	0	0
sp|P40032|TPA1_YEAST	C2-C1	-0.0892961	0.0399295	-2.23634	8	0.0557427	0.999512	NA	0	0
sp|P40033|RSM18_YEAST	C2-C1	-0.0776376	0.334149	-0.232344	8	0.822104	0.999512	NA	0	0
sp|P40035|PIC2_YEAST	C2-C1	0.161755	0.124807	1.29604	8	0.2311	0.999512	NA	0	0
sp|P40037|HMF1_YEAST	C2-C1	0.0184795	0.161301	0.114566	8	0.911613	0.999512	NA	0	0
sp|P40038|PCL6_YEAST	C2-C1	0.0466157	0.191599	0.243299	8	0.813896	0.999512	NA	0	0
sp|P40040|THO1_YEAST	C2-C1	0.049549	0.162286	0.30532	8	0.767916	0.999512	NA	0	0
sp|P40043|RGI1_YEAST	C2-C1	-0.257337	0.238093	-1.08083	8	0.311276	0.999512	NA	0	0
sp|P40045|TDA2_YEAST	C2-C1	-0.807464	0.53887	-1.49844	8	0.1724	0.999512	NA	0	0
sp|P40047|ALDH5_YEAST	C2-C1	0.0251635	0.0712499	0.353173	8	0.733084	0.999512	NA	0	0
sp|P40050|YEQ7_YEAST	C2-C1	-0.328271	1.55756	-0.210759	7	0.839079	0.999512	NA	0	0
sp|P40051|ICP55_YEAST	C2-C1	0.40602	1.18901	0.341478	8	0.74154	0.999512	NA	0	0
sp|P40052|YEQ9_YEAST	C2-C1	-0.296822	0.287887	-1.03103	8	0.332685	0.999512	NA	0	0
sp|P40053|AIM9_YEAST	C2-C1	0.0386544	0.0887255	0.435662	8	0.674598	0.999512	NA	0	0
sp|P40054|SERA_YEAST	C2-C1	0.0260119	0.24246	0.107283	8	0.917206	0.999512	NA	0	0
sp|P40055|UTP7_YEAST	C2-C1	0.0649044	0.162196	0.400159	8	0.699512	0.999512	NA	0	0
sp|P40056|GET2_YEAST	C2-C1	-0.0837097	0.0485672	-1.72359	8	0.123074	0.999512	NA	0	0
sp|P40059|DOT6_YEAST	C2-C1	-0.0458869	0.101148	-0.453664	8	0.662124	0.999512	NA	0	0
sp|P40060|IES5_YEAST	C2-C1	0.478283	0.667403	0.716633	8	0.493987	0.999512	NA	0	0
sp|P40061|TSC11_YEAST	C2-C1	-0.0680785	0.155357	-0.438208	8	0.672827	0.999512	NA	0	0
sp|P40064|NU157_YEAST	C2-C1	-0.0257234	0.0659796	-0.389869	8	0.706808	0.999512	NA	0.0462963	0.0462963
sp|P40066|GLE2_YEAST	C2-C1	0.0280608	0.0860161	0.326227	8	0.752623	0.999512	NA	0	0
sp|P40068|FLO8_YEAST	C2-C1	-2.2432	1.84516	-1.21572	8	0.258745	0.999512	NA	0	0
sp|P40069|IMB4_YEAST	C2-C1	-0.0300736	0.0399878	-0.752069	8	0.473554	0.999512	NA	0	0
sp|P40070|LSM4_YEAST	C2-C1	0.0469332	0.0997012	0.470739	8	0.650395	0.999512	NA	0	0
sp|P40071|TMN3_YEAST	C2-C1	0.354657	0.318395	1.11389	8	0.29767	0.999512	NA	0	0
sp|P40073|SHO1_YEAST	C2-C1	0.0113743	0.640465	0.0177595	8	0.986266	0.999512	NA	0	0
sp|P40075|SCS2_YEAST	C2-C1	0.0151928	0.0589007	0.257939	8	0.802965	0.999512	NA	0	0
sp|P40078|NSA2_YEAST	C2-C1	0.0875975	0.11131	0.786965	8	0.453982	0.999512	NA	0	0
sp|P40079|LCP5_YEAST	C2-C1	0.0727254	0.150444	0.483405	8	0.641761	0.999512	NA	0.0238095	0.0238095
sp|P40081|MGDP1_YEAST	C2-C1	-0.130429	0.122945	-1.06088	8	0.319719	0.999512	NA	0	0
sp|P40084|RTR1_YEAST	C2-C1	-0.0334858	0.140866	-0.237714	8	0.818078	0.999512	NA	0	0
sp|P40086|COX15_YEAST	C2-C1	-0.000700932	0.0623587	-0.0112403	8	0.991307	0.999512	NA	0	0
sp|P40087|DDI1_YEAST	C2-C1	0.00215	0.173367	0.0124014	8	0.990409	0.999512	NA	0	0
sp|P40088|FTR1_YEAST	C2-C1	0.0033406	0.137209	0.0243468	8	0.981172	0.999512	NA	0.0555556	0.0555556
sp|P40089|LSM5_YEAST	C2-C1	0.0296476	0.067708	0.437874	8	0.673059	0.999512	NA	0	0
sp|P40091|PEA2_YEAST	C2-C1	-0.38245	0.182425	-2.09648	8	0.0693163	0.999512	NA	0	0
sp|P40093|YEY6_YEAST	C2-C1	0.00928274	0.106684	0.0870118	8	0.932801	0.999512	NA	0	0
sp|P40094|COG3_YEAST	C2-C1	0.828137	0.337489	2.45382	8	0.0396997	0.999512	NA	0	0
sp|P40096|NCB1_YEAST	C2-C1	0.0555833	0.185612	0.29946	8	0.772222	0.999512	NA	0	0
sp|P40098|FMP10_YEAST	C2-C1	0.0563101	0.0810218	0.695	8	0.506736	0.999512	NA	0	0
sp|P40099|FTHC_YEAST	C2-C1	0.12926	0.212964	0.60696	8	0.560704	0.999512	NA	0	0
sp|P40106|GPP2_YEAST	C2-C1	-0.00293319	0.109447	-0.0268001	8	0.979276	0.999512	NA	0	0
sp|P40150|HSP76_YEAST	C2-C1	-0.0996	0.0765041	-1.30189	8	0.229187	0.999512	NA	0	0
sp|P40152|YNV7_YEAST	C2-C1	-0.0919141	0.0753571	-1.21971	8	0.257309	0.999512	NA	0	0
sp|P40154|IES2_YEAST	C2-C1	-0.130039	0.268036	-0.485157	8	0.640571	0.999512	NA	0	0
sp|P40155|PEX17_YEAST	C2-C1	-1.9226	0.75774	-2.53728	8	0.0348579	0.999512	NA	0	0
sp|P40157|VID27_YEAST	C2-C1	-0.0749664	0.0909685	-0.824092	8	0.433767	0.999512	NA	0	0
sp|P40159|YNU8_YEAST	C2-C1	-0.0132073	0.0807065	-0.163646	8	0.874068	0.999512	NA	0	0
sp|P40160|RIO2_YEAST	C2-C1	-0.0252559	0.104847	-0.240882	8	0.815705	0.999512	NA	0	0
sp|P40161|RT106_YEAST	C2-C1	-0.0606958	0.0975898	-0.621948	8	0.551285	0.999512	NA	0	0
sp|P40164|PP4R3_YEAST	C2-C1	0.0323695	0.0695762	0.465238	8	0.654163	0.999512	NA	0.0185185	0.0185185
sp|P40165|NNRE_YEAST	C2-C1	0.0545906	0.0728407	0.749452	8	0.475043	0.999512	NA	0	0
sp|P40185|MMF1_YEAST	C2-C1	0.0561655	0.123928	0.45321	8	0.662437	0.999512	NA	0	0
sp|P40187|PIG2_YEAST	C2-C1	0.348187	0.36599	0.951356	8	0.369277	0.999512	NA	0	0
sp|P40202|CCS1_YEAST	C2-C1	-0.100207	0.100471	-0.99737	8	0.347792	0.999512	NA	0	0
sp|P40204|RUXG_YEAST	C2-C1	-0.0759078	0.245369	-0.309362	8	0.76495	0.999512	NA	0	0
sp|P40206|JLP2_YEAST	C2-C1	-0.390657	0.228923	-1.7065	8	0.126303	0.999512	NA	0	0
sp|P40207|YM17_YEAST	C2-C1	0.14235	0.660985	0.21536	8	0.834876	0.999512	NA	0	0
sp|P40210|SIP5_YEAST	C2-C1	0.158178	0.112642	1.40425	8	0.197855	0.999512	NA	0	0
sp|P40214|YM22_YEAST	C2-C1	-0.132762	0.167724	-0.791552	8	0.451451	0.999512	NA	0	0
sp|P40215|NDH1_YEAST	C2-C1	-0.0444077	0.118373	-0.37515	8	0.7173	0.999512	NA	0	0
sp|P40217|EIF3I_YEAST	C2-C1	0.0985209	0.101777	0.968008	8	0.36139	0.999512	NA	0.00833333	0.00833333
sp|P40218|YM24_YEAST	C2-C1	-0.247068	0.179494	-1.37647	8	0.205969	0.999512	NA	0	0
sp|P40219|OSW5_YEAST	C2-C1	0.0777995	0.376228	0.206788	8	0.841342	0.999512	NA	0	0
sp|P40302|PSA6_YEAST	C2-C1	0.0305365	0.0825105	0.370092	8	0.72092	0.999512	NA	0	0
sp|P40303|PSA4_YEAST	C2-C1	0.0318213	0.0604614	0.526307	8	0.612949	0.999512	NA	0	0
sp|P40308|TGL3_YEAST	C2-C1	-0.0327422	0.24469	-0.133811	8	0.896857	0.999512	NA	0	0
sp|P40309|KHA1_YEAST	C2-C1	0.948851	2.27039	0.417925	7	0.688524	0.999512	NA	0.166667	0
sp|P40312|CYB5_YEAST	C2-C1	-0.125573	0.257753	-0.487185	8	0.639196	0.999512	NA	0	0
sp|P40317|SOK1_YEAST	C2-C1	-0.534562	0.396467	-1.34831	8	0.214485	0.999512	NA	0	0
sp|P40318|DOA10_YEAST	C2-C1	0.145408	0.075589	1.92367	8	0.0906016	0.999512	NA	0	0
sp|P40319|ELO3_YEAST	C2-C1	0.166758	0.0918737	1.81508	8	0.107055	0.999512	NA	0	0
sp|P40325|HUA1_YEAST	C2-C1	0.0380255	0.149923	0.253634	8	0.806175	0.999512	NA	0	0
sp|P40327|PRS4_YEAST	C2-C1	0.0104176	0.113394	0.0918707	8	0.92906	0.999512	NA	0.0104167	0.0104167
sp|P40328|TBP6_YEAST	C2-C1	0.0671483	1.86561	0.0359927	8	0.97217	0.999512	NA	0	0
sp|P40335|PEP8_YEAST	C2-C1	0.228877	0.127368	1.79697	8	0.110061	0.999512	NA	0	0
sp|P40339|RFC4_YEAST	C2-C1	-0.0421582	0.0893292	-0.471942	8	0.649573	0.999512	NA	0	0
sp|P40340|TBP7_YEAST	C2-C1	-0.0267501	0.0746805	-0.358193	8	0.729466	0.999512	NA	0.0138889	0.0138889
sp|P40341|YTA12_YEAST	C2-C1	-0.11219	0.152179	-0.737229	8	0.482043	0.999512	NA	0	0
sp|P40343|VPS27_YEAST	C2-C1	0.0385894	0.113453	0.340137	8	0.742512	0.999512	NA	0	0
sp|P40344|ATG3_YEAST	C2-C1	0.198617	0.994008	0.199814	6	0.848226	0.999512	NA	0.166667	0
sp|P40345|PDAT_YEAST	C2-C1	-0.16125	0.0865148	-1.86384	8	0.099343	0.999512	NA	0	0
sp|P40347|PPAL_YEAST	C2-C1	-0.0301413	0.173738	-0.173487	8	0.866578	0.999512	NA	0.0416667	0.0416667
sp|P40348|RFC2_YEAST	C2-C1	-0.0299359	0.045594	-0.656577	8	0.529883	0.999512	NA	0	0
sp|P40350|ALG5_YEAST	C2-C1	0.0192165	0.464535	0.0413672	8	0.968017	0.999512	NA	0	0
sp|P40351|ALG8_YEAST	C2-C1	0.0073283	0.147859	0.0495629	8	0.961686	0.999512	NA	0	0
sp|P40352|RAD26_YEAST	C2-C1	2.32504	1.07978	2.15326	8	0.0634521	0.999512	NA	0	0
sp|P40353|ATF1_YEAST	C2-C1	0.595141	0.834995	0.712748	8	0.496262	0.999512	NA	0	0
sp|P40354|NTA1_YEAST	C2-C1	-0.0290666	0.236976	-0.122656	8	0.905405	0.999512	NA	0	0
sp|P40356|MED3_YEAST	C2-C1	-0.20869	0.147973	-1.41033	8	0.19612	0.999512	NA	0	0
sp|P40357|SEC9_YEAST	C2-C1	0.0379572	0.137799	0.275453	8	0.789949	0.999512	NA	0	0
sp|P40358|JEM1_YEAST	C2-C1	-0.692509	0.658182	-1.05215	8	0.323468	0.999512	NA	0	0
sp|P40361|YJH0_YEAST	C2-C1	0.0112662	1.09888	0.0102524	8	0.992071	0.999512	NA	0	0
sp|P40362|UTP18_YEAST	C2-C1	0.0815807	0.118612	0.687797	8	0.511026	0.999512	NA	0	0
sp|P40363|SFGH_YEAST	C2-C1	0.0100202	0.0682741	0.146765	8	0.886949	0.999512	NA	0	0
sp|P40364|MPM1_YEAST	C2-C1	-0.11178	0.151905	-0.735852	8	0.482835	0.999512	NA	0	0
sp|P40366|DLS1_YEAST	C2-C1	0.030779	0.80939	0.0380274	8	0.970598	0.999512	NA	0	0
sp|P40367|GPI7_YEAST	C2-C1	-0.213121	0.223803	-0.95227	8	0.368841	0.999512	NA	0	0
sp|P40368|NUP82_YEAST	C2-C1	-0.0419759	0.116502	-0.3603	8	0.72795	0.999512	NA	0	0
sp|P40413|TCPE_YEAST	C2-C1	-0.0689396	0.0540504	-1.27547	8	0.237932	0.999512	NA	0	0
sp|P40414|TPM2_YEAST	C2-C1	-0.272851	0.220925	-1.23504	8	0.251857	0.999512	NA	0	0
sp|P40416|ATM1_YEAST	C2-C1	-0.489952	0.57263	-0.855617	8	0.417098	0.999512	NA	0	0
sp|P40422|RPAB4_YEAST	C2-C1	0.0415438	0.0790466	0.525561	8	0.613445	0.999512	NA	0	0
sp|P40433|6P21_YEAST	C2-C1	-0.881994	0.574772	-1.53451	8	0.16345	0.999512	NA	0	0
sp|P40449|YIQ1_YEAST	C2-C1	0.0935487	0.24349	0.384199	8	0.710841	0.999512	NA	0	0
sp|P40452|COA1_YEAST	C2-C1	0.221716	0.37324	0.59403	8	0.568905	0.999512	NA	0	0
sp|P40453|UBP7_YEAST	C2-C1	0.227784	0.217516	1.04721	8	0.32561	0.999512	NA	0	0
sp|P40454|PTPA1_YEAST	C2-C1	1.27058	0.911798	1.39349	8	0.200966	0.999512	NA	0	0
sp|P40456|YI151_YEAST	C2-C1	0.120255	0.18262	0.6585	8	0.528709	0.999512	NA	0	0
sp|P40457|MLP2_YEAST	C2-C1	0.0773966	0.0966056	0.801161	8	0.446179	0.999512	NA	0	0
sp|P40459|PANC_YEAST	C2-C1	-0.00802171	0.0654787	-0.122509	8	0.905518	0.999512	NA	0	0
sp|P40460|NDC80_YEAST	C2-C1	-0.165444	0.456534	-0.362392	8	0.726446	0.999512	NA	0.0555556	0.0555556
sp|P40462|TM108_YEAST	C2-C1	0.0452158	0.0764958	0.591089	8	0.57078	0.999512	NA	0	0
sp|P40463|VHS2_YEAST	C2-C1	0.0554894	0.496371	0.11179	8	0.913744	0.999512	NA	0	0
sp|P40466|FKH1_YEAST	C2-C1	0.0117564	0.0936933	0.125478	8	0.903241	0.999512	NA	0	0
sp|P40467|ASG1_YEAST	C2-C1	-0.418839	0.416501	-1.00562	8	0.344045	0.999512	NA	0	0
sp|P40468|TAO3_YEAST	C2-C1	-0.183721	0.211439	-0.868909	8	0.410206	0.999512	NA	0	0
sp|P40469|MET18_YEAST	C2-C1	-0.186042	0.0806835	-2.30582	8	0.0500145	0.999512	NA	0	0
sp|P40470|RRT14_YEAST	C2-C1	0.232854	0.373814	0.622913	8	0.550682	0.999512	NA	0	0
sp|P40471|AYR1_YEAST	C2-C1	-0.00869937	0.0570347	-0.152528	8	0.882547	0.999512	NA	0	0
sp|P40472|SIM1_YEAST	C2-C1	0.15871	0.554897	0.286016	8	0.782132	0.999512	NA	0	0
sp|P40474|QDR2_YEAST	C2-C1	0.0152141	0.116365	0.130745	8	0.899205	0.999512	NA	0	0
sp|P40476|PRM5_YEAST	C2-C1	0.136333	0.124932	1.09125	8	0.306934	0.999512	NA	0	0
sp|P40477|NU159_YEAST	C2-C1	0.0437368	0.077048	0.567656	8	0.585842	0.999512	NA	0.00555556	0.00555556
sp|P40478|VDAC2_YEAST	C2-C1	-0.0525166	0.213318	-0.246189	8	0.811735	0.999512	NA	0	0
sp|P40480|HOS4_YEAST	C2-C1	1.76755	2.30255	0.76765	8	0.464747	0.999512	NA	0	0
sp|P40481|HPM1_YEAST	C2-C1	0.0589105	0.0735683	0.80076	8	0.446398	0.999512	NA	0	0
sp|P40482|SEC24_YEAST	C2-C1	-0.0216814	0.0592748	-0.365778	8	0.724014	0.999512	NA	0	0
sp|P40483|YIK8_YEAST	C2-C1	-0.0054578	0.110085	-0.049578	8	0.961674	0.999512	NA	0	0
sp|P40484|MOB1_YEAST	C2-C1	-0.335311	0.335827	-0.998462	8	0.347294	0.999512	NA	0.133333	0.133333
sp|P40485|SLM1_YEAST	C2-C1	-0.129942	0.0979811	-1.3262	8	0.221385	0.999512	NA	0	0
sp|P40486|SHQ1_YEAST	C2-C1	-0.173724	0.22542	-0.770667	8	0.463055	0.999512	NA	0	0
sp|P40487|DPH1_YEAST	C2-C1	-0.171826	0.224049	-0.766915	8	0.46516	0.999512	NA	0	0
sp|P40491|FMC1_YEAST	C2-C1	0.819178	0.330633	2.4776	8	0.0382542	0.999512	NA	0	0
sp|P40493|YIJ6_YEAST	C2-C1	-0.207721	0.617868	-0.33619	8	0.745376	0.999512	NA	0	0
sp|P40494|PRK1_YEAST	C2-C1	-0.0838962	0.33482	-0.250571	8	0.808461	0.999512	NA	0	0
sp|P40495|LYS12_YEAST	C2-C1	0.0635704	0.0546378	1.16349	8	0.278157	0.999512	NA	0	0
sp|P40496|RT25_YEAST	C2-C1	-0.0744549	0.120106	-0.619911	8	0.55256	0.999512	NA	0	0
sp|P40498|UTP25_YEAST	C2-C1	-0.0781085	0.0667491	-1.17018	8	0.275605	0.999512	NA	0	0
sp|P40499|ICE2_YEAST	C2-C1	-0.917169	0.964155	-0.951267	8	0.36932	0.999512	NA	0	0
sp|P40501|AVT7_YEAST	C2-C1	0.328718	0.262116	1.2541	8	0.24521	0.999512	NA	0	0
sp|P40502|AIM19_YEAST	C2-C1	-1.52728	1.57772	-0.96803	8	0.36138	0.999512	NA	0	0
sp|P40504|KTR7_YEAST	C2-C1	-0.806063	0.883147	-0.912716	8	0.388069	0.999512	NA	0	0
sp|P40505|SDS3_YEAST	C2-C1	0.121747	0.148844	0.817955	8	0.437066	0.999512	NA	0	0
sp|P40506|PPCS_YEAST	C2-C1	0.057856	0.130627	0.44291	8	0.669563	0.999512	NA	0	0
sp|P40507|AIR1_YEAST	C2-C1	-0.174375	0.886164	-0.196775	8	0.848911	0.999512	NA	0	0
sp|P40509|COPE_YEAST	C2-C1	-0.00522142	0.0852105	-0.0612767	8	0.952642	0.999512	NA	0	0
sp|P40510|SER33_YEAST	C2-C1	0.153525	0.0792652	1.93686	8	0.0887762	0.999512	NA	0	0
sp|P40513|MAM33_YEAST	C2-C1	0.0977856	0.150914	0.647957	8	0.535163	0.999512	NA	0	0
sp|P40514|YIG7_YEAST	C2-C1	0.910238	0.966771	0.941524	8	0.373994	0.999512	NA	0	0
sp|P40515|FIS1_YEAST	C2-C1	0.0449672	0.082142	0.547433	8	0.599017	0.999512	NA	0	0
sp|P40516|SEE1_YEAST	C2-C1	-0.19703	0.115774	-1.70184	8	0.127197	0.999512	NA	0	0
sp|P40517|YRB2_YEAST	C2-C1	-0.127322	0.0860849	-1.47902	8	0.177396	0.999512	NA	0	0
sp|P40518|ARPC5_YEAST	C2-C1	0.0459765	0.0327232	1.40501	8	0.197637	0.999512	NA	0.0666667	0.0666667
sp|P40522|VHR1_YEAST	C2-C1	0.218563	0.148273	1.47406	8	0.178693	0.999512	NA	0	0
sp|P40527|ATC7_YEAST	C2-C1	-0.0672689	0.290276	-0.231741	8	0.822557	0.999512	NA	0	0
sp|P40528|SYG1_YEAST	C2-C1	0.0203302	0.0805836	0.252287	8	0.80718	0.999512	NA	0	0
sp|P40529|AGE2_YEAST	C2-C1	-0.0749686	0.151296	-0.495508	8	0.633565	0.999512	NA	0	0
sp|P40531|GVP36_YEAST	C2-C1	0.00357836	0.0887319	0.0403277	8	0.96882	0.999512	NA	0	0
sp|P40533|TED1_YEAST	C2-C1	0.136876	0.349706	0.391403	8	0.705718	0.999512	NA	0	0
sp|P40535|ACA2_YEAST	C2-C1	-0.182054	0.121393	-1.49971	8	0.172078	0.999512	NA	0	0
sp|P40537|ULP2_YEAST	C2-C1	-0.798906	1.24206	-0.643208	7	0.540579	0.999512	NA	0	0
sp|P40540|EMC5_YEAST	C2-C1	0.0536909	0.226084	0.237482	8	0.818252	0.999512	NA	0	0
sp|P40541|SCC3_YEAST	C2-C1	0.00733028	0.126971	0.0577318	8	0.955378	0.999512	NA	0	0
sp|P40545|HIS4_YEAST	C2-C1	-0.146802	0.213267	-0.688349	8	0.510697	0.999512	NA	0	0
sp|P40547|VID28_YEAST	C2-C1	0.342891	0.763172	0.449297	8	0.66514	0.999512	NA	0	0
sp|P40548|SNL1_YEAST	C2-C1	-0.0424835	0.196463	-0.216242	8	0.834211	0.999512	NA	0	0
sp|P40549|MNT3_YEAST	C2-C1	1.5078	0.878645	1.71605	8	0.12449	0.999512	NA	0	0
sp|P40550|PDR11_YEAST	C2-C1	0.642152	1.29614	0.495432	8	0.633616	0.999512	NA	0	0
sp|P40551|YIB2_YEAST	C2-C1	-0.141792	0.413746	-0.342703	8	0.740653	0.999512	NA	0	0
sp|P40553|DOT5_YEAST	C2-C1	0.0364421	0.0939098	0.388055	8	0.708098	0.999512	NA	0	0
sp|P40554|URM1_YEAST	C2-C1	0.176337	0.212133	0.831256	8	0.429939	0.999512	NA	0	0
sp|P40555|PSMD9_YEAST	C2-C1	-0.131644	0.144076	-0.913707	8	0.387579	0.999512	NA	0	0
sp|P40557|EPS1_YEAST	C2-C1	-0.00522292	0.0548745	-0.0951792	8	0.926513	0.999512	NA	0	0
sp|P40558|CFD1_YEAST	C2-C1	-0.572794	0.397226	-1.44198	8	0.187285	0.999512	NA	0	0
sp|P40560|YIA1_YEAST	C2-C1	0.435526	1.14209	0.381341	7	0.714261	0.999512	NA	0	0
sp|P40561|SGN1_YEAST	C2-C1	-0.152871	0.138445	-1.1042	8	0.301606	0.999512	NA	0	0
sp|P40562|MPH1_YEAST	C2-C1	-0.36137	0.522136	-0.692099	8	0.508461	0.999512	NA	0	0
sp|P40563|AIM21_YEAST	C2-C1	-0.122962	0.109684	-1.12106	8	0.294785	0.999512	NA	0	0
sp|P40564|DJP1_YEAST	C2-C1	0.0996854	0.317327	0.314141	8	0.76145	0.999512	NA	0	0
sp|P40566|YIS7_YEAST	C2-C1	0.015875	0.119958	0.132338	8	0.897985	0.999512	NA	0	0
sp|P40567|MSL1_YEAST	C2-C1	0.626193	1.94905	0.321282	8	0.75623	0.999512	NA	0	0
sp|P40573|MET28_YEAST	C2-C1	-0.341798	0.323945	-1.05511	8	0.322195	0.999512	NA	0	0
sp|P40576|YIU4_YEAST	C2-C1	-0.158411	0.0668472	-2.36975	8	0.045264	0.999512	NA	0	0
sp|P40578|MGA2_YEAST	C2-C1	-0.4031	0.444923	-0.905999	8	0.391406	0.999512	NA	0.0833333	0.0833333
sp|P40579|YIV5_YEAST	C2-C1	-0.283677	0.195576	-1.45047	8	0.184977	0.999512	NA	0	0
sp|P40580|BZRD_YEAST	C2-C1	-0.0784088	0.071927	-1.09012	8	0.307405	0.999512	NA	0	0
sp|P40581|GPX3_YEAST	C2-C1	-0.164884	0.135961	-1.21273	8	0.259828	0.999512	NA	0	0
sp|P40582|GST1_YEAST	C2-C1	-0.246567	0.119028	-2.0715	8	0.0720608	0.999512	NA	0	0
sp|P40693|RLP7_YEAST	C2-C1	-0.0492176	0.107432	-0.458128	8	0.659048	0.999512	NA	0	0
sp|P40825|SYA_YEAST	C2-C1	0.0143715	0.0416642	0.344937	8	0.739035	0.999512	NA	0	0
sp|P40850|MKT1_YEAST	C2-C1	-0.00745778	0.0682254	-0.109311	8	0.915648	0.999512	NA	0	0
sp|P40851|AXL1_YEAST	C2-C1	-0.445274	0.578489	-0.769718	8	0.463586	0.999512	NA	0	0
sp|P40856|SA185_YEAST	C2-C1	0.0652788	0.139522	0.467874	8	0.652356	0.999512	NA	0	0
sp|P40858|RN49_YEAST	C2-C1	0.041583	0.0985337	0.422018	8	0.684124	0.999512	NA	0	0
sp|P40893|REE1_YEAST	C2-C1	0.111036	0.146132	0.759832	8	0.469152	0.999512	NA	0	0
sp|P40897|OPT1_YEAST	C2-C1	-0.0387624	0.462719	-0.083771	8	0.935297	0.999512	NA	0	0
sp|P40955|CHS6_YEAST	C2-C1	-0.513276	0.792297	-0.647833	8	0.535239	0.999512	NA	0	0
sp|P40956|GTS1_YEAST	C2-C1	0.0701241	0.0513192	1.36643	8	0.208972	0.999512	NA	0	0
sp|P40957|MAD1_YEAST	C2-C1	-0.0384989	0.138436	-0.278099	8	0.787989	0.999512	NA	0.0128205	0.0128205
sp|P40959|MVP1_YEAST	C2-C1	-0.158548	0.120206	-1.31897	8	0.22368	0.999512	NA	0	0
sp|P40960|PAC11_YEAST	C2-C1	-0.0442916	0.145728	-0.303933	8	0.768934	0.999512	NA	0	0
sp|P40961|PHB1_YEAST	C2-C1	0.0370238	0.0619153	0.597975	8	0.566396	0.999512	NA	0	0
sp|P40962|RTS2_YEAST	C2-C1	-0.162783	0.333243	-0.488481	8	0.638317	0.999512	NA	0	0
sp|P40968|PRP17_YEAST	C2-C1	-0.15738	0.250547	-0.628144	8	0.547418	0.999512	NA	0	0
sp|P40969|CBF3B_YEAST	C2-C1	0.853316	1.56758	0.544353	8	0.601038	0.999512	NA	0	0
sp|P40970|LCB2_YEAST	C2-C1	-0.0832932	0.0789144	-1.05549	8	0.322032	0.999512	NA	0	0
sp|P40986|CDC1_YEAST	C2-C1	-0.0433189	0.0778955	-0.556115	8	0.593341	0.999512	NA	0	0
sp|P40988|FET4_YEAST	C2-C1	-0.0599839	0.26216	-0.228807	8	0.82476	0.999512	NA	0	0
sp|P40989|FKS2_YEAST	C2-C1	0.152955	0.205603	0.743932	8	0.478196	0.999512	NA	0	0
sp|P40990|MSS2_YEAST	C2-C1	-0.148566	0.492393	-0.301722	8	0.770559	0.999512	NA	0	0
sp|P40991|NOP2_YEAST	C2-C1	-0.00478482	0.0620354	-0.0771305	8	0.940414	0.999512	NA	0	0
sp|P40994|ARF3_YEAST	C2-C1	-0.0374811	0.122657	-0.305576	8	0.767728	0.999512	NA	0	0
sp|P41056|RL33B_YEAST	C2-C1	-0.0669127	0.117013	-0.57184	8	0.583136	0.999512	NA	0	0
sp|P41057|RS29A_YEAST	C2-C1	-0.378574	0.230574	-1.64188	8	0.139242	0.999512	NA	0	0
sp|P41058|RS29B_YEAST	C2-C1	-0.230697	0.261798	-0.881203	8	0.403904	0.999512	NA	0	0
sp|P41277|GPP1_YEAST	C2-C1	-0.0382927	0.089584	-0.42745	8	0.680324	0.999512	NA	0	0
sp|P41318|LST8_YEAST	C2-C1	0.0120472	0.348666	0.0345523	8	0.973283	0.999512	NA	0	0
sp|P41338|THIL_YEAST	C2-C1	0.0169602	0.0997352	0.170052	8	0.869191	0.999512	NA	0	0
sp|P41543|OST1_YEAST	C2-C1	0.0141229	0.132213	0.106819	8	0.917562	0.999512	NA	0	0
sp|P41697|BUD6_YEAST	C2-C1	-0.0106936	0.0489672	-0.218382	8	0.832599	0.999512	NA	0.0208333	0.0208333
sp|P41698|BUD8_YEAST	C2-C1	0.288959	1.26869	0.227761	8	0.825545	0.999512	NA	0	0
sp|P41734|IAH1_YEAST	C2-C1	-0.133116	0.13774	-0.966425	8	0.362134	0.999512	NA	0	0
[truncated: 20,597 more rows]
